# Supplementary material for: Identification and validation of common molecular targets of hydroxytyrosol
Source: Royal Society of Chemistry journal article supplement (doi:10.1039/c9fo01159e), 2019-01-01

## Identification and validation of common molecular targets of hydroxytyrosol.

María-Carmen LÓPEZ DE LAS HAZAS<sup>1</sup>✉, Roberto MARTIN-HERNÁNDEZ<sup>2</sup>✉, María Carmen CRESPO<sup>3</sup>✉, Joao TOMÉ-CARNEIRO<sup>3</sup>, Lorena DEL POZO-ACEBO<sup>1</sup>, María B. RUIZ-ROSO<sup>1</sup>, Joan C. ESCOLA-GIL<sup>4,5,6</sup>, Jesús OSADA<sup>7,8,9</sup>, María P. PORTILLO<sup>8, 10</sup>, José Alfredo MARTINEZ<sup>8, 11,12,13</sup>, María A. NAVARRO<sup>7,8,9</sup>, Laura RUBIÓ<sup>14</sup>, María José MOTILVA<sup>14,15</sup>, Francesco VISIOLI<sup>3,16</sup>, Alberto DÁVALOS<sup>1\*</sup>

<sup>1</sup>Laboratory of Epigenetics of Lipid Metabolism, Instituto Madrileño de Estudios Avanzados (IMDEA)-Alimentación, CEI UAM+CSIC, 28049 Madrid, Spain.

<sup>2</sup>Bioinformatics and Biostatistics Unit, IMDEA Food Institute, CEI UAM+CSIC, Madrid 28049, Spain

<sup>3</sup>Laboratory of Functional Foods, Instituto Madrileño de Estudios Avanzados (IMDEA)-Alimentación, CEI UAM+CSIC, 28049 Madrid, Spain.

<sup>4</sup>Institut d'Investigacions Biomèdiques (IIB) Sant Pau, Barcelona, Spain.

<sup>5</sup>CIBER de Diabetes y Enfermedades Metabólicas Asociadas (CIBERDEM), Barcelona, Spain.

<sup>6</sup>Departament de Bioquímica, Biologia Molecular i Biomedicina, Universitat Autònoma de Barcelona, Spain.

<sup>7</sup>Instituto Agroalimentario de Aragón, CITA-Universidad de Zaragoza, E-50013, Spain.

<sup>8</sup>CIBER de Fisiopatología de la Obesidad y Nutrición, Instituto de Salud Carlos III, Madrid, E-28029, Spain

<sup>9</sup>Departamento de Bioquímica y Biología Molecular y Celular, Facultad de Veterinaria, Instituto de Investigación Sanitaria de Aragón-Universidad de Zaragoza, Zaragoza, E-50013, Spain.

<sup>10</sup>Obesity and Nutrition Group. Dpt. Nutrition and food Science. Faculty of Pharmacy. University of the Basque Country and Lucio Lascaray Research Center

<sup>11</sup>Department of Nutrition, Food Science and Physiology and Centre for Nutrition Research, University of Navarra, 31008 Pamplona, Spain.

<sup>12</sup>Navarra Institute for Health Research (IdiSNA), 31008 Pamplona, Spain.

<sup>13</sup>Precision Nutrition and Cardiometabolic Health Department, Madrid Institute of Advanced Studies (IMDEA Food), 28049 Madrid, Spain.

<sup>14</sup>Food Technology Department, XaRTA-TPV, Escuela Técnica Superior de Ingeniería Agraria, University of Lleida, Av/Alcalde Rovira Roure 191, 25198 Lleida, Spain.

<sup>15</sup>Instituto de Ciencias de la Vid y del Vino (ICVV) (CSIC Universidad de la Rioja-Gobierno de La Rioja), Logroño, Spain

<sup>16</sup>Department of Molecular Medicine, University of Padova, Viale G. Colombo 3, 35121 Padova, Italy.

¥These authors contributed equally to this work

**Correspondence to:** Dr. Alberto Dávalos, Laboratory of Epigenetics of Lipid Metabolism. IMDEA Food Institute. Carretera de Canto Blanco, 8. 28049 Madrid (Spain)  
E-mail: [alberto.davalos@imdea.org](mailto:alberto.davalos@imdea.org) Tel. +34912796985

### **Online Supplementary Materials**

**Supplementary Table S1.** Brain microarray analysis.

**Supplementary Table S2.** Liver microarray analysis (.xls file).

**Supplementary Table S3.** Common genes to at least three samples from transcriptomic analysis.

**Supplementary Table S4.** Liver small RNA-seq analysis.

**Supplementary Figure S1.** Venn diagram of commonly modulated miRNAs in liver and intestine mice samples.

**Supplementary Table S1.** Brain microarray analysis.

| TargetID      | Statistic    | p.value     | Adj.p.value | FC         |
|---------------|--------------|-------------|-------------|------------|
| IGSF1         | 6.471964006  | 0.00000013  | 0.001180823 | -0.468431  |
| PMCH          | 5.454279886  | 0.00000322  | 0.019430653 | -1.149446  |
| BCL11A        | -4.9483681   | 0.0000157   | 0.047408682 | 0.3975312  |
| CART          | 5.053050611  | 0.0000113   | 0.047408682 | -0.6808666 |
| ITM2A         | 4.960939163  | 0.0000151   | 0.047408682 | -0.5870824 |
| SGPP2         | 4.731141444  | 0.0000308   | 0.0797418   | -0.6729612 |
| UNC13C        | 4.646174606  | 0.0000401   | 0.090691643 | -0.5761778 |
| GABBR1        | 4.414469925  | 0.0000815   | 0.147559153 | -0.447643  |
| MBNL1         | 4.426161517  | 0.0000787   | 0.147559153 | -0.5393822 |
| CENTG1        | -4.290276722 | 0.000119    | 0.179265576 | 0.3999754  |
| SLC6A3        | 4.309842883  | 0.000112    | 0.179265576 | -0.8625256 |
| RIT2          | 4.17896787   | 0.000166    | 0.231428272 | -0.4113994 |
| PSD2          | 4.034608871  | 0.000256    | 0.330779109 | -0.4694362 |
| ZFP521        | 3.909282884  | 0.000371    | 0.447240396 | -0.4686466 |
| D430041B17RIK | -3.820743065 | 0.000481    | 0.507806457 | 0.4712444  |
| EN2           | 3.803678814  | 0.000505    | 0.507806457 | -1.05219   |
| NPAS4         | -3.814198411 | 0.00049     | 0.507806457 | 0.5234156  |
| CC2D1B        | -3.751876575 | 0.000587    | 0.54143725  | 0.4873052  |
| DPP10         | 3.712469599  | 0.000658    | 0.54143725  | -0.3032878 |
| SLC6A4        | 3.721793974  | 0.000641    | 0.54143725  | -0.4738458 |
| SPRY3         | 3.714822536  | 0.000654    | 0.54143725  | -0.530368  |
| C1QL2         | -3.671618932 | 0.00074     | 0.544550466 | 0.4955068  |
| PRR7          | -3.670143082 | 0.000744    | 0.544550466 | 0.4329098  |
| SCG2          | 3.666158186  | 0.000752    | 0.544550466 | -0.4337376 |
| STMN1         | -3.628626292 | 0.000838    | 0.583201443 | 0.4153284  |
| LOC100045304  | 3.580444412  | 0.000962    | 0.644555723 | -0.4968106 |
| SYNGR3        | 3.54790857   | 0.001054931 | 0.681861958 | -0.3123828 |
| AMN           | -3.525300015 | 0.001124852 | 0.692121011 | 0.4600406  |
| MATN4         | -3.518331046 | 0.001147289 | 0.692121011 | 0.3905038  |
| BAI2          | -3.500610272 | 0.001206294 | 0.704241975 | 0.3631512  |
| 4932409I22RIK | -3.471935216 | 0.001307991 | 0.717334127 | 0.3331096  |
| TRIM9         | -3.479446956 | 0.001280582 | 0.717334127 | 0.2865792  |
| ALKBH3        | -3.448242972 | 0.001398174 | 0.738652707 | 0.3977362  |
| B230206H07RIK | -3.440606273 | 0.001428492 | 0.738652707 | 0.2400516  |
| ZIC1          | 3.409945246  | 0.001556678 | 0.782576438 | -0.5859722 |
| CORT          | -3.386754756 | 0.00166087  | 0.812389784 | 0.3776366  |
| AW551984      | 3.34314846   | 0.001875112 | 0.893046899 | -0.2319814 |
| DBPHT2        | -3.316907719 | 0.002016496 | 0.902876455 | 0.3821266  |
| RAP1GAP       | 3.311757117  | 0.002045416 | 0.902876455 | -0.3618892 |
| RND2          | 3.316289867  | 0.002019944 | 0.902876455 | -0.465527  |
| CAMKV         | -3.287429206 | 0.002187443 | 0.920659167 | 0.4111936  |
| ELP2          | -3.293719104 | 0.002149847 | 0.920659167 | 0.286325   |
| KCNA2         | 3.266904302  | 0.002314529 | 0.952008037 | -0.509     |

|               |              |             |             |            |
|---------------|--------------|-------------|-------------|------------|
| ACTL6B        | -3.257356941 | 0.002376012 | 0.955579286 | 0.2607052  |
| DCTN1         | 3.225273126  | 0.002594209 | 0.998936223 | -0.4902258 |
| ISLR2         | -3.22950054  | 0.002564407 | 0.998936223 | 0.5912396  |
| 0610006I08RIK | 0.867652621  | 0.391049771 | 0.999967467 | -0.0782234 |
| 0610007C21RIK | -0.218448787 | 0.828252472 | 0.999967467 | 0.0251     |
| 0610007P08RIK | 0.481257562  | 0.633102777 | 0.999967467 | -0.048138  |
| 0610007P14RIK | 0.666112485  | 0.509377026 | 0.999967467 | -0.1503534 |
| 0610007P22RIK | -1.565669127 | 0.125745482 | 0.999967467 | 0.2979338  |
| 0610008C08RIK | -0.098536498 | 0.922026044 | 0.999967467 | 0.0228482  |
| 0610009B22RIK | -0.116657561 | 0.907747925 | 0.999967467 | 0.0233458  |
| 0610009D07RIK | -0.372442239 | 0.711639991 | 0.999967467 | 0.0436138  |
| 0610009O20RIK | -1.790833698 | 0.081316429 | 0.999967467 | 0.2061094  |
| 0610010D20RIK | 0.160182689  | 0.873588581 | 0.999967467 | -0.0195998 |
| 0610010E21RIK | -0.7580811   | 0.453094647 | 0.999967467 | 0.2053462  |
| 0610010K06RIK | 0.528617736  | 0.600155417 | 0.999967467 | -0.0993636 |
| 0610010K14RIK | 0.148017539  | 0.883114283 | 0.999967467 | -0.0143532 |
| 0610011L14RIK | -0.50777299  | 0.614557516 | 0.999967467 | 0.1015254  |
| 0610012A05RIK | 0.006740375  | 0.994657384 | 0.999967467 | -0.0007734 |
| 0610012D14RIK | -0.581969832 | 0.564035883 | 0.999967467 | 0.0986204  |
| 0610012G03RIK | -0.768717859 | 0.446828789 | 0.999967467 | 0.109689   |
| 0610012H03RIK | 0.133033781  | 0.8948711   | 0.999967467 | -0.0269432 |
| 0610013E23RIK | -0.032158578 | 0.974514493 | 0.999967467 | 0.0061446  |
| 0610025P10RIK | -0.816287692 | 0.41944105  | 0.999967467 | 0.1235872  |
| 0610031J06RIK | 0.288039353  | 0.774887268 | 0.999967467 | -0.0333254 |
| 0610037D15RIK | -0.09662239  | 0.923535837 | 0.999967467 | 0.0232154  |
| 0610037L13RIK | -0.203393989 | 0.839916122 | 0.999967467 | 0.0425256  |
| 0610037P05RIK | -0.003070565 | 0.997566166 | 0.999967467 | 0.0004462  |
| 0610038F07RIK | 0.178572414  | 0.8592254   | 0.999967467 | -0.03631   |
| 0610040J01RIK | 0.230532936  | 0.818918599 | 0.999967467 | -0.0470454 |
| 0710008K08RIK | -0.386439974 | 0.701333773 | 0.999967467 | 0.0444732  |
| 0910001A06RIK | 1.382737083  | 0.174845758 | 0.999967467 | -0.1970844 |
| 0910001L09RIK | -0.477019888 | 0.636089447 | 0.999967467 | 0.0558944  |
| 1100001E04RIK | 0.616492668  | 0.541258102 | 0.999967467 | -0.042705  |
| 1100001G20RIK | -0.0307101   | 0.975662026 | 0.999967467 | 0.0074136  |
| 1100001H23RIK | -0.072120652 | 0.942885467 | 0.999967467 | 0.0092792  |
| 1100001I19RIK | -0.081404006 | 0.935549398 | 0.999967467 | 0.01146    |
| 1110001A07RIK | 0.375137044  | 0.70965153  | 0.999967467 | -0.0391424 |
| 1110001J03RIK | -1.584211289 | 0.121462448 | 0.999967467 | 0.1998534  |
| 1110002B05RIK | -0.092359758 | 0.926899102 | 0.999967467 | 0.0262596  |
| 1110002H13RIK | 0.117431198  | 0.907139009 | 0.999967467 | -0.0081484 |
| 1110002N22RIK | 0.248123192  | 0.805379695 | 0.999967467 | -0.06304   |
| 1110003E01RIK | 0.275429316  | 0.784483801 | 0.999967467 | -0.0249848 |
| 1110004E09RIK | -0.121262487 | 0.90412431  | 0.999967467 | 0.0192828  |
| 1110004F10RIK | -0.329970538 | 0.74324072  | 0.999967467 | 0.0410788  |
| 1110005A03RIK | 0.137794524  | 0.891132908 | 0.999967467 | -0.0198294 |
| 1110005A23RIK | -0.235465826 | 0.815115979 | 0.999967467 | 0.0199132  |

|               |              |             |             |            |
|---------------|--------------|-------------|-------------|------------|
| 1110006G06RIK | -0.204695004 | 0.838906681 | 0.999967467 | 0.0591614  |
| 1110007A13RIK | 1.000804933  | 0.323273621 | 0.999967467 | -0.1011118 |
| 1110007C09RIK | -0.140660812 | 0.888883472 | 0.999967467 | 0.0151018  |
| 1110007F05RIK | 0.054063643  | 0.957168679 | 0.999967467 | -0.0058992 |
| 1110007H17RIK | -0.413887825 | 0.681291127 | 0.999967467 | 0.0300066  |
| 1110007L15RIK | -1.434202684 | 0.159721251 | 0.999967467 | 0.1433164  |
| 1110007M04RIK | 0.427893625  | 0.671152315 | 0.999967467 | -0.0534722 |
| 1110008F13RIK | 0.970758217  | 0.337828697 | 0.999967467 | -0.249892  |
| 1110008J03RIK | -0.021922969 | 0.982624516 | 0.999967467 | 0.0022486  |
| 1110008P14RIK | -0.960217076 | 0.343037216 | 0.999967467 | 0.1755232  |
| 1110012D08RIK | 0.456415382  | 0.650698407 | 0.999967467 | -0.0702794 |

**Supplementary Table S3.** Common genes to at least three samples from transcriptomic analysis.

**Common genes to four studies**

**Common genes to brain (supplementary data S-1), adipose tissue (Giordano, 2014), small intestine (Tomé-Carneiro et al., 2016) and breast tissue (Granados-Principal et al., 2011)**

Abi3bp Csgalnact1 Epas1 Gde1 Med18 Olfm12b Pfn2 Por Sdc2 Slc40a1 Top1 Tra2a Trit1 Zmat1  
Coq9 Cyp11b1 Fbxo27 Hnrnpa2b1 Ncstn Pcmt1

**Common genes to liver (supplementary data S-2), adipose tissue (Giordano, 2014), small intestine (Tomé-Carneiro et al., 2016) and breast tissue (Granados-Principal et al., 2011)**

Aldh6a1 Clqtmf2 C6 Creld2 Crem Cxcl1 Igfbp7 Lum Msi2 Scara5 Slc19a1

**Common genes to liver (supplementary data S-2), brain (supplementary data S-1), small intestine (Tomé-Carneiro et al., 2016) and breast tissue (Granados-Principal et al., 2011)**

Adam22 Cirbp Foxj2 Kcnb1 Kcnt1 Lpin2 Ncald Rgs8 Sema6a Snx16 Tia1

**Common genes to liver (supplementary data S-2), brain (supplementary data S-1), adipose tissue (Giordano, 2014) and breast tissue (Granados-Principal et al., 2011)**

Aes Bnip2 Daxx Gm2a Irak1 Marcks Nfasc Pwp2 Secisbp2 Tcf7l2 Thap3 Tpp2 Vdac2 Wdr24  
Ankrd10 Ccdc32 Dnajb9 Gmpr2 Klhl12 Mast2 Pabpn1 Qrt1 Sfxn5 Terf2 Tjp2 Tpr Vps33a Xylt2  
Ankzf1 Chka Dus11 Grb10 Klhl22 Med7 Ppp1cb Rpl39 Stx6 Tfdp1 Tnip2 Usp10 Vps41 Ythdf1  
Atp5o Clk1 Foxred1 Imp4 Lrrfip1 Metap1 Ptges3 Rpp25 Tbc1d2b

**Common genes to liver (supplementary data S-2), brain (supplementary data S-1), adipose tissue (Giordano, 2014) and small intestine (Tomé-Carneiro et al., 2016)**

Accs Anks6 Ccl25 Fbf1 Hexim2 Hsp90b1 Plscr2 Polk Reg3a Reg3b Reg3g Rngtt Xrcc2 Zfp91  
Acy1 Atp6v0a1 Cxxc4 Gpr153

**Common genes to three studies**

**Common genes to Brain (supplementary data S-1), liver (Supplementary data S-2) and adipose tissue (Giordano, 2014).**

|        |           |         |         |        |         |          |         |         |        |          |         |         |         |
|--------|-----------|---------|---------|--------|---------|----------|---------|---------|--------|----------|---------|---------|---------|
| Aaas   | Ap2m1     | Cct8    | Ctnnb1  | Emp2   | Gemin7  | Kbtbd2   | Mppe1   | Nipa1   | Psmc4  | Rfwd3    | Slc7a7  | Tal1    | Vps36   |
| Abcb6  | Arhgef19  | Cdk2ap2 | Cul1    | Ercc5  | Gfod1   | Kctd3    | Mrpl18  | Nup107  | Rab23  | Rgs10    | Smpd4   | Tesk1   | Vps39   |
| Abcd4  | Arpc5l    | Cept1   | Cul5    | Exosc8 | Gm21992 | Lgmn     | Mrpl4   | Oplah   | Rab34  | Ric3     | Smug1   | Tfb2m   | Vt1a    |
| Abhd5  | Atg2a     | Cggbp1  | Dcp1b   | Fadd   | Gosr1   | Lig1     | Mrpl40  | Ostm1   | Rab8b  | Riok1    | Smyd2   | Thumpd3 | Wipf1   |
| Abtb1  | Atp5e     | Cldn15  | Dgka    | Fbxl14 | Gtdc1   | Ln timer | Mrpl48  | Ovol2   | Rae1   | Rnf121   | Snx6    | Timm17a | Xpc     |
| Acad9  | Bmpr1a    | Clec4e  | Dlst    | Fbxo25 | Hcfc1   | Lrig1    | Mrpl52  | Pdcd2l  | Rassf8 | Rnf41    | Spag17  | Tmem110 | Yipf4   |
| Adcy9  | C1galt1c1 | Clic4   | Dnajc16 | Fbxo9  | Hcst    | Lsm12    | Mrpl53  | Pdxdc1  | Rbbp7  | Rpa3     | Spg7    | Tmem115 | Ywhae   |
| Adora1 | Cab39l    | Cmtm6   | Dock4   | Fem1b  | Icmt    | Lyrn2    | Mtmr12  | Pgls    | Rbbp9  | Rpe      | Spry4   | Tmem33  | Zbtb46  |
| Agk    | Caenb3    | Cnksr3  | Ears2   | Fnbp1  | Id4     | Meer     | Myo7a   | Pik3cd  | Rbl1   | Rps3a1   | Srfbp1  | Traf3   | Zcchc14 |
| Ak3    | Ccdc115   | Coq2    | Ednra   | Fndc3b | Ier3ip1 | Med30    | Ncoa6   | Plekhf1 | Rbm15  | Rrn3     | Srp14   | Tram1   | Zfand2b |
| Alcam  | Ccdc117   | Cox6b1  | Efnb2   | Frs2   | Inpp5f  | Mkks     | Ndr g3  | Pnkp    | Rbm4   | Scyl1    | Ssbp2   | Trim32  | Zfp57   |
| Alg14  | Ccdc124   | Crbn    | Egln1   | Fzr1   | Iqsec3  | Mkln1    | Ndufb10 | Pnpla2  | Reg3d  | Sh3bgrl  | St3gal6 | Trove2  | Zfp64   |
| Als2   | Ccdc43    | Cryl1   | Eif3k   | Galnt1 | Itp2    | Mlycd    | Ndufc2  | Polr2g  | Ret    | Slc15a4  | Stat1   | Ubap1   | Znhit2  |
| Amigo1 | Ccdc90b   | Cstf1   | Elov1   | Gcdh   | Josd1   | Mpdu1    | Nfat5   | Psmc4   | Rev3l  | Slc25a26 | Steap2  | Unc13b  | Zyx     |
| Anapc7 | Ccdc94    |         |         |        |         |          |         |         |        |          |         |         |         |

**Common genes to Liver (Supplementary data S-2), Brain (supplementary data S-1), and small intestine (Tomé-Carneiro et al., 2016)**

|          |            |         |         |        |          |        |         |         |         |          |       |         |       |
|----------|------------|---------|---------|--------|----------|--------|---------|---------|---------|----------|-------|---------|-------|
| Ankrd13b | Caenb3     | Creg2   | Dync1i1 | Gm4559 | Igfbp1   | Mark1  | Neurod2 | Pes1    | Rhbdf1  | Slc25a16 | Socs5 | Spp1    | Uchl3 |
| Armc9    | Cadm3      | Ctdspl2 | Epha4   | Ifna12 | Kcnu1    | Mas1   | Npas4   | Phactr1 | Shisa2  | Slc25a33 | Sod1  | Sult4a1 | Unc5c |
| Btdb1    | Cadps      | Depdc5  | Epha5   | Ifna7  | Krt31    | Megf10 | Nup160  | Rasl10b | Slc16a7 | Slc33a1  | Spon1 | Ube4a   | Wscd1 |
| C5ar1    | Chrn timer | Dock3   | Fgfr3   | Ift80  | Krtap5-5 | Mtus1  | Pax3    | Rbmy    |         |          |       |         |       |

**Common genes to liver (Supplementary data S-2), brain (supplementary data S-1), and breast tissue (Granados-Principal et al., 2011)**

|          |        |          |        |        |        |         |        |       |         |         |          |         |        |
|----------|--------|----------|--------|--------|--------|---------|--------|-------|---------|---------|----------|---------|--------|
| Acbd3    | Atp5s  | Ccdc84   | Cnga4  | Dnajb6 | Grik4  | Inpp5e  | Lpp    | Myo1d | Pigp    | Rab24   | Scap     | Tmem39a | Uso1   |
| Adnp     | Bcap31 | Cdkn2aip | Cnot6  | Drp2   | Hapln1 | Iqce    | Lrba   | Neto1 | Ppp1r9b | Rab3d   | Sez6l2   | Tnnc1   | Wdr54  |
| Ammecr11 | Bckdha | Chst2    | Cnot7  | Fgf7   | Hbegf  | Jsrp1   | Mbd5   | Nfic  | Prkrip1 | Rabggta | Slc25a28 | Trhde   | Ythdf2 |
| Asb5     | Btbd11 | Chuk     | Crebl2 | Galnt2 | Hdac5  | Keap1   | Med13  | Nosip | Prr3    | Rpap1   | Stk4     | Txlna   | Zufsp  |
| Atp2a2   | Capn3  | Ciapin1  | Dgcr8  | Gcc2   | Ilkap  | L3mbtl2 | Myo18a | Pde6b | Qrich1  | Rrp1b   | Tacc3    | Urod    |        |

**Common genes to liver (Supplementary data S-2), adipose tissue (Giordano, 2014), and small intestine (Tomé-Carneiro et al., 2016)**

|         |       |        |       |        |       |        |       |        |        |       |          |         |       |
|---------|-------|--------|-------|--------|-------|--------|-------|--------|--------|-------|----------|---------|-------|
| Adrb2   | Apaf1 | Bmpr1b | Cd53  | Cyb5r1 | Dock9 | Gp1bb  | Ltb   | Megf6  | P2ry10 | Pmm1  | Rabgap11 | Thap4   | Vcl   |
| Aldh1a1 | Asb11 | Cat    | Csad  | Cyba   | Esd   | Gtpbp3 | Mapk4 | Mknk2  | Pdia6  | Pqbp1 | Sell     | Tmem45a | Wipi1 |
| Aldh1a7 | Bcl7a | Cblb   | Cxcl9 | Dapk1  | Faim2 | Lhx3   | Mccc1 | Notch1 | Pibf1  | Ptpn2 | Soat1    | Toe1    |       |

**Common genes to liver (Supplementary data S-2), adipose tissue (Giordano, 2014), and breast tissue (Granados-Principal et al., 2011)**

|        |         |         |          |         |        |        |         |          |          |          |         |        |        |
|--------|---------|---------|----------|---------|--------|--------|---------|----------|----------|----------|---------|--------|--------|
| Abcc5  | Aox1    | Cstf2   | Donson   | Fkbp9   | Klf5   | Ncor1  | Ogfod1  | Per3     | Rpl3l    | Slc38a10 | Srp72   | Tnrc6a | Ywhab  |
| Acadv1 | Aqp2    | Cxcl3   | Ebi3     | Gpam    | Kti12  | Nicn1  | Osbpl2  | Pigt     | Rsl1d1   | Slc9a3r2 | Stt3a   | Top3a  | Zc3h15 |
| Acsl4  | Asb6    | Ddx46   | Eprs     | Hgs     | Lipe   | Nif3l1 | Pcolce  | Ppp1r12c | Sec24c   | Sltm     | Tbc1d9b | Tpst1  | Zc3h7a |
| Agtrap | B4galt1 | Ddx50   | F11r     | Ifrd2   | Mrps24 | Nucb2  | Pdcd11  | Ptdss2   | Sgta     | Snrpd1   | Tcp11   | Trim25 |        |
| Akap10 | Ccdc71  | Dhx36   | Fgfr1op2 | Igf2bp2 | Mrps6  | Nup62  | Pdcd6ip | Pus1     | Slc25a44 | Snta1    | Tgfb1   | Ube2q1 |        |
| Ampd2  | Cspp1   | Dnase2b | Fkbp10   | Ildr1   | Naga   | Nupl2  | Pdgfra  | Rpap3    | Slc35a2  | Sorcs2   | Thbd    | Ubiad1 |        |

**Common genes to liver (Supplementary data S-2), small intestine (Tomé-Carneiro et al., 2016), and breast tissue (Granados-Principal et al., 2011)**

|        |        |        |        |        |         |        |         |        |        |        |        |        |       |
|--------|--------|--------|--------|--------|---------|--------|---------|--------|--------|--------|--------|--------|-------|
| Ablim1 | Brd1   | Cdkn1b | Csf1   | Fgf21  | Il22ra2 | Mcm3ap | Nrap    | Paxip1 | Ptger4 | Ryr1   | Tmem91 | Trex2  | Usp13 |
| Ankrd2 | Cacybp | Cep97  | Eaf2   | Grin2a | Lifr    | Mex3a  | Obscn   | Plagl2 | Rbpms  | Stk38l | Tnnt3  | Trim54 | Usp8  |
| Aspn   | Cdkl2  | Cr2    | Eef1a2 | Hrc    | Mamdc4  | Myl1   | Osbpl1a | Ppmlj  | Rgs6   | Synpo2 |        |        |       |



**Common genes to brain (supplementary data S-1), adipose tissue (Giordano, 2014), and small intestine (Tomé-Carneiro et al., 2016)**

|         |        |               |         |        |         |         |       |         |          |        |        |         |           |
|---------|--------|---------------|---------|--------|---------|---------|-------|---------|----------|--------|--------|---------|-----------|
| Acox2   | Asphd1 | Dab2ip        | Foxp1   | Hsd3b2 | Ikzf2   | Mapkap1 | Npy   | Pla2g7  | Ptgds    | Rprm   | Sfi1   | Smarca1 | Tmem5     |
| Adamts4 | Bbs2   | E330021D16Rik | Fzd7    | Hsd3b3 | Jakmip1 | Mcoln1  | Nsdhl | Plekho2 | Ptprd    | Rusc2  | Sh3gl2 | Tex9    | Tnfrsf11b |
| Akap7   | Bcat1  | Efna5         | Gramd1a | Hsd3b4 | Kcnab2  | Mgst2   | Nudt5 | Ppp2r1b | Retsat   | Ryr3   | Shisa4 | Tmco3   | Wfdc2     |
| Ankmy2  | Bmp1   | Epdr1         | Grip1   | Hsd3b6 | Kif1b   | Mras    | Olfm1 | Ppt1    | Rnaset2a | Samhd1 | Smad5  | Tmem175 | Zdhhc17   |
| Aqr     | Crot   | Fbxo33        | Gtf3c2  | Hspa8  | Laptm5  | Ncapd3  | Pex6  |         |          |        |        |         |           |
| Armcx3  | Crym   | Flcn          | Hbp1    | Ikbkg  | Mapk6   | Ndufb11 |       |         |          |        |        |         |           |

**Common genes to brain (supplementary data S-1), adipose tissue (Giordano, 2014), and breast tissue (Granados-Principal et al., 2011)**

|          |         |         |        |        |          |        |         |         |         |         |         |          |        |
|----------|---------|---------|--------|--------|----------|--------|---------|---------|---------|---------|---------|----------|--------|
| Acadm    | Atp13a1 | Ccnd3   | Ddx41  | Fahd2a | Gpatch4  | Kcnab1 | Mrps31  | Paox    | Plekhj1 | Rabggtb | Senp3   | Tceal5   | Ub15   |
| Acp2     | Atp6ap2 | Cdk9    | Ddx5   | Fancb  | Gpd1     | Kcnip3 | Mtap    | Parp6   | Plxna2  | Ralbp1  | Slc35b1 | Tcirg1   | Ub17   |
| Adam15   | Atp6v1a | Chmp2a  | Ddx6   | Fcgrt  | Hexa     | Lig4   | Mxd4    | Pbrm1   | Pms2    | Rap2b   | Slc6a17 | Tgfbr2   | Ulk1   |
| Adss     | Bbs9    | Ciz1    | Dgat2  | Ftsj3  | Hook2    | Lrrc8a | Mybbp1a | Pdcd4   | Pofut2  | Rit1    | Slit3   | Tjap1    | Unc5a  |
| Ahnak2   | Bcas3   | Clec11a | Dguok  | Fundc1 | Hspa2    | Lysmd2 | Nip7    | Per2    | Ppm1b   | Rnf123  | Smad2   | Tle1     | Usp19  |
| Akap8    | Bmp4    | Clk4    | Dlk2   | Fxyd1  | Htatsf1  | Man2b1 | Nit1    | Pgk1    | Ppm1k   | Rnf168  | Snape4  | Tmem106c | Usp47  |
| Alg12    | Bms1    | Ctdspl  | Dnaja2 | G6pc3  | Igsf9    | Manba  | Nol3    | Phf2011 | Ppp2r1a | Rps13   | Sort1   | Tmub1    | Uvrag  |
| Arfgap1  | Bscl2   | Cxcl12  | Dvl1   | Gas7   | Igtp     | Manbal | Nol9    | Pick1   | Prf1    | Rrp1    | Spag9   | Tsc22d1  | Vps18  |
| Arhgap12 | Camk2d  | Dag1    | Eif4g1 | Gba    | Ilf2     | March2 | Nr2c1   | Pik3c3  | Prmt5   | Rsrc2   | Sparc   | Tsen2    | Wbp4   |
| Arl2bp   | Capns1  | Dapk2   | Elac2  | Gkap1  | Ilf3     | Mat2a  | Numb    | Pitpnm2 | Ptptra  | S100a1  | Spink8  | Tsr1     | Wdr46  |
| Arl6ip5  | Capzb   | Dapk3   | Emd    | Gna12  | Irf2     | Mcl1   | Ogt     | Pkmyt1  | Pxdn    | Sart3   | Stmn2   | Uba2     | Yeats4 |
| Arsb     | Casc3   | Dazap1  | Entpd5 | Gnb5   | Irx2     | Mgat1  | Oxr1    | Plekhb2 | Qpct    | Scand1  | Supv311 | Ubac2    | Zfand3 |
| Atg7     | Ccnc    | Dcun1d5 | Ext2   | Gns    | Itgb1bp1 | Mmp17  | Panx1   | Plekhg3 | R3hdm2  | Scp2    | Tbc1d19 | Ube2q2   | Zfhx3  |

**Common genes to brain (supplementary data S-1), small intestine (Tomé-Carneiro et al., 2016), and breast tissue (Granados-Principal et al., 2011)**

|        |          |         |        |        |       |       |         |        |         |       |       |       |       |
|--------|----------|---------|--------|--------|-------|-------|---------|--------|---------|-------|-------|-------|-------|
| Aptx   | C1qtnf7  | Cntnap2 | Dusp11 | Gpr176 | Klf11 | Plcg1 | Sec14l2 | Sox15  | Thoc1   | Trim9 | Tulp3 | Wasf3 | Zfp37 |
| Arl10  | Cacna2d1 | Ctrl    | Echdc1 | Hook3  | Lhx9  | Rbbp6 | Slc46a3 | Spink4 | Timm9   |       |       |       |       |
| Atp8a1 | Chordc1  | Dclk2   | Gda    | Igsf1  | Pdpk1 | Rora  | Sorl1   | Sycp3  | Tmem201 |       |       |       |       |

**Common genes to adipose tissue (Giordano, 2014), small intestine (Tomé-Carneiro et al., 2016), and breast tissue (Granados-Principal et al., 2011).**

|         |        |        |      |       |        |       |        |       |      |        |         |       |         |
|---------|--------|--------|------|-------|--------|-------|--------|-------|------|--------|---------|-------|---------|
| Ankrd27 | Camk2b | Crygn  | Egr1 | Gstm7 | Kctd14 | Nfe2  | Nudt15 | Palmd | Plp1 | Rhoj   | Sh3kbp1 | Star  | Tfpi    |
| Apbb2   | Chchd7 | Ddx20  | Fryl | Hp    | Lama2  | Ntsr1 | Orm1   | Pir   | Ppid | Sec22b | Sord    | Susd4 | Zmynd10 |
| Cage1   | Crat   | Dusp22 |      |       |        |       |        |       |      |        |         |       |         |

**Supplementary Table S4.** Liver small RNA-seq analysis.

| <b>miRNA</b>     | <b>logFC</b> | <b>logCPM</b> | <b>PValue</b> | <b>FDR</b>  |
|------------------|--------------|---------------|---------------|-------------|
| mmu-miR-802-5p   | 0,819591129  | 6,568041596   | 0.000178255   | 0.026280412 |
| mmu-miR-423-3p   | 0,508351217  | 7,055717952   | 0.000212797   | 0.026280412 |
| mmu-miR-30a-5p   | 0,523813039  | 15,6957709    | 0.000455528   | 0.030010623 |
| mmu-miR-146b-5p  | 0,495017075  | 6,465567649   | 0.000486002   | 0.030010623 |
| mmu-miR-128-3p   | 0,4939714    | 5,77610583    | 0.002592046   | 0.128047081 |
| mmu-miR-30e-5p   | 0,365266513  | 11,74887639   | 0.003473262   | 0.142982623 |
| mmu-miR-542-3p   | 0,403821689  | 7,837345495   | 0.0050216     | 0.177190731 |
| mmu-miR-30d-5p   | 0,336333907  | 13,15870412   | 0.007496593   | 0.231457304 |
| mmu-miR-101a-3p  | 0,285015553  | 14,00999923   | 0.008936202   | 0.245249111 |
| mmu-miR-802-3p   | 0,613690553  | 3,713288128   | 0.013806214   | 0.341013474 |
| mmu-miR-34a-5p   | 0,516233952  | 4,766646949   | 0.016318008   | 0.366413449 |
| mmu-miR-98-5p    | 0,313900957  | 8,177808463   | 0.021462156   | 0.441762707 |
| mmu-miR-1249-3p  | -1,149595952 | 1,578827362   | 0.024571519   | 0.466858862 |
| mmu-miR-22-5p    | 0,302844763  | 7,39071858    | 0.026743968   | 0.471840008 |
| mmu-miR-744-5p   | 0,313531265  | 6,285873418   | 0.03294848    | 0.482044237 |
| mmu-miR-322-5p   | 0,475290277  | 4,121024104   | 0.035501889   | 0.482044237 |
| mmu-miR-148a-3p  | 0,378139578  | 18,18543548   | 0.036566689   | 0.482044237 |
| mmu-let-7e-5p    | 0,304224544  | 8,66691578    | 0.037033004   | 0.482044237 |
| mmu-miR-149-5p   | 0,471697121  | 5,366387129   | 0.037080326   | 0.482044237 |
| mmu-miR-674-3p   | 0,322661946  | 5,803839106   | 0.041481398   | 0.507057063 |
| mmu-miR-339-5p   | 0,346547438  | 6,001383825   | 0.043110115   | 0.507057063 |
| mmu-miR-140-3p   | 0,239008426  | 7,88065486    | 0.045461174   | 0.510404994 |
| mmu-miR-1198-5p  | 0,325236162  | 5,266472392   | 0.05541572    | 0.585201765 |
| mmu-miR-30e-3p   | 0,214427803  | 8,976180719   | 0.05686171    | 0.585201765 |
| mmu-miR-31-5p    | 0,277853081  | 6,509121103   | 0.061408505   | 0.606716029 |
| mmu-miR-32-3p    | 0,666114542  | 2,552158567   | 0.081527199   | 0.725619886 |
| mmu-miR-30d-3p   | 0,285897484  | 5,026361572   | 0.090518246   | 0.725619886 |
| mmu-miR-122-3p   | 0,260266776  | 8,351519312   | 0.091612177   | 0.725619886 |
| mmu-miR-532-3p   | 0,555527184  | 2,726625928   | 0.095142108   | 0.725619886 |
| mmu-miR-1968-5p  | 0,608365129  | 2,614258166   | 0.095957098   | 0.725619886 |
| mmu-miR-22-3p    | 0,201092963  | 12,16521508   | 0.096024375   | 0.725619886 |
| mmu-miR-139-5p   | 0,230739537  | 6,612830123   | 0.096456597   | 0.725619886 |
| mmu-let-7e-3p    | 0,528756886  | 3,368390469   | 0.096945167   | 0.725619886 |
| mmu-miR-106b-3p  | 0,28152474   | 5,40804422    | 0.102950528   | 0.745634169 |
| mmu-miR-381-3p   | 0,404440716  | 3,69771159    | 0.114902444   | 0.745634169 |
| mmu-miR-421-3p   | 0,509541847  | 2,49940670    | 0.121707527   | 0.745634169 |
| mmu-miR-30c-5p   | 0,177063846  | 12,41751854   | 0.123876588   | 0.745634169 |
| mmu-let-7d-5p    | 0,170140119  | 10,40770669   | 0.124162541   | 0.745634169 |
| mmu-miR-146a-5p  | 0,204325833  | 11,60162545   | 0.125456221   | 0.745634169 |
| mmu-miR-1843b-5p | 0,231790058  | 6,545786921   | 0.127985893   | 0.745634169 |
| mmu-miR-1839-3p  | 0,424595406  | 3,308001525   | 0.13029771    | 0.745634169 |
| mmu-miR-872-3p   | 0,451399871  | 2,778270936   | 0.131902131   | 0.745634169 |
| mmu-miR-320-3p   | 0,24724428   | 5,30978612    | 0.132630125   | 0.745634169 |

|                  |             |             |             |             |
|------------------|-------------|-------------|-------------|-------------|
| mmu-let-7d-3p    | 0,221915502 | 6,853304467 | 0.135102495 | 0.745634169 |
| mmu-miR-152-5p   | 0,255931039 | 5,340707208 | 0.13603791  | 0.745634169 |
| mmu-miR-335-5p   | 0,231610285 | 7,201396138 | 0.139163734 | 0.745634169 |
| mmu-miR-300-3p   | 0,535363732 | 2,45865421  | 0.142744858 | 0.745634169 |
| mmu-miR-143-3p   | 0,193222324 | 13,73531693 | 0.145533307 | 0.745634169 |
| mmu-miR-465c-5p  | 0,611631086 | 2,199685477 | 0.147919329 | 0.745634169 |
| mmu-miR-107-3p   | 0,178417357 | 8,783059376 | 0.158646108 | 0.783711774 |
| mmu-miR-200b-3p  | 0,205819662 | 8,785087063 | 0.174070235 | 0.825701242 |
| mmu-miR-871-3p   | 0,586437614 | 2,483563456 | 0.176111986 | 0.825701242 |
| mmu-miR-378a-5p  | 0,223874829 | 5,431664362 | 0.17717476  | 0.825701242 |
| mmu-miR-16-1-3p  | 0,252285597 | 4,561050365 | 0.186904112 | 0.840837511 |
| mmu-miR-881-3p   | 0,294073698 | 5,390738044 | 0.187231025 | 0.840837511 |
| mmu-miR-16-5p    | 0,148500092 | 10,02434498 | 0.19770061  | 0.865602759 |
| mmu-miR-676-5p   | 0,329832142 | 3,997137709 | 0.199754483 | 0.865602759 |
| mmu-miR-425-5p   | 0,190129623 | 5,313959686 | 0.212316496 | 0.89283577  |
| mmu-let-7f-5p    | 0,159838128 | 15,47653417 | 0.213268463 | 0.89283577  |
| mmu-miR-339-3p   | 0,384623546 | 3,423125115 | 0.225910008 | 0.924978906 |
| mmu-let-7a-5p    | 0,121728093 | 13,52507017 | 0.230272964 | 0.924978906 |
| mmu-miR-200a-5p  | 0,284214918 | 3,712333719 | 0.232916733 | 0.924978906 |
| mmu-miR-10a-5p   | 0,120308486 | 13,2114202  | 0.238972417 | 0.924978906 |
| mmu-miR-145a-3p  | 0,155435311 | 7,936030728 | 0.239670648 | 0.924978906 |
| mmu-miR-24-2-5p  | 0,166506822 | 7,13183817  | 0.251580556 | 0.933417445 |
| mmu-miR-338-3p   | 0,47332424  | 2,445379619 | 0.265528923 | 0.933417445 |
| mmu-miR-127-3p   | 0,19244216  | 5,031808142 | 0.266392711 | 0.933417445 |
| mmu-miR-379-5p   | 0,225397299 | 4,552768351 | 0.268053767 | 0.933417445 |
| mmu-miR-126a-3p  | 0,110216901 | 14,49636688 | 0.268407382 | 0.933417445 |
| mmu-miR-744-3p   | 0,610757756 | 1,886047444 | 0.268574922 | 0.933417445 |
| mmu-miR-183-5p   | 0,234904109 | 6,894335182 | 0.269836793 | 0.933417445 |
| mmu-miR-1964-3p  | 0,420071343 | 3,034826041 | 0.272090075 | 0.933417445 |
| mmu-miR-221-5p   | 0,184467985 | 6,405537236 | 0.278736995 | 0.933417445 |
| mmu-miR-212-5p   | 0,388754437 | 2,257428323 | 0.284659425 | 0.933417445 |
| mmu-miR-322-3p   | 0,137225364 | 6,818117959 | 0.288120925 | 0.933417445 |
| mmu-miR-215-5p   | 0,410378507 | 4,966166793 | 0.291865569 | 0.933417445 |
| mmu-miR-1981-5p  | 0,245580036 | 4,438105326 | 0.296335046 | 0.933417445 |
| mmu-miR-27a-5p   | 0,250336097 | 4,193635196 | 0.301890271 | 0.933417445 |
| mmu-miR-532-5p   | 0,123528631 | 8,573948186 | 0.303110417 | 0.933417445 |
| mmu-miR-34c-5p   | 0,319018302 | 3,846147843 | 0.309572866 | 0.933417445 |
| mmu-miR-342-3p   | 0,221178231 | 4,714127878 | 0.309757816 | 0.933417445 |
| mmu-miR-199b-5p  | 0,242008911 | 4,771512443 | 0.315772879 | 0.933417445 |
| mmu-miR-30a-3p   | 0,108390341 | 10,54080274 | 0.316680302 | 0.933417445 |
| mmu-miR-186-5p   | 0,134334345 | 8,187891273 | 0.318966085 | 0.933417445 |
| mmu-miR-26a-2-3p | 0,312052678 | 3,744488245 | 0.32121653  | 0.933417445 |
| mmu-miR-26a-5p   | 0,107414469 | 14,7637575  | 0.329687391 | 0.939699362 |
| mmu-miR-20a-5p   | 0,118150773 | 9,160927557 | 0.332247132 | 0.939699362 |
| mmu-miR-378a-3p  | 0,156623745 | 12,29073785 | 0.337975803 | 0.939699362 |
| mmu-miR-99a-5p   | 0,116212887 | 12,3082925  | 0.33907386  | 0.939699362 |

|                   |             |              |             |             |
|-------------------|-------------|--------------|-------------|-------------|
| mmu-miR-340-5p    | 0,125333346 | 12,32506488  | 0.345242988 | 0.939699362 |
| mmu-miR-192-3p    | 0,233722354 | 3,309514104  | 0.346205028 | 0.939699362 |
| mmu-miR-1948-3p   | 0,411987137 | 2,184858145  | 0.35064373  | 0.941402189 |
| mmu-miR-223-3p    | 0,292246199 | 3,6549346    | 0.361259603 | 0.944173874 |
| mmu-miR-192-5p    | 0,115761983 | 16,32677283  | 0.361508243 | 0.944173874 |
| mmu-miR-221-3p    | 0,100307021 | 9,225718495  | 0.380147708 | 0.944173874 |
| mmu-miR-182-5p    | 0,226657474 | 8,698376798  | 0.388586356 | 0.944173874 |
| mmu-miR-19b-3p    | 0,108028107 | 9,412724935  | 0.393599227 | 0.944173874 |
| mmu-miR-200c-3p   | 0,157946657 | 4,944499778  | 0.394196822 | 0.944173874 |
| mmu-miR-338-5p    | 0,251230561 | 3,369092779  | 0.398935277 | 0.944173874 |
| mmu-miR-199a-5p   | 0,112398137 | 9,329470031  | 0.406615422 | 0.944173874 |
| mmu-let-7g-5p     | 0,083811894 | 15,31826753  | 0.410080689 | 0.944173874 |
| mmu-miR-511-3p    | 0,227091064 | 4,501335786  | 0.413328362 | 0.944173874 |
| mmu-miR-23a-3p    | 0,14204034  | 8,389548688  | 0.416435662 | 0.944173874 |
| mmu-miR-30c-2-3p  | 0,120463102 | 8,469408139  | 0.417923735 | 0.944173874 |
| mmu-miR-125b-2-3p | 0,136597638 | 5,896964331  | 0.421826476 | 0.944173874 |
| mmu-miR-7a-5p     | 0,138393673 | 11,29877832  | 0.422926291 | 0.944173874 |
| mmu-miR-148b-5p   | 0,182608821 | 4,687630546  | 0.42362984  | 0.944173874 |
| mmu-miR-503-5p    | 0,306298812 | 2,34597679   | 0.430846281 | 0.944173874 |
| mmu-miR-374b-5p   | 0,11180139  | 8,240750175  | 0.431052026 | 0.944173874 |
| mmu-miR-351-5p    | 0,121550006 | 5,916502883  | 0.434696617 | 0.944173874 |
| mmu-miR-152-3p    | 0,093423926 | 11,00888116  | 0.442166782 | 0.944173874 |
| mmu-miR-92a-3p    | 0,159408702 | 4,277974809  | 0.443036191 | 0.944173874 |
| mmu-miR-17-5p     | 0,106447508 | 7,14477387   | 0.444699564 | 0.944173874 |
| mmu-miR-25-3p     | 0,097098198 | 9,977753473  | 0.445270726 | 0.944173874 |
| mmu-miR-148a-5p   | 0,10902271  | 8,442371198  | 0.455425695 | 0.944173874 |
| mmu-miR-210-3p    | 0,253882771 | 3,125521327  | 0.459449428 | 0.944173874 |
| mmu-miR-195a-3p   | 0,168784712 | 4,044045966  | 0.46050289  | 0.944173874 |
| mmu-miR-148b-3p   | 0,086770722 | 10,181625690 | 0.462096387 | 0.944173874 |
| mmu-miR-365-3p    | 0,116609966 | 6,299938637  | 0.462446813 | 0.944173874 |
| mmu-miR-193a-3p   | 0,286799072 | 3,139224711  | 0.470426266 | 0.944173874 |
| mmu-miR-30c-1-3p  | 0,204822784 | 4,358809622  | 0.472136195 | 0.944173874 |
| mmu-miR-1839-5p   | 0,103436405 | 8,896396104  | 0.477747061 | 0.944173874 |
| mmu-miR-99b-3p    | 0,183542268 | 3,733070792  | 0.485772078 | 0.944173874 |
| mmu-miR-7a-1-3p   | 0,156253555 | 3,714479873  | 0.490501883 | 0.944173874 |
| mmu-miR-33-5p     | 0,288509249 | 2,328951839  | 0.490713535 | 0.944173874 |
| mmu-miR-151-5p    | 0,120475804 | 5,696042327  | 0.491995654 | 0.944173874 |
| mmu-miR-27b-5p    | 0,350172724 | 2,115406918  | 0.495671052 | 0.944173874 |
| mmu-miR-132-3p    | 0,240321874 | 2,978700283  | 0.495984007 | 0.944173874 |
| mmu-miR-125b-1-3p | 0,286140392 | 2,581713107  | 0.497053917 | 0.944173874 |
| mmu-miR-150-5p    | 0,211838909 | 4,156236241  | 0.501530204 | 0.944173874 |
| mmu-miR-181d-5p   | 0,128949192 | 5,163798003  | 0.505311912 | 0.944173874 |
| mmu-miR-129-5p    | 0,210705162 | 2,648032302  | 0.507547064 | 0.944173874 |
| mmu-miR-125a-3p   | 0,27993814  | 2,608545066  | 0.508401317 | 0.944173874 |
| mmu-miR-144-5p    | 0,436890895 | 3,823165425  | 0.516117496 | 0.948973584 |
| mmu-miR-140-5p    | 0,105543259 | 6,895727667  | 0.518669772 | 0.948973584 |

|                   |             |             |             |             |
|-------------------|-------------|-------------|-------------|-------------|
| mmu-miR-30b-3p    | 0,110013168 | 5,469976638 | 0.523932175 | 0.951553288 |
| mmu-miR-194-5p    | 0,061446124 | 13,94130771 | 0.533743336 | 0.958542088 |
| mmu-let-7b-5p     | 0,066070834 | 11,37038082 | 0.552137721 | 0.958542088 |
| mmu-miR-191-3p    | 0,20157471  | 2,395064988 | 0.554485971 | 0.958542088 |
| mmu-miR-130a-3p   | 0,122798779 | 5,624907102 | 0.554988281 | 0.958542088 |
| mmu-miR-185-5p    | 0,074075056 | 9,56114978  | 0.556562368 | 0.958542088 |
| mmu-miR-1843a-3p  | 0,148761999 | 4,639384783 | 0.557860846 | 0.958542088 |
| mmu-miR-18a-5p    | 0,242086657 | 1,987531623 | 0.558626089 | 0.958542088 |
| mmu-miR-1a-3p     | 0,126830649 | 6,861925696 | 0.558826156 | 0.958542088 |
| mmu-miR-181b-5p   | 0,138274413 | 5,506081222 | 0.564554975 | 0.961690199 |
| mmu-miR-218-5p    | 0,176462277 | 2,970432277 | 0.571082861 | 0.966147032 |
| mmu-miR-19a-3p    | 0,089766459 | 7,111183183 | 0.583343036 | 0.968654123 |
| mmu-miR-21a-3p    | 0,130238549 | 3,791961803 | 0.587422822 | 0.968654123 |
| mmu-miR-9-5p      | 0,324702804 | 2,421754558 | 0.588220113 | 0.968654123 |
| mmu-miR-361-5p    | 0,104910276 | 5,077102099 | 0.589878683 | 0.968654123 |
| mmu-miR-676-3p    | 0,187327938 | 4,008318254 | 0.596796988 | 0.968654123 |
| mmu-miR-700-3p    | 0,291418443 | 2,170537117 | 0.600613724 | 0.968654123 |
| mmu-miR-23b-3p    | 0,065186069 | 8,459443971 | 0.607885213 | 0.968654123 |
| mmu-miR-450b-5p   | 0,115211851 | 2,818817813 | 0.610531592 | 0.968654123 |
| mmu-let-7f-2-3p   | 0,278829078 | 2,313555887 | 0.610955187 | 0.968654123 |
| mmu-miR-181a-2-3p | 0,160417994 | 2,545381669 | 0.611890664 | 0.968654123 |
| mmu-miR-434-5p    | 0,232115288 | 2,993190403 | 0.616881712 | 0.968654123 |
| mmu-miR-10a-3p    | 0,100449942 | 6,144171692 | 0.619624905 | 0.968654123 |
| mmu-miR-574-5p    | 0,225833498 | 3,396449206 | 0.626913713 | 0.969281661 |
| mmu-miR-361-3p    | 0,059431901 | 7,720562657 | 0.62787476  | 0.969281661 |
| mmu-miR-125b-5p   | 0,054212857 | 9,644694398 | 0.636794473 | 0.974778367 |
| mmu-miR-26b-5p    | 0,050515856 | 10,81587527 | 0.65089146  | 0.974778367 |
| mmu-miR-28a-5p    | 0,077184969 | 6,063426082 | 0.651670024 | 0.974778367 |
| mmu-miR-143-5p    | 0,133098847 | 4,076023319 | 0.653538827 | 0.974778367 |
| mmu-miR-29b-2-5p  | 0,212725465 | 2,09670493  | 0.653698166 | 0.974778367 |
| mmu-miR-222-3p    | 0,101847256 | 4,589519794 | 0.656756278 | 0.974778367 |
| mmu-miR-350-3p    | 0,178423132 | 3,471759548 | 0.659060677 | 0.974778367 |
| mmu-miR-96-5p     | 0,129975811 | 4,933258665 | 0.677935696 | 0.980240166 |
| mmu-miR-467a-5p   | 0,085229179 | 3,149478801 | 0.685460646 | 0.980240166 |
| mmu-miR-365-2-5p  | 0,219012735 | 2,322441353 | 0.685848796 | 0.980240166 |
| mmu-miR-423-5p    | 0,060389234 | 7,334412393 | 0.6874697   | 0.980240166 |
| mmu-miR-674-5p    | 0,149815537 | 2,343735069 | 0.689990657 | 0.980240166 |
| mmu-miR-99b-5p    | 0,0556976   | 9,407971119 | 0.691975014 | 0.980240166 |
| mmu-miR-29a-3p    | 0,043852475 | 11,63098692 | 0.69688089  | 0.980240166 |
| mmu-miR-741-3p    | 0,149640323 | 3,259256595 | 0.697228337 | 0.980240166 |
| mmu-miR-652-3p    | 0,136563541 | 3,549490974 | 0.702234443 | 0.980240166 |
| mmu-miR-106b-5p   | 0,096205387 | 5,368001468 | 0.70243931  | 0.980240166 |
| mmu-let-7b-3p     | 0,060573182 | 4,07751381  | 0.707556266 | 0.981833694 |
| mmu-miR-450a-5p   | 0,05703414  | 6,397055202 | 0.721739541 | 0.988898513 |
| mmu-miR-194-2-3p  | 0,063830278 | 6,646482661 | 0.724117426 | 0.988898513 |
| mmu-miR-362-3p    | 0,087502422 | 5,326608489 | 0.724658424 | 0.988898513 |

|                 |             |             |             |             |
|-----------------|-------------|-------------|-------------|-------------|
| mmu-miR-145a-5p | 0,046579658 | 9,498033268 | 0.740420536 | 0.990370996 |
| mmu-miR-24-1-5p | 0,114308702 | 3,296657284 | 0.749009451 | 0.990370996 |
| mmu-miR-501-3p  | 0,072033182 | 4,197063511 | 0.751950519 | 0.990370996 |
| mmu-miR-29b-3p  | 0,059814733 | 6,838380548 | 0.75532722  | 0.990370996 |
| mmu-miR-465b-5p | 0,206472816 | 2,276681725 | 0.759608928 | 0.990370996 |
| mmu-miR-671-3p  | 0,057165522 | 4,055431666 | 0.766278235 | 0.990370996 |
| mmu-miR-27a-3p  | 0,043836702 | 10,76299057 | 0.767287236 | 0.990370996 |
| mmu-miR-330-5p  | 0,13477401  | 2,723352236 | 0.770096508 | 0.990370996 |
| mmu-miR-503-3p  | 0,043626249 | 2,533957583 | 0.774348967 | 0.990370996 |
| mmu-miR-155-5p  | 0,062701618 | 4,358671208 | 0.779140542 | 0.990370996 |
| mmu-miR-28a-3p  | 0,036625725 | 6,465110855 | 0.784126664 | 0.990370996 |
| mmu-miR-592-5p  | 0,076326334 | 4,627063014 | 0.786698178 | 0.990370996 |
| mmu-miR-32-5p   | 0,03113582  | 6,703518014 | 0.790555936 | 0.990370996 |
| mmu-miR-24-3p   | 0,030873155 | 9,959829452 | 0.799950488 | 0.990370996 |
| mmu-let-7c-5p   | 0,026906373 | 13,76266698 | 0.800512965 | 0.990370996 |
| mmu-miR-195a-5p | 0,045008373 | 5,894788134 | 0.806534835 | 0.990370996 |
| mmu-miR-214-3p  | 0,06027546  | 3,896129933 | 0.811738185 | 0.990370996 |
| mmu-miR-21a-5p  | 0,026773002 | 16,14060002 | 0.812516769 | 0.990370996 |
| mmu-miR-122-5p  | 0,022479556 | 17,36608025 | 0.81518605  | 0.990370996 |
| mmu-miR-598-3p  | 0,056671564 | 4,156752594 | 0.815327862 | 0.990370996 |
| mmu-miR-31-3p   | 0,109759498 | 2,109942746 | 0.817832197 | 0.990370996 |
| mmu-miR-7b-5p   | 0,027343716 | 11,18891607 | 0.82109484  | 0.990370996 |
| mmu-miR-328-3p  | 0,043438614 | 6,818939482 | 0.822829662 | 0.990370996 |
| mmu-miR-200a-3p | 0,036452909 | 8,617084017 | 0.830756203 | 0.990370996 |
| mmu-miR-3105-3p | 0,119950856 | 2,851094237 | 0.832599389 | 0.990370996 |
| mmu-miR-191-5p  | 0,025215578 | 10,93217785 | 0.837752426 | 0.990370996 |
| mmu-miR-137-3p  | 0,080912143 | 2,920092878 | 0.843764605 | 0.990370996 |
| mmu-miR-15a-5p  | 0,067728618 | 4,50451075  | 0.853553125 | 0.990370996 |
| mmu-miR-214-5p  | 0,008553328 | 3,319977654 | 0.854915008 | 0.990370996 |
| mmu-miR-15b-5p  | 0,026062556 | 5,350424465 | 0.855447312 | 0.990370996 |
| mmu-miR-101b-3p | 0,0267991   | 9,673688513 | 0.860509559 | 0.990370996 |
| mmu-miR-193a-5p | 0,054367137 | 3,597068322 | 0.863442002 | 0.990370996 |
| mmu-miR-181c-5p | 0,063884135 | 2,520729019 | 0.864354194 | 0.990370996 |
| mmu-miR-93-5p   | 0,022619931 | 8,176925704 | 0.873406503 | 0.990370996 |
| mmu-miR-144-3p  | 0,189573015 | 2,849445964 | 0.873465193 | 0.990370996 |
| mmu-miR-541-5p  | 0,053138283 | 3,602884505 | 0.876899525 | 0.990370996 |
| mmu-miR-335-3p  | 0,033553309 | 6,081206154 | 0.878123114 | 0.990370996 |
| mmu-miR-26b-3p  | 0,080202799 | 3,071530632 | 0.88195801  | 0.990370996 |
| mmu-miR-126a-5p | 0,017657264 | 10,44570217 | 0.891982953 | 0.990370996 |
| mmu-miR-411-5p  | 0,037666373 | 3,445071860 | 0.900543537 | 0.990370996 |
| mmu-miR-326-3p  | 0,156193165 | 1,958215205 | 0.905408062 | 0.990370996 |
| mmu-miR-151-3p  | 0,0234361   | 7,609104617 | 0.905780862 | 0.990370996 |
| mmu-miR-362-5p  | 0,066134258 | 4,121801183 | 0.914821977 | 0.990370996 |
| mmu-miR-30b-5p  | 0,009667524 | 9,787675875 | 0.915679928 | 0.990370996 |
| mmu-miR-27b-3p  | 0,01118715  | 13,72540745 | 0.916759125 | 0.990370996 |
| mmu-miR-345-3p  | 0,036467959 | 3,80465909  | 0.918738534 | 0.990370996 |

|                   |             |             |             |             |
|-------------------|-------------|-------------|-------------|-------------|
| mmu-miR-132-5p    | 0,119442811 | 2,285584863 | 0.921022484 | 0.990370996 |
| mmu-miR-434-3p    | 0,086278456 | 2,249785857 | 0.921929187 | 0.990370996 |
| mmu-miR-103-3p    | 0,012993114 | 10,84041205 | 0.929109844 | 0.990370996 |
| mmu-miR-1843a-5p  | 0,012040747 | 8,437115201 | 0.931195673 | 0.990370996 |
| mmu-miR-872-5p    | 0,021079191 | 6,982288013 | 0.931831163 | 0.990370996 |
| mmu-miR-181a-1-3p | 0,034034609 | 2,930596633 | 0.937429618 | 0.990370996 |
| mmu-let-7c-1-3p   | 0,005765304 | 2,718228971 | 0.938246207 | 0.990370996 |
| mmu-miR-429-3p    | 0,029430942 | 5,183516717 | 0.948037912 | 0.99313849  |
| mmu-miR-340-3p    | 0,013199745 | 5,535087874 | 0.94890965  | 0.99313849  |
| mmu-miR-100-5p    | 0,005605346 | 10,61139685 | 0.963245431 | 0.996270326 |
| mmu-let-7f-1-3p   | 0,001737312 | 4,237961492 | 0.967803716 | 0.996270326 |
| mmu-miR-1948-5p   | 0,011324941 | 4,380596076 | 0.968551111 | 0.996270326 |
| mmu-miR-574-3p    | 0,009365739 | 4,469891711 | 0.969422385 | 0.996270326 |
| mmu-let-7i-5p     | 0,003210632 | 12,57786846 | 0.974326298 | 0.996270326 |
| mmu-miR-181a-5p   | 0,003451968 | 7,846539455 | 0.97610291  | 0.996270326 |
| mmu-miR-125a-5p   | 0,002713148 | 8,960988712 | 0.992859346 | 1           |
| mmu-miR-187-3p    | 0,006781397 | 4,86971879  | 1           | 1           |
| mmu-miR-223-5p    | 0,07505897  | 2,822185531 | 1           | 1           |
| mmu-miR-181c-3p   | 0,03693757  | 2,851552374 | 1           | 1           |
| mmu-miR-15b-3p    | 0,017365015 | 3,21432569  | 1           | 1           |

**Supplementary Figure S1.** Venn diagram of commonly modulated miRNAs in liver and intestine mice samples. Male young C57BL/6 mice (n=7 per group) fed with a control or HT diet (45 mg HT/kg bw/day), for 8 weeks.

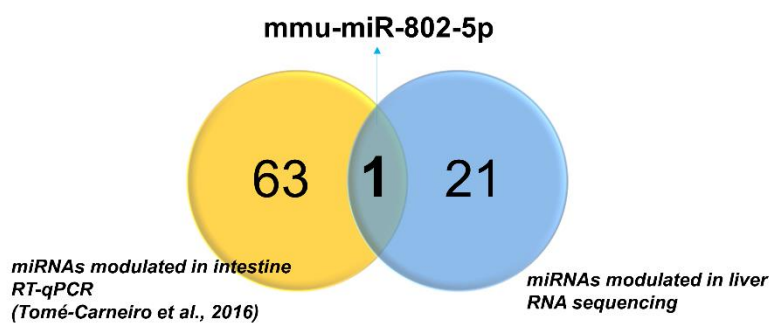

Supplement: c9fo01159e1.pdf [file c9fo01159e1.pdf]
