# Supplementary material for: Identification and validation of common molecular targets of hydroxytyrosol
Source: Royal Society of Chemistry journal article supplement (doi:10.1039/c9fo01159e), 2019-01-01
Supplement: c9fo01159e2.xlsx [file c9fo01159e2.xlsx]

## Sheet: results_liver
Table S2- Transcriptome of Liver tissue from mice samples
TargetID	Statistic	p.value	Adj.P.value	FC
MCPT8	-10.290801	1.59E-12	1.44E-08	0.99700655
TDO2	10.11766729	2.56E-12	1.55E-08	-0.69982265
GPR155	9.70831056	8.01E-12	3.62E-08	-0.77015555
RUVBL2	9.310742835	2.47E-11	8.95E-08	-1.26386695
DSPP	-9.028273085	5.58E-11	0.000000168	1.2389485
ZFP422	-8.796688433	1.09E-10	0.000000283	0.62122935
FLT3	-8.648195086	1.69E-10	0.000000383	0.7354429
2310033K02RIK	8.531562237	2.39E-10	0.00000048	-1.24407055
DCPP3	-8.437689917	3.15E-10	0.00000057	0.66674495
TAAR2	-8.098371787	8.68E-10	0.00000143	0.53248955
PRPMP5	-7.925752023	1.46E-09	0.0000022	0.64064355
TPD52L2	7.817095407	2.03E-09	0.00000263	-1.2796748
SLFN9	-7.837481525	1.91E-09	0.00000263	0.75452585
DDX46	7.585837811	4.11E-09	0.00000465	-1.2321115
ERICH1	7.588552839	4.08E-09	0.00000465	-0.9912547
2210407C18RIK	-7.503228787	5.29E-09	0.00000564	0.74863655
WISP1	7.397049088	7.34E-09	0.00000738	-0.6102226
PTCH2	-7.359263017	8.24E-09	0.00000785	1.15306645
SERPINA3F	7.293287708	1.01E-08	0.00000914	-1.62448045
KRT16	-7.061985369	2.07E-08	0.0000178	0.67744975
1110028A07RIK	7.015521557	2.39E-08	0.0000188	-1.17997585
SLC30A9	7.029839152	2.28E-08	0.0000188	-0.82634185
UBIAD1	6.934317051	3.07E-08	0.0000222	-0.987548
ZFP748	6.937758795	3.04E-08	0.0000222	-0.65894195
PARD6B	-6.908458246	3.33E-08	0.0000232	1.22562445
KTI12	6.826462517	4.30E-08	0.0000288	-0.8748065
CNKSR3	6.801960019	4.64E-08	0.00003	-1.08367465
DHRS13	6.77151887	5.11E-08	0.0000308	-0.79600235
OTTMUSG00000015529	-6.760822911	5.28E-08	0.0000308	1.0091658
RBMY1A1	-6.764686938	5.22E-08	0.0000308	1.05770245
UBE2R2	6.689902988	6.59E-08	0.0000373	-0.91984425
ARMC9	6.668187672	7.05E-08	0.0000387	-0.7169058
ANAPC11	-6.633613506	7.86E-08	0.0000418	0.448966
LOC732482	6.595872016	8.85E-08	0.0000457	-1.01721015
BMX	-6.574225875	9.47E-08	0.0000473	0.53517395
EGR3	-6.567781281	9.66E-08	0.0000473	0.7848608
NKD1	-6.553979302	1.01E-07	0.000048	1.0521368
GBP1	6.526187211	1.10E-07	0.0000511	-1.19870845
OLFR73	-6.508561311	1.16E-07	0.0000512	0.4060071
AK122525	-6.49415313	1.22E-07	0.0000512	0.48411365
DLG2	-6.500150732	1.19E-07	0.0000512	0.70118445
LECT2	-6.506229955	1.17E-07	0.0000512	1.02836475
FGF21	6.44605025	1.42E-07	0.0000557	-1.84741685
ZFP451	6.4473614	1.41E-07	0.0000557	-1.074597
CADM3	-6.456815494	1.37E-07	0.0000557	0.83043995
ATP13A5	-6.436884405	1.46E-07	0.0000561	0.53279205
CNGB3	-6.417009469	1.55E-07	0.0000585	1.10138555
CRELD2	6.409400167	1.59E-07	0.0000587	-1.48056545
DFFA	6.378187392	1.75E-07	0.0000634	-0.7875758
ADPRHL2	6.292813911	2.29E-07	0.0000783	-1.02828675
TUG1	6.300506363	2.24E-07	0.0000783	-0.61549335
ASAH3	-6.296884951	2.26E-07	0.0000783	1.02461725
DDX49	6.256550841	2.57E-07	0.0000861	-1.2450879
MEF2B	-6.242040011	2.69E-07	0.0000885	0.6075608
OLFR357	6.19461288	3.12E-07	0.000101	-0.907511
EG272350	6.183710993	3.23E-07	0.000103	-0.6265909
MED30	6.160353667	3.48E-07	0.000107	-1.1473879
OLFR166	-6.16345999	3.44E-07	0.000107	0.47695045
DPF1	-6.149672163	3.60E-07	0.000108	0.42815825
ENSMUSG00000033219	-6.127255282	3.86E-07	0.000115	0.3762481
THUMPD3	6.114138456	4.02E-07	0.000116	-0.9998948
FNBP4	-6.113915059	4.03E-07	0.000116	0.727845
CCR6	-6.043812729	5.02E-07	0.000142	0.70634835
ALOX12B	-6.037153582	5.13E-07	0.000143	1.2580501
NUP155	-6.027623847	5.28E-07	0.000145	0.5897989
SARM1	-5.978452226	6.17E-07	0.000167	0.73028445
HAND1	-5.969942646	6.34E-07	0.000169	0.8842797
LOC100044363	-5.870607653	8.67E-07	0.000227	0.49443135
PI4KA	5.845235172	9.39E-07	0.000243	-0.8850793
9330176C04RIK	5.837175729	9.64E-07	0.000246	-0.93616445
SPATA9	-5.812248057	1.04E-06	0.000262	1.03778655
9530066K23RIK	-5.799046109	1.09E-06	0.000269	1.16659585
VPS26A	-5.78778948	1.13E-06	0.000275	0.6486805
PEPD	5.764324287	1.21E-06	0.000282	-1.08678755
NUP62	5.759879585	1.23E-06	0.000282	-0.814243
ALCAM	5.763297484	1.22E-06	0.000282	-0.78080065
DSC2	-5.774721868	1.17E-06	0.000282	0.4305083
LOC100046274	-5.759099309	1.23E-06	0.000282	0.94320245
OTTMUSG00000016703	-5.754047084	1.25E-06	0.000283	0.35458125
OLFR1259	-5.734011871	1.33E-06	0.000298	0.38445665
SENP1	5.720661647	1.39E-06	0.000307	-0.75012395
DAK	5.705557369	1.46E-06	0.000314	-0.92090205
HNRNPR	-5.709539443	1.44E-06	0.000314	0.35298635
OLFR648	-5.696922456	1.50E-06	0.000319	1.1197908
LOC100046163	5.690450019	1.53E-06	0.000322	-0.71558155
NUDT2	5.682833834	1.57E-06	0.000326	-1.03927135
AQP2	5.676971928	1.60E-06	0.000328	-0.62990715
TNFRSF4	-5.663223466	1.67E-06	0.000339	1.12757245
B3GALT2	-5.651526005	1.73E-06	0.000348	0.98141775
TACC3	-5.624488531	1.88E-06	0.000374	0.8173977
JMJD3	-5.621249046	1.90E-06	0.000374	0.84296575
USO1	5.61249382	1.96E-06	0.000381	-1.19786915
RBBP9	5.598029916	2.05E-06	0.000391	-0.90446745
RNF150	-5.594324922	2.07E-06	0.000391	0.9035378
NEUROG1	-5.597042722	2.05E-06	0.000391	1.2743006
OLIG2	-5.58658948	2.12E-06	0.000396	0.74226495
2610109H07RIK	-5.550017973	2.38E-06	0.00044	0.5284298
WDR5B	-5.543554422	2.43E-06	0.00044	0.91992785
ANKRD2	-5.54499121	2.42E-06	0.00044	1.5915097
ASPN	-5.529281908	2.54E-06	0.000451	0.94648205
OLFR672	-5.53168318	2.52E-06	0.000451	1.08049015
RABL2A	5.5050571	2.75E-06	0.000482	-0.8613975
LOC665566	-5.501406081	2.78E-06	0.000483	0.992942
WDR51B	5.483479051	2.94E-06	0.000489	-1.11282425
RPA3	5.482689123	2.95E-06	0.000489	-0.9822409
2400006N03RIK	5.48885293	2.89E-06	0.000489	-0.9077983
DERA	5.4840774	2.93E-06	0.000489	-0.78566665
V1RD2	5.483854999	2.93E-06	0.000489	-0.6916938
NPY2R	-5.471892376	3.05E-06	0.000499	0.6370355
CNR1	-5.470445315	3.06E-06	0.000499	0.6670843
ELOVL2	5.461461993	3.15E-06	0.000509	-1.12226115
ALG14	5.42069891	3.58E-06	0.000544	-1.31831335
1110058L19RIK	5.421941303	3.57E-06	0.000544	-1.29534415
FKBP10	5.431801198	3.46E-06	0.000544	-0.99609935
D030028O16RIK	5.423438198	3.55E-06	0.000544	-0.93155185
TUBGCP5	-5.424525776	3.54E-06	0.000544	0.53765475
TGM4	-5.422957147	3.55E-06	0.000544	1.25369715
CD34	-5.428613511	3.49E-06	0.000544	1.44671405
KIFC3	5.406283202	3.75E-06	0.00056	-0.75350905
CCDC117	5.406403676	3.74E-06	0.00056	-0.7050132
5730494N06RIK	5.399561345	3.83E-06	0.000563	-1.01583225
SERPINB3D	-5.40222756	3.79E-06	0.000563	0.43108245
IL12RB1	5.392350483	3.91E-06	0.000571	-0.36843605
BC085271	5.379589041	4.07E-06	0.000575	-1.21996115
TRIP4	5.376966068	4.11E-06	0.000575	-0.88241435
PPP1CC	-5.387757032	3.97E-06	0.000575	0.4105048
OLFR1491	-5.374961942	4.13E-06	0.000575	0.4789762
NUP98	-5.372678613	4.16E-06	0.000575	0.85038655
C1QTNF2	-5.380224103	4.07E-06	0.000575	0.9921069
OLFR550	-5.376428868	4.11E-06	0.000575	1.1499565
NEFM	-5.369034269	4.21E-06	0.000577	0.6705462
RAG1	-5.356962833	4.37E-06	0.000595	1.0149483
OLFR1195	-5.328589738	4.78E-06	0.000646	1.148319
EG212225	-5.323411242	4.86E-06	0.000652	0.4967776
OLFR244	-5.318879572	4.93E-06	0.000656	1.35641465
PRKRA	5.313156991	5.02E-06	0.000663	-1.20537585
9830107B12RIK	5.30353158	5.17E-06	0.000674	-0.3479359
KLK7	-5.303457592	5.17E-06	0.000674	0.7996915
AAAS	5.294737624	5.32E-06	0.000684	-0.9992314
UGT2B34	5.293957508	5.33E-06	0.000684	-0.93720145
2610024G14RIK	5.287751148	5.44E-06	0.000693	-0.6464321
OLFR659	-5.283530848	5.51E-06	0.000697	1.0797187
1700071K01RIK	5.279220526	5.58E-06	0.000702	-0.78289205
WNT9B	-5.271285277	5.72E-06	0.000715	0.714037
NDUFC2	5.267243332	5.80E-06	0.000719	-1.70138235
4930547N16RIK	-5.260955276	5.91E-06	0.000728	0.6618362
TUBD1	5.242086511	6.27E-06	0.000763	-0.74104625
KCTD8	-5.241814552	6.28E-06	0.000763	1.238959
ASCC3L1	5.237291308	6.37E-06	0.000768	-0.8395431
OLFR371	-5.235040955	6.41E-06	0.000769	0.62688515
TIGD2	5.206702783	7.01E-06	0.000835	-0.89670185
PKN2	5.201249414	7.13E-06	0.000844	-0.63049905
BXDC1	5.18750259	7.45E-06	0.000875	-0.4323962
MTAP9	-5.184065174	7.53E-06	0.000879	0.53182285
POLR3G	5.181332199	7.59E-06	0.000881	-0.8193837
STK24	5.178667835	7.65E-06	0.000882	-0.8878051
UBASH3B	-5.174369835	7.76E-06	0.000884	0.7485338
2410004A20RIK	-5.173853399	7.77E-06	0.000884	1.10877995
MAD2L1BP	5.1715432	7.83E-06	0.000885	-0.8171753
ETNK2	-5.166389961	7.95E-06	0.000894	1.1542881
SLC22A9	-5.161374559	8.08E-06	0.000903	0.588277
E330016A19RIK	-5.153636331	8.28E-06	0.000919	0.67624835
NDUFB7	5.123988918	9.08E-06	0.000998	-0.9911863
SCYL1BP1	-5.123477902	9.10E-06	0.000998	0.61724005
ZDHHC22	-5.114909484	9.35E-06	0.001016804	0.46660895
OLFR980	-5.113633249	9.38E-06	0.001016804	0.6375101
NUCB2	5.109462622	9.51E-06	0.001024025	-0.65265395
BZW1	5.100692508	9.77E-06	0.001044283	-1.32413975
BIRC4	-5.099415182	9.81E-06	0.001044283	0.67952425
NCALD	5.095850764	9.92E-06	0.001049813	-1.24962875
UBE2Q1	5.089408051	1.01E-05	0.001064948	-1.01830925
ENPEP	-5.08583977	1.02E-05	0.00107067	0.96103945
FDXR	-5.077865842	1.05E-05	0.001091384	0.8723638
T2	-5.075200978	1.06E-05	0.001094223	0.41007785
NR0B2	-5.064784424	1.09E-05	0.001120414	0.57748945
CNGA4	-5.063995288	1.10E-05	0.001120414	0.7919891
HCST	5.059774732	1.11E-05	0.00112677	-0.8711394
4930488L10RIK	-5.058588313	1.11E-05	0.00112677	0.4254023
OLFR1105	-5.054342127	1.13E-05	0.001135473	0.95446625
PCGF2	-5.033302655	1.21E-05	0.001205884	0.5513729
TM9SF3	-5.028719479	1.22E-05	0.00121654	0.85606195
FOXH1	-5.016372142	1.27E-05	0.001257429	0.34233515
OLFR1231	-5.013104677	1.28E-05	0.001263411	0.8132585
CLEC7A	-5.00506771	1.32E-05	0.001288489	0.5588353
DNM1L	5.001080637	1.33E-05	0.001290662	-0.821693
6230409E13RIK	-5.001461641	1.33E-05	0.001290662	0.7195037
SUV39H1	4.991895314	1.37E-05	0.001318687	-0.78251835
IFNAB	4.990781942	1.38E-05	0.001318687	-0.38876735
2410166I05RIK	-4.986628768	1.40E-05	0.001328845	0.92758305
2600011C06RIK	4.978549366	1.43E-05	0.001355607	-0.3937449
APAF1	4.972856984	1.46E-05	0.001365575	-0.8108732
AKP5	-4.972926649	1.46E-05	0.001365575	0.60473525
M6PR	4.96136583	1.51E-05	0.001408066	-0.9137847
2610029G23RIK	4.951027638	1.56E-05	0.001412402	-0.5325939
OLFR1049	-4.952001034	1.55E-05	0.001412402	0.41038495
DDX50	-4.950836206	1.56E-05	0.001412402	0.44968745
ELMO2	-4.954643297	1.54E-05	0.001412402	0.5838254
OLFR113	-4.950601358	1.56E-05	0.001412402	0.68300275
KRT78	-4.956755994	1.53E-05	0.001412402	1.069344
4933426M11RIK	4.943388408	1.60E-05	0.001437303	-0.98213695
PLAGL1	-4.936729955	1.63E-05	0.001460148	0.40096975
OLFR171	4.923447148	1.70E-05	0.00151429	-0.3339872
SKIV2L2	4.921483664	1.71E-05	0.001516102	-0.98360715
PRODH	-4.918294323	1.73E-05	0.001523755	1.0339853
MTRF1L	4.898653815	1.83E-05	0.001593246	-0.9098903
OAS1B	4.89774555	1.84E-05	0.001593246	-0.50285265
OLFR782	4.898844001	1.83E-05	0.001593246	-0.29783005
PNPT1	-4.902075509	1.82E-05	0.001593246	0.5549613
TEX19	-4.884374365	1.92E-05	0.001652965	0.67221575
OLFR70	4.877273262	1.96E-05	0.001673562	-0.4178322
KCNG1	-4.877458533	1.96E-05	0.001673562	0.7360046
D4WSU114E	-4.875825602	1.97E-05	0.001673562	1.0906732
5830433M19RIK	-4.872518962	1.99E-05	0.001682945	0.5407317
CDK5	4.86959463	2.01E-05	0.001690406	-0.96588745
RFXANK	4.856490499	2.09E-05	0.001744403	-0.8663018
DEPDC5	4.856833306	2.09E-05	0.001744403	-0.56159295
D0H8S2298E	4.850548266	2.13E-05	0.001768737	-0.9257993
AMFR	4.838427348	2.21E-05	0.001813512	-0.6286719
CCBL2	4.83518846	2.23E-05	0.001813512	-0.62281685
ZBTB8OS	4.83698799	2.22E-05	0.001813512	-0.56683865
HIST2H4	4.835694121	2.23E-05	0.001813512	-0.53111095
FOXK1	-4.83702593	2.22E-05	0.001813512	0.59507975
ZKSCAN2	-4.833617298	2.25E-05	0.00181424	0.6268358
UGCG	4.828008015	2.28E-05	0.001821693	-1.50037705
VPS45	4.830099306	2.27E-05	0.001821693	-0.76429335
CRISP3	-4.829382678	2.28E-05	0.001821693	1.28686315
BC023814	4.82457024	2.31E-05	0.001825144	-0.55773115
TAF8	-4.825667378	2.30E-05	0.001825144	0.8944551
OLFR690	-4.81617531	2.37E-05	0.001865145	0.784276
LOC100039532	4.814551097	2.38E-05	0.001866448	-1.06371025
MTMR1	4.811335231	2.41E-05	0.001868971	-0.85275195
OLFR825	-4.811652023	2.40E-05	0.001868971	0.73923885
LOC100046891	4.808139801	2.43E-05	0.001873432	-1.224826
1190005P17RIK	4.807809407	2.43E-05	0.001873432	-0.41535845
PES1	4.796320217	2.52E-05	0.001918239	-0.7877309
TIA1	4.795881705	2.52E-05	0.001918239	-0.7859237
BC032265	-4.794738097	2.53E-05	0.001918239	0.55504115
RALGDS	-4.795255413	2.53E-05	0.001918239	0.9735178
CFDP1	4.78937385	2.58E-05	0.00192199	-0.7566409
NRXN2	4.788195001	2.59E-05	0.00192199	-0.6844328
FGFR2	-4.787424931	2.59E-05	0.00192199	0.43039625
AHRR	-4.787783493	2.59E-05	0.00192199	0.7721351
KCNJ3	-4.790743986	2.56E-05	0.00192199	0.958757
IFT74	4.785395246	2.61E-05	0.001926219	-0.562424
MIP	-4.778918893	2.66E-05	0.001957258	0.71564545
RELT	-4.774617617	2.70E-05	0.001975472	0.75865245
OLFR910	4.770293979	2.73E-05	0.001986013	-0.47597985
ZFP2	-4.770926146	2.73E-05	0.001986013	0.43838745
COL4A6	-4.767043061	2.76E-05	0.001998077	0.9261422
IFI203	-4.764258464	2.78E-05	0.002007344	0.68560715
5430407P10RIK	-4.76172076	2.81E-05	0.002015144	1.0556925
OLFR1471	-4.748433485	2.92E-05	0.002091418	1.01501335
SIAT9	-4.74450676	2.96E-05	0.002108641	0.8525909
UBE1C	4.734536762	3.05E-05	0.002157673	-0.72653055
NKX2-5	-4.735060183	3.05E-05	0.002157673	0.83474425
OLFR891	-4.730510034	3.09E-05	0.002176199	0.72249795
IREB2	-4.722183995	3.17E-05	0.002219323	0.7327851
DDR1	-4.72165284	3.18E-05	0.002219323	0.9735002
ALB	4.719627059	3.20E-05	0.002220604	-0.9000217
OLFR1463	-4.71676762	3.22E-05	0.002220604	0.37667955
RAET1E	-4.718823848	3.20E-05	0.002220604	0.5790162
STXBP5L	-4.716505909	3.23E-05	0.002220604	0.8782814
PCOLN3	-4.714303573	3.25E-05	0.002227295	0.9028882
METTL8	4.711570213	3.28E-05	0.002237704	-0.5748063
TFDP1	4.708465293	3.31E-05	0.002242344	-0.67905645
SLC45A2	-4.709402456	3.30E-05	0.002242344	0.41219935
ABHD5	4.698446405	3.41E-05	0.002304169	-1.1513694
TMEM27	-4.695207284	3.45E-05	0.002310085	0.430803
KLRA15	-4.696120879	3.44E-05	0.002310085	0.58166385
DUSP15	-4.68930273	3.51E-05	0.002343889	0.9737413
VASN	4.686178597	3.54E-05	0.002357894	-0.95252455
NDC80	-4.68173871	3.59E-05	0.002381661	0.68563805
2810433K01RIK	-4.674075532	3.68E-05	0.002429729	0.34970505
KRT77	-4.670849351	3.72E-05	0.0024451	0.37617645
SNX5	-4.664834619	3.78E-05	0.002481843	0.3471225
OGFOD1	4.661411775	3.83E-05	0.002499114	-0.7472779
OVOL2	-4.659140088	3.85E-05	0.002507622	0.75470425
TBL1XR1	-4.65249513	3.93E-05	0.002534164	0.44326295
OLFR250	-4.653218487	3.92E-05	0.002534164	0.5322559
WDR85	-4.652240482	3.93E-05	0.002534164	0.9260959
NKIRAS2	4.650334042	3.96E-05	0.002540054	-0.83362635
GPR124	4.648428031	3.98E-05	0.002545986	-0.43996605
SAV1	4.642097873	4.06E-05	0.002586976	-1.03447075
SEC61B	4.638349915	4.11E-05	0.002607827	-1.10151545
RND3	4.635342034	4.14E-05	0.002613818	-0.8345092
UGT1A6A	4.635333692	4.15E-05	0.002613818	-0.7179356
B230120H23RIK	-4.619039959	4.36E-05	0.002729226	0.52660055
OLFR351	-4.619525652	4.35E-05	0.002729226	0.6771485
CBX8	4.615428581	4.41E-05	0.002734344	-0.82006835
EPHA7	-4.616425493	4.39E-05	0.002734344	0.37989925
TBRG4	-4.615074369	4.41E-05	0.002734344	0.72739765
HOMEZ	-4.602827034	4.58E-05	0.002829609	0.66561745
FGF8	4.598504845	4.64E-05	0.002848018	-0.6320411
CST6	-4.599363164	4.63E-05	0.002848018	0.39437805
MILL2	4.596137169	4.68E-05	0.002859129	-0.26933475
VGLL2	-4.591207446	4.75E-05	0.002873651	0.52142285
TNPO2	-4.593115419	4.72E-05	0.002873651	0.67957195
RNF122	-4.591823586	4.74E-05	0.002873651	0.7045502
SERPIND1	4.588664067	4.78E-05	0.002886544	-0.97946125
NEUROD2	-4.586679115	4.81E-05	0.002894553	0.634075
CNGA1	-4.584512038	4.85E-05	0.00290424	0.84594235
KPNA1	4.579425777	4.92E-05	0.002940234	-0.9402747
PRPS1	4.576077347	4.97E-05	0.002958048	-1.57299135
KCNN2	-4.575316604	4.99E-05	0.002958048	0.84155195
GPR111	-4.571238771	5.05E-05	0.002985529	0.64957465
ABCB11	4.564108908	5.16E-05	0.002999436	-1.5517205
ACTR3	4.566527534	5.12E-05	0.002999436	-1.14500805
2310036D22RIK	4.565182388	5.14E-05	0.002999436	-1.09113845
APRIN	4.568099599	5.10E-05	0.002999436	-1.09098225
GIMAP4	4.563398767	5.17E-05	0.002999436	-0.2963322
EG328280	-4.565788548	5.13E-05	0.002999436	0.631302
RORB	-4.560043364	5.22E-05	0.003020799	0.6935838
ANXA4	4.55768677	5.26E-05	0.003023402	-0.8359073
BNC2	-4.55838416	5.25E-05	0.003023402	0.67891525
MAP4K5	4.548824022	5.41E-05	0.003096895	-0.3156861
GJD4	-4.54480667	5.47E-05	0.003125393	0.58932055
EG432637	-4.543510297	5.50E-05	0.003127973	0.66944755
A930005I04RIK	4.540197671	5.55E-05	0.003140075	-0.8704461
GDF6	-4.539188036	5.57E-05	0.003140075	0.34599765
DMRT2	-4.539388535	5.57E-05	0.003140075	0.78921135
WFS1	4.537178828	5.60E-05	0.003149662	-0.99495895
AI847670	4.529202731	5.74E-05	0.003182564	-1.19580245
DPH2	4.530505713	5.72E-05	0.003182564	-0.76509505
STT3B	4.528424415	5.76E-05	0.003182564	-0.7263678
5330421F07RIK	4.527434138	5.77E-05	0.003182564	-0.2500925
KLRI2	-4.530840487	5.71E-05	0.003182564	0.56037885
HS6ST3	-4.526769652	5.79E-05	0.003182564	0.9666006
PCDHB8	-4.530023431	5.73E-05	0.003182564	1.352317
PCDHA6	-4.52309465	5.85E-05	0.003203245	0.53834555
JMY	-4.522676745	5.86E-05	0.003203245	0.91970825
OLFR1161	-4.52045053	5.90E-05	0.003215447	0.53568495
ARL8A	4.518130783	5.94E-05	0.003228647	-1.2605439
EFR3A	4.511324513	6.07E-05	0.003276955	-0.56111905
SNCAIP	-4.51167318	6.06E-05	0.003276955	0.3672317
NHLRC3	4.508811332	6.11E-05	0.003292434	-0.7109685
PGRMC1	4.506698094	6.15E-05	0.003294191	-1.26211185
1700061G19RIK	-4.50686232	6.15E-05	0.003294191	0.8899709
CKAP2L	-4.503098643	6.22E-05	0.003320853	0.4381834
TSFM	4.500598739	6.27E-05	0.003336511	-0.94819775
HIST1H2AN	4.49441756	6.39E-05	0.003340241	-1.51966
1810009N02RIK	4.495053174	6.38E-05	0.003340241	-1.3860129
FRMD6	4.497029807	6.34E-05	0.003340241	-1.00009455
PVRL1	4.495557262	6.37E-05	0.003340241	-0.74480305
P42POP	4.492685875	6.42E-05	0.003340241	-0.51057185
GM75	-4.492630852	6.42E-05	0.003340241	0.33352795
USP8	-4.493006589	6.42E-05	0.003340241	0.5069247
PAPD4	-4.496175658	6.35E-05	0.003340241	0.8035619
OTTMUSG00000005523	4.488939825	6.50E-05	0.003368479	-0.68291745
THSD4	4.484406508	6.59E-05	0.003391414	-0.51754975
TCF20	-4.482772582	6.62E-05	0.003391414	0.41095835
SMCR8	-4.482067713	6.63E-05	0.003391414	0.5822876
OLFR169	-4.482451954	6.63E-05	0.003391414	0.61614555
SAA2	-4.48488394	6.58E-05	0.003391414	2.441069
2810030E01RIK	-4.480064898	6.67E-05	0.003402628	0.7497153
NRIP1	4.478489181	6.71E-05	0.00340945	-0.5640422
WDR54	4.475577008	6.77E-05	0.003430293	-0.7742088
GEMIN7	4.470452745	6.87E-05	0.003474689	-0.7286307
ADH7	4.463139885	7.03E-05	0.00349302	-1.1103437
RAB3IP	4.461494182	7.06E-05	0.00349302	-0.8992052
NARS2	4.466023916	6.97E-05	0.00349302	-0.71826975
NARG1L	4.4643328	7.00E-05	0.00349302	-0.60544505
C230052I12RIK	4.466821054	6.95E-05	0.00349302	-0.5931086
RASGRP2	-4.464547181	7.00E-05	0.00349302	0.5355653
1300003B13RIK	-4.461619809	7.06E-05	0.00349302	0.55935265
RIC3	-4.463481102	7.02E-05	0.00349302	0.5978218
SERPINB6B	-4.458667745	7.13E-05	0.003512047	0.36361525
YIPF4	-4.457930228	7.14E-05	0.003512047	0.7665295
MOBKL2B	4.454510331	7.22E-05	0.003524256	-1.095995
OLFR736	-4.454353632	7.22E-05	0.003524256	0.4589707
SLC43A2	-4.454133764	7.22E-05	0.003524256	0.60077755
SKP1A	4.451475567	7.28E-05	0.003543415	-1.16243005
SNRPD1	4.449024466	7.34E-05	0.003549822	-1.00964055
PUS7L	4.448978331	7.34E-05	0.003549822	-0.5249794
VPS41	4.4478751	7.36E-05	0.003549822	-0.50568045
A030003K21RIK	-4.447378771	7.38E-05	0.003549822	1.0188464
LOC100047443	4.44471777	7.44E-05	0.003563354	-0.65659215
GPR27	4.442787168	7.48E-05	0.003563354	-0.35913155
SRP19	-4.443535387	7.46E-05	0.003563354	0.45518055
ADAMTS3	-4.442663244	7.48E-05	0.003563354	0.6055954
HTR2A	-4.441351743	7.51E-05	0.003568248	0.69309035
SSX9	-4.439969999	7.54E-05	0.003573939	0.6254356
ZFYVE1	4.437028174	7.61E-05	0.003596734	-1.07155345
AI317395	4.432666588	7.71E-05	0.003613909	-0.93539675
TBC1D9B	4.426177935	7.87E-05	0.003613909	-0.8683117
ELK4	-4.426406988	7.86E-05	0.003613909	0.34207425
CEP110	-4.431256866	7.75E-05	0.003613909	0.36004265
OSBPL1A	-4.43003902	7.78E-05	0.003613909	0.53824725
KCTD18	-4.432337979	7.72E-05	0.003613909	0.57618105
NCOA3	-4.430347237	7.77E-05	0.003613909	0.59133465
OLFR1347	-4.431695656	7.74E-05	0.003613909	0.62445925
PIM1	-4.426716731	7.85E-05	0.003613909	0.6938145
OAS1E	-4.428592527	7.81E-05	0.003613909	0.7375758
FGF23	-4.427926219	7.83E-05	0.003613909	1.04157955
GCS1	4.423982244	7.92E-05	0.003628963	-1.21741405
SS18	4.418611732	8.05E-05	0.003642727	-0.76583975
NCLN	-4.419497484	8.03E-05	0.003642727	0.46286585
CIAPIN1	-4.421852358	7.97E-05	0.003642727	0.48220295
WRNIP1	-4.419167521	8.04E-05	0.003642727	0.48305425
SLC1A7	-4.42045431	8.01E-05	0.003642727	0.66517535
OLFR1206	-4.417056104	8.09E-05	0.003648624	0.46248105
NPTX1	-4.416443629	8.10E-05	0.003648624	0.53750485
RPP38	4.413788603	8.17E-05	0.003654589	-0.6958246
4933424B01RIK	4.413841285	8.17E-05	0.003654589	-0.47494995
TMEM132D	-4.413466464	8.18E-05	0.003654589	1.0002127
SRP72	4.40554187	8.38E-05	0.00373463	-1.00250315
RHD	-4.404184336	8.41E-05	0.003740883	0.53841135
6330503K22RIK	4.402057583	8.47E-05	0.003753737	-0.83396665
OLFR1087	-4.401447043	8.48E-05	0.003753737	0.87611345
ALG11	4.399237346	8.54E-05	0.003769851	-0.7682174
CCDC127	4.397101236	8.60E-05	0.003785205	-0.7100111
E330009P21RIK	-4.396270248	8.62E-05	0.003785578	0.60565235
9530058B02RIK	-4.391559108	8.74E-05	0.003830932	0.5348438
AFM	4.390694278	8.77E-05	0.003831746	-1.4876828
RFC4	-4.388959186	8.81E-05	0.003842741	0.95634895
FOXL2	-4.387888262	8.84E-05	0.00384601	0.6801426
KEL	-4.38677618	8.87E-05	0.003849786	0.5081295
SLC28A1	-4.385156688	8.91E-05	0.003859539	0.7614843
RPO1-1	4.383473084	8.96E-05	0.00387009	-1.0529594
CYP2D13	4.381474351	9.01E-05	0.003877926	-1.34671715
HOXA13	-4.381241704	9.02E-05	0.003877926	0.7235212
SAP30	4.37776871	9.12E-05	0.0039098	-0.87233365
LOC100045522	4.371122103	9.30E-05	0.003980151	-0.69231605
OLFR1201	-4.368788216	9.37E-05	0.003999022	0.46011325
OLFR1219	-4.367571456	9.40E-05	0.004004388	0.9202997
RLBP1	-4.366012161	9.45E-05	0.004013957	0.98708655
MSX3	-4.361821041	9.57E-05	0.00405586	0.5959471
ZFP334	4.360703608	9.60E-05	0.004060139	-0.46940835
SPRY4	4.358131283	9.68E-05	0.004063495	-0.7090899
GK5	-4.358324299	9.67E-05	0.004063495	0.47056425
PSPC1	-4.358897798	9.65E-05	0.004063495	0.94531085
ANKRD13B	4.35646906	9.73E-05	0.004074601	-0.752025
PUM1	4.35422279	9.79E-05	0.004093008	-0.81070215
KLHDC5	-4.352164773	9.85E-05	0.004109168	0.7563975
TRAF3	4.349839951	9.92E-05	0.00412731	-0.4058697
FCRL5	-4.349198423	9.94E-05	0.00412731	1.1058643
TTC16	-4.346918244	1.00E-04	0.004146458	0.7716258
FCHO1	4.344919367	1.01E-04	0.004152677	-1.00651605
BMP5	-4.345413265	1.01E-04	0.004152677	1.11957675
PEX14	4.342984938	1.01E-04	0.004154406	-1.37225485
MYO1B	4.342289206	1.02E-04	0.004154406	-0.963028
GRLF1	4.340387203	1.02E-04	0.004154406	-0.67974445
DSG1B	-4.339567394	1.02E-04	0.004154406	0.46211265
OLFR194	-4.341365888	1.02E-04	0.004154406	0.5447938
EPRS	-4.341285533	1.02E-04	0.004154406	0.5666358
EG330403	-4.340049995	1.02E-04	0.004154406	0.6270458
ZFP644	4.338755278	1.03E-04	0.004155335	-1.06260625
YAP1	4.335430345	1.04E-04	0.004160219	-0.81588135
FBXO42	4.336359391	1.03E-04	0.004160219	-0.6053551
KRTAP4-7	-4.335592792	1.04E-04	0.004160219	0.3117964
CCNT1	-4.33609164	1.03E-04	0.004160219	0.7862761
CR2	-4.333854801	1.04E-04	0.004170893	0.44779805
ASH2L	4.33288101	1.04E-04	0.004173992	-0.5545622
D4BWG0951E	4.3288459	1.06E-04	0.004206792	-1.2519729
KISS1	-4.329171897	1.06E-04	0.004206792	1.1961046
TK1	-4.326287655	1.07E-04	0.004230241	0.7261662
SETD7	-4.324729768	1.07E-04	0.00424096	0.4679833
GUCA1A	4.323036299	1.08E-04	0.004244206	-1.1750797
BDKRB2	-4.323286788	1.08E-04	0.004244206	0.50978405
ABCA5	4.321062147	1.08E-04	0.004260387	-0.50103315
1700029I08RIK	-4.316995715	1.10E-04	0.00430384	0.5874927
LOC677205	4.314750732	1.10E-04	0.004323826	-1.13227215
DYNLT3	4.312428	1.11E-04	0.004338159	-1.33421875
CBX5	-4.312231546	1.11E-04	0.004338159	0.6533924
THUMPD1	4.309952917	1.12E-04	0.004358801	-1.0355029
YWHAE	4.30762254	1.13E-04	0.004361524	-0.47048865
OLFR574	4.307712711	1.13E-04	0.004361524	-0.4263198
OLFR324	-4.30893113	1.12E-04	0.004361524	0.7654857
RAB3A	-4.306280909	1.13E-04	0.004369937	0.7398641
DSG4	-4.299941321	1.15E-04	0.004438423	0.43548715
THEM5	-4.299736909	1.16E-04	0.004438423	0.56421845
HLX	4.298908164	1.16E-04	0.00444014	-1.024116
TM4SF4	4.296531737	1.17E-04	0.00445331	-1.06137095
APC2	-4.296872191	1.17E-04	0.00445331	0.5910866
TAGLN3	4.295000755	1.17E-04	0.004462411	-0.6503228
WDR45	4.294325726	1.17E-04	0.004462411	-0.44719305
CALCR	-4.293771213	1.18E-04	0.004462411	0.54959945
LIG3	4.291560956	1.18E-04	0.004473587	-1.0132695
LOC100046777	-4.291795458	1.18E-04	0.004473587	0.9321894
FNDC3B	4.28889518	1.19E-04	0.004491046	-0.9160163
PSMC4	-4.289473603	1.19E-04	0.004491046	0.55940765
1700017N19RIK	-4.283218346	1.21E-04	0.004559315	1.09036455
KLHL12	4.280672503	1.22E-04	0.00457555	-0.4827458
TRAPPC2L	-4.280859161	1.22E-04	0.00457555	0.4641317
RNASEK	4.27984622	1.23E-04	0.004577084	-0.96878615
LGR5	4.277861531	1.23E-04	0.004577084	-0.7149589
FXYD7	-4.277838231	1.23E-04	0.004577084	0.4515503
HCRTR1	-4.278771964	1.23E-04	0.004577084	0.8363476
OLFR1258	-4.274131504	1.25E-04	0.00461917	0.77070315
GTF2E1	4.272052496	1.26E-04	0.004638787	-0.90747905
TERF2	4.270767142	1.26E-04	0.004647348	-0.74869465
TOP3A	-4.268125134	1.27E-04	0.00467506	0.8269623
SMARCAD1	4.262880913	1.29E-04	0.004724348	-0.99333555
ERGIC2	4.2630482	1.29E-04	0.004724348	-0.89332905
ZFP568	-4.262638731	1.29E-04	0.004724348	1.01861795
SURF2	4.26023703	1.30E-04	0.004730059	-1.2065487
SPRED1	4.26034817	1.30E-04	0.004730059	-0.99028345
COIL	4.261066439	1.30E-04	0.004730059	-0.68987475
4933407I18RIK	-4.258176444	1.31E-04	0.004750032	0.69088685
A630047E20RIK	-4.256887123	1.31E-04	0.004759014	1.0397173
F13B	-4.255357375	1.32E-04	0.004771492	0.6376112
UBE3C	4.253690687	1.33E-04	0.004776482	-1.04193965
ATP2B1	-4.254143346	1.33E-04	0.004776482	0.8847303
OLFR608	-4.25216118	1.33E-04	0.004789055	0.660213
PILRA	4.249558328	1.34E-04	0.00481725	-0.5540827
OLFR1214	-4.24888673	1.35E-04	0.00481748	0.5562219
LIFR	4.24743741	1.35E-04	0.004819536	-1.06270695
TUBB6	4.247712625	1.35E-04	0.004819536	-1.0400894
DAPK1	4.244535749	1.36E-04	0.004852346	-1.00935025
PLDN	4.243139794	1.37E-04	0.004860516	-0.6401222
SLC16A4	-4.242677363	1.37E-04	0.004860516	0.85449815
CYP2C70	4.240623243	1.38E-04	0.004866833	-1.16226115
BAZ1B	4.240305082	1.38E-04	0.004866833	-0.55412465
AGXT2L1	-4.241297678	1.38E-04	0.004866833	1.09004135
KCTD3	-4.239648902	1.38E-04	0.004867001	0.67696705
B930041G04	-4.238702119	1.39E-04	0.004871453	0.60359335
LOH11CR2A	4.237049204	1.40E-04	0.004886316	-0.79662575
TOMM40	4.235716959	1.40E-04	0.004896505	-0.47108085
GLT1D1	-4.230595608	1.42E-04	0.004963077	0.45745555
NXT2	4.228504982	1.43E-04	0.004965732	-0.9400162
REG4	-4.229701156	1.43E-04	0.004965732	0.3214194
EPO	-4.228942412	1.43E-04	0.004965732	1.09342005
PDCD2L	4.225548483	1.45E-04	0.005000573	-1.24473495
V1RA7	-4.224413036	1.45E-04	0.005008128	0.74228895
LOC56628	4.221407954	1.46E-04	0.005044029	-0.897666
RPS19BP1	4.219437137	1.47E-04	0.005064403	-0.79923055
UBE4A	4.218645521	1.48E-04	0.005066855	-0.6136377
SPINK12	-4.213669215	1.50E-04	0.005133583	0.8568428
VEPH1	-4.212878439	1.50E-04	0.005136087	0.52111405
DCUN1D2	4.207386263	1.53E-04	0.005197728	-0.8606241
C85492	4.206803353	1.53E-04	0.005197728	-0.57530665
MAP3K7IP1	-4.206759706	1.53E-04	0.005197728	0.58222815
MCCC1	-4.206409816	1.53E-04	0.005197728	0.744855
NANOS3	-4.203508679	1.54E-04	0.005233465	0.28350045
1500031L02RIK	4.200218515	1.56E-04	0.005265783	-0.7821549
RASSF10	-4.20035099	1.56E-04	0.005265783	1.1584241
E130319B15RIK	-4.198373198	1.57E-04	0.005285221	0.3038274
CLEC4A1	4.194661565	1.59E-04	0.00531207	-0.98460125
V1RG11	4.195164352	1.58E-04	0.00531207	-0.4637897
GRIA1	-4.194219044	1.59E-04	0.00531207	0.5068017
SLAMF7	-4.194878002	1.58E-04	0.00531207	0.6918118
1110031B11RIK	-4.192658806	1.60E-04	0.005327192	0.4493653
TRMT12	4.190992526	1.60E-04	0.005344076	-0.6686087
RCE1	4.189243925	1.61E-04	0.005352516	-0.86921975
ARPM1	-4.189508528	1.61E-04	0.005352516	0.4875468
AGBL2	-4.187637803	1.62E-04	0.005368558	0.6568845
SMUG1	4.183194747	1.64E-04	0.00540467	-0.79584535
SLC26A2	-4.183678875	1.64E-04	0.00540467	0.3694612
CCDC83	-4.18176772	1.65E-04	0.00540467	0.48167755
WDR13	-4.182337242	1.65E-04	0.00540467	0.72814535
APOBEC3	-4.182580638	1.64E-04	0.00540467	0.7490745
WDR34	-4.183554958	1.64E-04	0.00540467	0.89873115
C1QL4	4.18007288	1.66E-04	0.005415343	-0.36404175
HCRT	-4.179906434	1.66E-04	0.005415343	1.029295
SEC24D	4.176003909	1.68E-04	0.005459461	-0.66424535
XLR5A	-4.176338491	1.68E-04	0.005459461	1.0750617
PDGFRL	4.17380947	1.69E-04	0.005485678	-0.21971385
KAP	-4.167729355	1.72E-04	0.005556765	0.3892535
LOC100045117	-4.168268104	1.72E-04	0.005556765	0.7286419
ZBP1	-4.16829427	1.72E-04	0.005556765	0.7297084
OTC	-4.166232146	1.73E-04	0.005571832	0.73809635
DCP1B	4.164863349	1.73E-04	0.005584805	-0.75220545
BBS1	4.16296808	1.74E-04	0.005590473	-0.5154387
CDCP2	-4.162366281	1.75E-04	0.005590473	0.3634701
ABCB8	-4.163804521	1.74E-04	0.005590473	0.427435
CYFIP2	-4.162160756	1.75E-04	0.005590473	0.88725445
CAMP	4.159464237	1.76E-04	0.005625926	-1.4021626
SNIP1	4.158511963	1.77E-04	0.005632081	-0.69232465
ANG	4.157178686	1.77E-04	0.005644704	-2.7445584
ASB3	4.155834109	1.78E-04	0.005655145	-0.4300592
OLFR145	-4.155391968	1.78E-04	0.005655145	0.8470021
NPY1R	4.154193642	1.79E-04	0.005655687	-0.69245555
LOC100044812	-4.154354693	1.79E-04	0.005655687	0.6140322
MAX	-4.150464779	1.81E-04	0.00570281	0.80605195
STT3A	-4.150262829	1.81E-04	0.00570281	0.87459025
PDIA4	4.148488132	1.82E-04	0.005715853	-1.2675934
VWC2	-4.148341801	1.82E-04	0.005715853	0.3738335
A630054L15RIK	4.146797169	1.83E-04	0.005729505	-0.5776285
GPRC2A-RS5	-4.145814831	1.84E-04	0.005729505	0.23968385
GDPD5	-4.145950174	1.84E-04	0.005729505	1.16946165
YAF2	4.14360764	1.85E-04	0.005739783	-0.84734945
RGP1	4.143494359	1.85E-04	0.005739783	-0.34829525
SLAC2B	-4.144178254	1.85E-04	0.005739783	0.5712329
9430023L20RIK	-4.140482767	1.87E-04	0.005781874	0.6151738
CBLC	4.139651182	1.87E-04	0.005783947	-1.112478
GM239	-4.138798697	1.88E-04	0.005783947	0.5448226
COL11A1	-4.138652076	1.88E-04	0.005783947	0.5504434
PPARD	-4.137130853	1.88E-04	0.005800472	0.5297317
EFNB2	-4.135970488	1.89E-04	0.005810776	0.43123
KCTD5	4.134055262	1.90E-04	0.005834283	-0.74062805
LOC382243	-4.131460062	1.92E-04	0.005869832	0.5694847
TMEM16K	4.130385535	1.92E-04	0.005878792	-0.98059445
CCDC124	4.129521783	1.93E-04	0.005883934	-0.70110005
MTHFSD	-4.12896638	1.93E-04	0.005883934	0.48706495
PLEKHG4	4.126990494	1.94E-04	0.005898963	-0.67315765
RRP1B	-4.127332781	1.94E-04	0.005898963	0.67183145
D14ERTD171E	4.125860098	1.95E-04	0.005909032	-0.8475062
OLFR58	-4.124049467	1.96E-04	0.005931192	0.4609378
AHCTF1	4.122703177	1.97E-04	0.005935275	-1.3018995
FOXO6	-4.122882213	1.97E-04	0.005935275	0.5270871
TPST1	4.120932422	1.98E-04	0.005935703	-1.51409525
CMAS	4.11990433	1.98E-04	0.005935703	-1.1807144
COPG	4.120848428	1.98E-04	0.005935703	-0.43190225
OLFR943	4.120334181	1.98E-04	0.005935703	-0.2493484
OLFR914	-4.119947636	1.98E-04	0.005935703	0.58808695
TBC1D25	4.119250359	1.99E-04	0.005937509	-0.8269153
ZDHHC24	-4.118543082	1.99E-04	0.005940277	0.37864255
LRFN4	-4.113186744	2.02E-04	0.006026241	0.745106
OTUD5	4.112517503	2.03E-04	0.006026602	-1.2036607
SLC45A4	-4.11206796	2.03E-04	0.006026602	0.75912145
ARNTL2	-4.111043162	2.04E-04	0.006035196	0.5128443
ALDH2	4.11015464	2.04E-04	0.006041355	-1.41848675
CUEDC2	4.108010121	2.06E-04	0.006049445	-1.14373505
3300002I08RIK	4.108123609	2.06E-04	0.006049445	-0.68717405
1110017I16RIK	-4.107526707	2.06E-04	0.006049445	0.2578954
A130022J15RIK	-4.107738315	2.06E-04	0.006049445	0.79300115
MREG	4.105774134	2.07E-04	0.006061523	-0.98683675
MYL7	-4.105872934	2.07E-04	0.006061523	0.45799505
FABP5	-4.104726959	2.08E-04	0.006070693	0.63512585
AANAT	-4.099414618	2.11E-04	0.006157834	0.5761183
IFNA6	-4.097859364	2.12E-04	0.006176535	0.71918045
TIMM23	-4.095133679	2.14E-04	0.006208327	0.29821715
OLFR1381	-4.095062764	2.14E-04	0.006208327	0.35647925
CNFN	-4.091984366	2.16E-04	0.006255595	0.39746735
OLFR1280	-4.089533481	2.17E-04	0.006291435	0.34874385
9130211I03RIK	4.088791318	2.18E-04	0.006295311	-1.0573284
OLFR802	4.084741991	2.20E-04	0.006361664	-0.62258755
SFRS3	4.082290053	2.22E-04	0.006371622	-0.7057071
2010106G01RIK	4.081609417	2.22E-04	0.006371622	-0.5019252
SERPINB11	4.082840697	2.22E-04	0.006371622	-0.4268093
TAS2R131	-4.082490344	2.22E-04	0.006371622	0.3083579
MAB21L1	-4.081554598	2.23E-04	0.006371622	0.41040635
TNNC1	-4.07952491	2.24E-04	0.006400177	1.32106785
SLC2A9	-4.078407896	2.25E-04	0.006407961	0.47456965
6530406M24RIK	-4.078059285	2.25E-04	0.006407961	0.65196815
TRPC2	4.074491232	2.27E-04	0.006449768	-1.0394822
RPIA	4.074296915	2.27E-04	0.006449768	-0.8044104
GZMK	4.074984813	2.27E-04	0.006449768	-0.49167465
EG630579	-4.073662887	2.28E-04	0.006451855	0.3770078
SMCR7	-4.071797719	2.29E-04	0.006477683	0.43573415
RABGGTA	-4.070574684	2.30E-04	0.006487474	0.52905635
SPNA1	-4.070243878	2.30E-04	0.006487474	0.788759
PGLYRP1	4.069141308	2.31E-04	0.006498701	-1.10857515
RGS20	-4.066019219	2.33E-04	0.006549245	0.4007914
AW111922	-4.06509069	2.34E-04	0.006550419	0.6229379
OLFR403	-4.064918077	2.34E-04	0.006550419	0.9288224
OSTN	-4.062887387	2.35E-04	0.006579973	0.336438
1700047I17RIK1	4.061030088	2.37E-04	0.006606257	-0.51586785
PTPRH	4.05831209	2.38E-04	0.006649676	-0.47432215
6330578E17RIK	4.057017202	2.39E-04	0.006654189	-1.0841631
SLC27A6	4.057077402	2.39E-04	0.006654189	-0.45961395
SUMF1	-4.05602022	2.40E-04	0.006654189	0.29909775
EIF2S1	-4.056357198	2.40E-04	0.006654189	0.38725605
OLFR174	-4.055400928	2.41E-04	0.006656273	0.38516355
LOC100044755	4.053886742	2.42E-04	0.006676132	-0.37397525
TMEM19	4.05281838	2.42E-04	0.006687183	-0.80842525
OLFR847	4.051808451	2.43E-04	0.006697102	-0.30481615
EMG1	4.050200653	2.44E-04	0.006709221	-0.9724127
LOC100041585	-4.050179408	2.44E-04	0.006709221	1.01934005
MLXIPL	4.049197903	2.45E-04	0.006718647	-2.43074885
RPS27L	4.047186123	2.46E-04	0.006720136	-1.4598637
LOC100045040	4.048447188	2.46E-04	0.006720136	-0.51945875
6720456H20RIK	4.047697503	2.46E-04	0.006720136	-0.47373245
CALM5	-4.047092366	2.47E-04	0.006720136	0.7812796
PLEKHF1	4.045821988	2.47E-04	0.006735435	-0.5291339
RHBDD1	4.042336227	2.50E-04	0.006749474	-0.96373195
ERAP1	4.042200929	2.50E-04	0.006749474	-0.4570454
OLFR1032	-4.041600844	2.51E-04	0.006749474	0.32694035
ZFP51	-4.04178814	2.50E-04	0.006749474	0.3637415
AMY2-2	-4.042366307	2.50E-04	0.006749474	0.54485705
PTK9	-4.043558174	2.49E-04	0.006749474	0.75926455
OLFR284	-4.042970182	2.50E-04	0.006749474	0.8502913
GEMIN4	4.040854372	2.51E-04	0.006754421	-0.8118566
METAP1	4.036021111	2.55E-04	0.00681826	-0.97357135
2610101N10RIK	4.034689149	2.56E-04	0.00681826	-0.91701035
LRRC24	4.035152964	2.55E-04	0.00681826	-0.66953215
GLCCI1	-4.034208814	2.56E-04	0.00681826	0.5243319
EPSTI1	-4.036041183	2.55E-04	0.00681826	0.5581987
LOC632431	-4.035665474	2.55E-04	0.00681826	0.67924015
HSD17B14	-4.036909282	2.54E-04	0.00681826	0.8604143
MOBP	-4.033030031	2.57E-04	0.006832139	0.49551575
4921525H12RIK	4.025456935	2.63E-04	0.006977342	-0.49914705
IL22RA2	-4.024850958	2.63E-04	0.006979675	0.45259755
TFB1M	4.0242386	2.64E-04	0.006981803	-0.72925575
NMNAT2	4.023316809	2.65E-04	0.006981803	-0.27980885
CALR4	-4.023272426	2.65E-04	0.006981803	0.36124455
GNB3	-4.021726343	2.66E-04	0.007003718	1.1466907
HS2ST1	4.019497296	2.68E-04	0.007029754	-0.81671845
9830169C18RIK	-4.019602613	2.68E-04	0.007029754	0.94811585
SLC17A4	4.016663064	2.70E-04	0.007078867	-1.22568145
FOLR4	-4.015913338	2.70E-04	0.007084368	0.29463615
OLFR298	-4.013596689	2.72E-04	0.007122929	0.60831535
PPCS	4.012357195	2.73E-04	0.007138856	-0.7482147
GM806	-4.010528143	2.75E-04	0.007167356	0.4298967
PLXNC1	-4.007970817	2.77E-04	0.007211539	0.515151
RNF219	4.007327447	2.77E-04	0.007214932	-0.5722928
ADRA1A	-4.006748557	2.78E-04	0.00721696	0.7284183
AMMECR1L	-4.005526739	2.79E-04	0.007232779	0.56049535
H2-DMB1	4.004093496	2.80E-04	0.007242829	-1.26404255
FUBP3	4.004536482	2.80E-04	0.007242829	-1.0473772
OLFR826	-4.002339981	2.82E-04	0.007270195	0.71021475
PKD1	4.001057445	2.83E-04	0.007277127	-0.96857225
OLFR993	-4.001118637	2.83E-04	0.007277127	0.736159
SPAG7	3.999096399	2.84E-04	0.007298785	-0.8815099
CHRM5	3.999111004	2.84E-04	0.007298785	-0.34148415
KRTAP5-2	-3.997442878	2.86E-04	0.007324251	0.49007045
LMAN1	3.996820324	2.86E-04	0.007327397	-1.52739755
SERPINC1	3.994132795	2.89E-04	0.007375547	-0.5218562
OLFR1403	3.993317702	2.89E-04	0.007382951	-0.35072385
C3AR1	-3.992747286	2.90E-04	0.007385021	0.8488643
ZFP445	-3.991701923	2.91E-04	0.007397506	1.02228165
BC060615	-3.989692971	2.92E-04	0.007431203	0.5701957
TPH1	-3.98817539	2.94E-04	0.007443766	0.38655145
TMEM90A	-3.988499313	2.93E-04	0.007443766	1.300813
ZFX	3.987473529	2.94E-04	0.007448821	-0.686771
PLAA	3.983493563	2.98E-04	0.007474543	-0.90710325
SOX13	3.982526299	2.99E-04	0.007474543	-0.86002045
PACSIN2	3.981477452	3.00E-04	0.007474543	-0.58536825
1200016B10RIK	3.982709153	2.98E-04	0.007474543	-0.52492065
9130401M01RIK	-3.982698807	2.98E-04	0.007474543	0.28519875
MBTPS2	-3.981373898	3.00E-04	0.007474543	0.30406955
CENPE	-3.983294643	2.98E-04	0.007474543	0.320525
OLFR1423	-3.98060002	3.00E-04	0.007474543	0.44345575
V1RC18	-3.984337232	2.97E-04	0.007474543	0.47708495
IDH3G	-3.981487334	3.00E-04	0.007474543	0.5418202
4930444A02RIK	-3.981000581	3.00E-04	0.007474543	0.61741695
NINJ2	-3.983143545	2.98E-04	0.007474543	0.97083125
BC054059	-3.98022232	3.01E-04	0.007474543	1.12423845
MTVR2	3.978667638	3.02E-04	0.00749871	-0.7853383
4933425M15RIK	-3.972950766	3.07E-04	0.007616166	0.41857635
ZFP313	-3.970252866	3.10E-04	0.007656201	0.4693552
INSM1	-3.970332018	3.10E-04	0.007656201	0.80520295
4931406C07RIK	3.969607351	3.10E-04	0.007659175	-1.3400623
ACOT9	3.969198777	3.11E-04	0.007659175	-0.5698245
BC051227	-3.968331371	3.11E-04	0.007668396	0.99208545
VSTM2A	-3.966614622	3.13E-04	0.007696944	0.56074405
OLFR591	-3.965117737	3.14E-04	0.007720588	0.6436803
RPL22	3.963229958	3.16E-04	0.007740513	-1.3909511
ITIH2	3.962871273	3.16E-04	0.007740513	-1.03087465
IL20RA	-3.963366265	3.16E-04	0.007740513	0.52165355
LOC100047800	3.96062259	3.19E-04	0.007781605	-1.03373185
LHCGR	-3.960116017	3.19E-04	0.007782758	0.39499695
0610037L13RIK	3.95857937	3.21E-04	0.00780765	-0.87786285
MTA2	3.956255858	3.23E-04	0.007824401	-0.9065844
C130023O10RIK	-3.956943088	3.22E-04	0.007824401	0.300493
9430077A04RIK	-3.956735897	3.22E-04	0.007824401	0.5646764
KLF13	-3.956036302	3.23E-04	0.007824401	0.7063283
IPO4	3.952067816	3.27E-04	0.007906059	-0.97635325
TMCO7	3.949541011	3.29E-04	0.007922893	-0.7126363
OLFR623	-3.949922876	3.29E-04	0.007922893	0.3707478
ST6GALNAC6	-3.950390961	3.28E-04	0.007922893	0.4154739
ASPSCR1	-3.950013469	3.29E-04	0.007922893	0.5888519
TMEM136	-3.946130316	3.33E-04	0.007992432	1.1797433
LOH12CR1	3.945206811	3.33E-04	0.008003616	-0.6351785
KTELC1	3.943628209	3.35E-04	0.008019715	-0.8023624
CPSF3L	3.943664226	3.35E-04	0.008019715	-0.5582225
FZD6	-3.941679369	3.37E-04	0.008044679	0.8256938
SAA1	-3.941896503	3.37E-04	0.008044679	1.6703931
OLFR95	-3.940992367	3.38E-04	0.008049382	0.54818035
SIX3	-3.940588089	3.38E-04	0.008049382	0.577921
RHOX4D	-3.93371518	3.45E-04	0.008203411	0.66211595
ANAPC4	-3.931411248	3.47E-04	0.008248481	0.590555
TRPC6	-3.930704599	3.48E-04	0.008254848	0.56878205
JAG1	-3.929712413	3.49E-04	0.008261259	0.3297657
DERL1	-3.929553046	3.49E-04	0.008261259	0.4035985
FYB	3.928957612	3.50E-04	0.008264966	-0.8266476
CACNA1C	-3.925898185	3.53E-04	0.008328944	0.44987165
OLFR119	-3.925288562	3.54E-04	0.008333053	0.6835914
CML5	-3.924375261	3.55E-04	0.008344641	0.61248515
ITSN2	3.923746279	3.55E-04	0.00834926	-0.93849715
MRPS34	-3.922279522	3.57E-04	0.008374537	0.5176666
AA673488	3.919734488	3.59E-04	0.008413018	-0.7150633
TCF19	3.919374228	3.60E-04	0.008413018	-0.49229945
BCAN	-3.919785745	3.59E-04	0.008413018	0.4366484
TDRD1	-3.918965955	3.60E-04	0.008413018	0.67917725
D18ERTD653E	-3.916807025	3.63E-04	0.00845576	0.74
BC052055	-3.915839687	3.64E-04	0.008468962	0.37834605
D12ERTD553E	3.912523612	3.67E-04	0.008527768	-1.0628231
LOC100045280	-3.912036211	3.68E-04	0.008527768	0.32174485
EG70793	-3.911744429	3.68E-04	0.008527768	0.58168645
LOC100048056	-3.912436916	3.67E-04	0.008527768	0.66147195
CRKRS	-3.907324032	3.73E-04	0.008628365	0.78541835
ADCY1	3.904661358	3.76E-04	0.008651957	-0.4873262
GLIS2	-3.904839048	3.76E-04	0.008651957	0.39339415
API5	-3.905802057	3.74E-04	0.008651957	0.61884305
FFAR1	-3.905028038	3.75E-04	0.008651957	0.73521535
PCYT1B	-3.902496681	3.78E-04	0.00869615	0.57695475
OLFR97	-3.901360806	3.79E-04	0.008703128	0.45986535
MRGPRG	-3.901365924	3.79E-04	0.008703128	0.7908546
CCT8	3.899713033	3.81E-04	0.008732391	-0.9202958
FBF1	-3.899358076	3.82E-04	0.008732391	1.1240199
GOLGA1	3.89785391	3.83E-04	0.00875107	-1.14370925
MTMR12	3.897772264	3.83E-04	0.00875107	-0.6278707
ZFP455	3.896258858	3.85E-04	0.008779015	-0.5535054
1810009O10RIK	3.895143639	3.86E-04	0.008796758	-0.801586
TROVE2	3.893947132	3.88E-04	0.008816654	-0.77289515
AY053573	-3.889887279	3.92E-04	0.008911256	0.94772875
OLFR1058	-3.887470453	3.95E-04	0.008963496	0.4383375
CRB1	-3.885710555	3.97E-04	0.008987418	0.61851785
4930432K21RIK	-3.885818545	3.97E-04	0.008987418	1.0468814
OLFR1394	3.884839923	3.98E-04	0.008999176	-0.75516655
NXPH3	-3.883512692	4.00E-04	0.009023049	0.50109135
TMEM38B	3.881833843	4.02E-04	0.009056339	-0.50566355
LOC672215	3.879877161	4.04E-04	0.009097176	-0.28698735
XPC	3.877616842	4.07E-04	0.009146347	-0.92499125
3110082I17RIK	3.875392225	4.09E-04	0.009194824	-0.6204771
STEAP2	3.8741909	4.11E-04	0.009195504	-0.6818706
OLFR521	-3.874509784	4.11E-04	0.009195504	0.56853315
OLFR724	-3.8741007	4.11E-04	0.009195504	0.758348
SEC10L1	-3.872641174	4.13E-04	0.009212185	0.66940305
RUNX1T1	-3.872722724	4.13E-04	0.009212185	0.8144741
CCDC23	3.871587768	4.14E-04	0.00921796	-0.9601793
TBC1D2B	3.871720223	4.14E-04	0.00921796	-0.5312417
5830411N06RIK	3.870303887	4.16E-04	0.009230029	-0.4309475
9130019O22RIK	3.870613873	4.15E-04	0.009230029	-0.29443235
ZFP655	3.865911531	4.21E-04	0.009337246	-1.02659415
SULT4A1	3.865415713	4.22E-04	0.009337246	-0.5808908
PSMC5	-3.86469502	4.23E-04	0.009337246	0.4528952
D1PAS1	-3.865019837	4.22E-04	0.009337246	1.24128215
TSX	-3.862023179	4.26E-04	0.009399177	0.4762951
JOSD1	3.859829786	4.29E-04	0.009413862	-0.51878265
FYTTD1	3.86083277	4.27E-04	0.009413862	-0.3934208
ADAM22	3.860056288	4.28E-04	0.009413862	-0.3528506
MCM3AP	-3.860069622	4.28E-04	0.009413862	0.66325065
ALX1	-3.855625509	4.34E-04	0.009518972	0.7557298
METTL4	-3.853307443	4.37E-04	0.009565746	0.6447682
FOXJ1	-3.85312504	4.37E-04	0.009565746	0.9468479
KREMEN	3.851104469	4.40E-04	0.009599293	-0.7827549
SFXN5	3.851198874	4.40E-04	0.009599293	-0.64663445
NR2E1	-3.850594083	4.40E-04	0.009602065	0.8864181
OLFR536	-3.847960207	4.44E-04	0.009653125	0.4172331
TBL3	-3.848106056	4.44E-04	0.009653125	0.5465806
OLFR1216	-3.846582664	4.46E-04	0.009680488	0.39052315
ZFP189	3.845711688	4.47E-04	0.009681949	-0.5183429
ACVR2B	-3.84577792	4.47E-04	0.009681949	0.6887795
OLFR262	3.845153822	4.47E-04	0.009686168	-0.3315113
APON	3.843934924	4.49E-04	0.009706806	-1.42620595
1810043G02RIK	3.843609796	4.49E-04	0.009706806	-0.6538331
BC013712	3.841992737	4.52E-04	0.009729617	-0.714108
GPR65	-3.842245829	4.51E-04	0.009729617	0.50803025
LMTK2	3.841374195	4.52E-04	0.009735648	-0.64757845
KCMF1	3.839078458	4.55E-04	0.009789604	-0.84492345
9030624J02RIK	3.838155318	4.57E-04	0.009804425	-0.97854645
IFNZ	-3.836654419	4.59E-04	0.009835884	0.7092118
NAIP5	3.835142835	4.61E-04	0.009867761	-0.58028535
WIPF2	-3.832772134	4.64E-04	0.009924642	0.72206525
BCLP2	-3.830749922	4.67E-04	0.009971689	0.73888085
6530418L21RIK	-3.829571043	4.68E-04	0.009994303	0.58661775
OLFR504	-3.828967814	4.69E-04	0.010000143	0.46857185
TMEM45A	-3.823850529	4.76E-04	0.010138825	0.3361295
PON3	3.82264635	4.78E-04	0.010162589	-0.6601082
NAT13	-3.819663271	4.82E-04	0.010239468	0.86913225
AOX4	-3.818749717	4.83E-04	0.010254778	0.71752585
TMEM55A	3.818017064	4.84E-04	0.010264702	-0.63220545
GSTP2	3.815483556	4.88E-04	0.01030681	-0.9449729
UFSP1	3.815413155	4.88E-04	0.01030681	-0.7744892
MBL2	3.815777029	4.88E-04	0.01030681	-0.72910075
MRPL22	3.813440884	4.91E-04	0.010307679	-1.039205
RUFY1	3.814303197	4.90E-04	0.010307679	-0.9712544
5730589K01RIK	3.814219545	4.90E-04	0.010307679	-0.85273365
MPP3	-3.813081219	4.91E-04	0.010307679	0.4097951
UXT	-3.814059611	4.90E-04	0.010307679	0.43561305
OLFR213	-3.812993534	4.92E-04	0.010307679	0.71204825
EAF2	-3.806422205	5.01E-04	0.010495012	0.5378066
OLFR108	-3.805521686	5.02E-04	0.010510443	0.57911425
AU021092	3.803698239	5.05E-04	0.010512198	-0.5467332
CFHR1	3.80391633	5.05E-04	0.010512198	-0.37400725
NUP35	-3.804915031	5.03E-04	0.010512198	0.44015025
EG381818	-3.803093611	5.06E-04	0.010512198	0.4407118
STXBP6	-3.803383329	5.05E-04	0.010512198	0.502685
OLFR1336	-3.80315647	5.06E-04	0.010512198	0.69728265
2010003J03RIK	3.799046814	5.12E-04	0.010624731	-0.6439074
EG218444	-3.798273171	5.13E-04	0.010636514	0.29184365
PHACTR4	3.797852186	5.14E-04	0.010637385	-0.4571339
TMEM63A	-3.794761539	5.18E-04	0.010717348	0.50128945
CCNJ	-3.794497194	5.19E-04	0.010717348	1.05454365
GTF2A2	3.791694092	5.23E-04	0.010792887	-0.6214368
SRFBP1	3.789546191	5.26E-04	0.010840882	-0.7328557
MGC107702	-3.788997636	5.27E-04	0.010840882	0.4155194
SCYL2	-3.789323284	5.27E-04	0.010840882	0.97564035
AB041550	3.786240362	5.31E-04	0.010915847	-0.314076
LOC677144	3.784740581	5.34E-04	0.010951173	-0.899098
FUT11	-3.783011353	5.36E-04	0.010981521	0.24326995
CCDC66	-3.783296351	5.36E-04	0.010981521	0.5220252
OLFR1076	3.782426349	5.37E-04	0.010987801	-0.2902148
LRRIQ2	3.779525206	5.42E-04	0.011068432	-0.5504343
NOB1	3.776897986	5.46E-04	0.011092252	-0.48311525
CDH20	-3.778128169	5.44E-04	0.011092252	0.32260555
LOC100047300	-3.777184253	5.46E-04	0.011092252	0.37140325
EG545929	-3.776851398	5.46E-04	0.011092252	0.4093386
D7BWG0611E	-3.777373359	5.45E-04	0.011092252	1.1449036
GPR137B	-3.774783536	5.49E-04	0.011146645	0.66588315
RHBDF2	-3.773654262	5.51E-04	0.011170782	1.13404515
PSMD2	-3.773149543	5.52E-04	0.011174673	0.66591425
OLFR1250	-3.771715519	5.54E-04	0.011208818	0.52374625
PGCP	3.771047256	5.55E-04	0.011218079	-0.8319897
5830443L24RIK	-3.769535644	5.58E-04	0.011254914	0.6236723
XRCC2	3.766908001	5.62E-04	0.011328555	-0.53791
AFF1	3.763892866	5.67E-04	0.011403324	-0.55194385
4931408C20RIK	-3.763877928	5.67E-04	0.011403324	0.5914433
GRIN2A	-3.763335122	5.68E-04	0.011408642	0.5048652
THAP4	3.759850402	5.74E-04	0.011511911	-0.88985635
APCS	3.759462226	5.74E-04	0.011512131	-1.05097805
RBKS	3.758598438	5.76E-04	0.011528273	-1.03760035
ST8SIA1	-3.75736762	5.78E-04	0.011556757	0.2287494
NLRP3	-3.756874769	5.79E-04	0.01156053	0.42448185
CTNND1	-3.755494533	5.81E-04	0.011581373	0.30812265
OLFR466	-3.755808734	5.81E-04	0.011581373	0.5899296
NUP160	3.753108823	5.85E-04	0.011585285	-0.76474355
OLFR904	-3.7532061	5.85E-04	0.011585285	0.21232455
P2RY10	-3.753771786	5.84E-04	0.011585285	0.2904646
LOC100044599	-3.753294333	5.85E-04	0.011585285	0.29492345
RHOBTB2	-3.754261746	5.83E-04	0.011585285	0.48558965
NPAS4	-3.753853809	5.84E-04	0.011585285	0.54638255
2410016F19RIK	-3.749552848	5.91E-04	0.011689127	0.46705295
CPSF6	-3.749279892	5.92E-04	0.011689127	0.6665509
MEIS3	-3.747725292	5.94E-04	0.011729151	0.3261663
TESSP2	-3.747038513	5.95E-04	0.011739735	0.84760945
LOC100044776	3.746430966	5.97E-04	0.011740267	-0.8201184
XRCC6BP1	-3.746272487	5.97E-04	0.011740267	0.50328865
HPCAL1	-3.745863147	5.98E-04	0.01174145	0.87285895
BACE1	3.745330076	5.98E-04	0.011743742	-1.26153955
PITX1	3.745046556	5.99E-04	0.011743742	-0.4161864
EG237300	-3.74467433	6.00E-04	0.011743742	0.3422605
HIST2H2AB	3.740339581	6.07E-04	0.011869127	-0.8508594
EG545047	-3.740265086	6.07E-04	0.011869127	0.81739815
HSP90B1	3.739169081	6.09E-04	0.01188714	-0.75674055
PHACTR3	-3.738997419	6.10E-04	0.01188714	0.3794651
BTBD1	3.738108785	6.11E-04	0.011891728	-1.05201695
GM1019	3.738486944	6.10E-04	0.011891728	-0.5298872
D17H6S56E-5	-3.737750466	6.12E-04	0.011891728	0.6239425
RBM4	3.735348053	6.16E-04	0.011949122	-0.63923225
C87436	3.735376093	6.16E-04	0.011949122	-0.56356545
TRHDE	-3.734964864	6.17E-04	0.011949586	0.7242743
MRGPRA2	-3.734236199	6.18E-04	0.011951316	0.6847101
B630005N14RIK	-3.734176467	6.18E-04	0.011951316	0.769867
6230416J20RIK	3.733660705	6.19E-04	0.01195641	-0.5114346
NDUFA5	3.732731309	6.21E-04	0.011975858	-0.64454625
MRPL52	3.731550587	6.23E-04	0.011981904	-1.1286144
ISG20L2	3.731392448	6.23E-04	0.011981904	-1.0543215
9130221H12RIK	3.730721294	6.24E-04	0.011981904	-1.0334155
MAGEA5	-3.730852096	6.24E-04	0.011981904	0.2612474
DLX5	-3.731608376	6.23E-04	0.011981904	0.4144115
ANKRD16	3.729905988	6.26E-04	0.011997502	-0.4781253
CSK	3.727776767	6.30E-04	0.012058916	-0.59609995
MTMR7	-3.725835726	6.33E-04	0.012091384	0.36289945
4930473A06RIK	-3.726407668	6.32E-04	0.012091384	0.6121258
4930403C10RIK	-3.725752878	6.33E-04	0.012091384	0.8765739
NAALAD2	-3.724123138	6.36E-04	0.012135748	0.6144072
PDE7A	-3.723662184	6.37E-04	0.012139156	0.6070676
IKBKAP	3.723056039	6.38E-04	0.01214768	-0.9406265
HISPPD1	-3.722377149	6.40E-04	0.01215878	0.5246501
0610010E21RIK	3.721310857	6.42E-04	0.01217611	-1.069161
SETD5	3.720598648	6.43E-04	0.01217611	-0.9080355
RASSF8	-3.720296009	6.43E-04	0.01217611	0.2375181
4930428E23RIK	-3.72014643	6.44E-04	0.01217611	0.26206325
DAXX	-3.720074223	6.44E-04	0.01217611	0.44813645
PXN	-3.718706322	6.46E-04	0.012211623	0.4649043
V1RB3	-3.718009594	6.48E-04	0.012219481	0.56659765
NR4A1	-3.717762853	6.48E-04	0.012219481	0.8630883
COL25A1	-3.717329804	6.49E-04	0.012222063	0.2259907
A730036I17RIK	3.71489704	6.54E-04	0.012295551	-0.5175142
SIGLEC5	-3.713595467	6.56E-04	0.012316301	0.3215694
CPNE1	-3.713709239	6.56E-04	0.012316301	0.7276915
CSTF2	3.71262866	6.58E-04	0.012337973	-1.16555125
SMGC	3.710245975	6.62E-04	0.012410375	-0.2140696
SLU7	-3.708002023	6.67E-04	0.012478193	0.5594577
KIRREL	-3.707262682	6.68E-04	0.012479358	0.3662962
TMEM130	-3.707254616	6.68E-04	0.012479358	0.668505
TPP2	3.705518325	6.72E-04	0.012529182	-0.72710325
TSPAN14	3.703960327	6.75E-04	0.012562082	-0.8419218
FEM1B	3.703897343	6.75E-04	0.012562082	-0.69258305
DCDC2A	-3.703366177	6.76E-04	0.012568438	0.8332508
CCBE1	-3.701972706	6.78E-04	0.012606162	0.44876755
ENAM	3.700007461	6.82E-04	0.01264303	-0.19943685
GULP1	-3.700058154	6.82E-04	0.01264303	0.3537174
MEX3A	-3.699541859	6.83E-04	0.01264303	0.493874
SPRR4	-3.699615083	6.83E-04	0.01264303	0.67275
TMEM128	3.698283022	6.86E-04	0.012676098	-0.9901373
EGFLAM	-3.697641446	6.87E-04	0.012686637	0.48605185
TIMM10	3.695315441	6.92E-04	0.012703293	-0.929468
ZC3H7A	3.696712562	6.89E-04	0.012703293	-0.88978575
CYP2S1	3.69507197	6.92E-04	0.012703293	-0.72884175
1500001M20RIK	3.695322945	6.92E-04	0.012703293	-0.5644656
TSN	3.695319546	6.92E-04	0.012703293	-0.3320351
OLFR206	-3.69628033	6.90E-04	0.012703293	0.524397
E130014J05RIK	3.692948337	6.96E-04	0.012768423	-0.8008751
OLFR986	-3.692110809	6.98E-04	0.012773429	0.2530045
HEYL	-3.692403338	6.97E-04	0.012773429	0.45354375
P2RY6	3.691002004	7.00E-04	0.012801409	-0.95879005
SPG7	3.689489498	7.03E-04	0.012844404	-0.4610319
ESRRG	-3.687570273	7.07E-04	0.012902673	0.78951435
NCKAP1	3.684208247	7.14E-04	0.01295695	-0.8519784
PDIA5	3.682374933	7.18E-04	0.01295695	-0.560866
ZDHHC9	-3.68262499	7.17E-04	0.01295695	0.4519894
ZMYM5	-3.684317334	7.14E-04	0.01295695	0.50378155
EG245376	-3.684269986	7.14E-04	0.01295695	0.5324194
EG432743	-3.682677356	7.17E-04	0.01295695	0.64085035
OLFR979	-3.684610514	7.13E-04	0.01295695	0.66153685
EG436332	-3.682288917	7.18E-04	0.01295695	0.69189235
FBXO2	-3.684772073	7.13E-04	0.01295695	0.7266824
LOC235206	-3.68364798	7.15E-04	0.01295695	0.7394994
SRISNF2L	-3.683974774	7.15E-04	0.01295695	0.7981534
PHKA1	-3.680732038	7.21E-04	0.013002252	0.44296195
IKZF1	-3.678057969	7.27E-04	0.013080162	0.37978475
2810046M22RIK	-3.67796791	7.27E-04	0.013080162	0.66663495
RDH10	-3.675256072	7.33E-04	0.013169646	1.03458015
ZFP668	-3.673680014	7.36E-04	0.013203333	0.3689813
OSCAR	-3.673797496	7.36E-04	0.013203333	0.8060026
OTX2	-3.672749476	7.38E-04	0.013225651	0.413443
V1RB9	-3.672400855	7.39E-04	0.013225839	0.80607855
GTF3C1	3.671637358	7.40E-04	0.013241847	-0.5891434
MPP4	3.671119674	7.42E-04	0.013247596	-1.0700443
BRD4	3.6708008	7.42E-04	0.013247596	-0.45270375
DISP1	3.668851883	7.46E-04	0.013282826	-0.74141985
PEX19	-3.669045827	7.46E-04	0.013282826	0.54362215
UBTD1	-3.669364811	7.45E-04	0.013282826	0.8489676
V1RC28	-3.665685941	7.53E-04	0.013391231	0.57795195
CDKN1B	-3.664632839	7.56E-04	0.013410337	0.1856641
MRPL15	-3.66441117	7.56E-04	0.013410337	0.45767805
OLFR522	-3.663926359	7.57E-04	0.013410337	0.46265555
2610529C04RIK	-3.663487389	7.58E-04	0.013410337	0.8935903
LOC665103	-3.663734315	7.57E-04	0.013410337	0.9708695
2810007J24RIK	3.662170209	7.61E-04	0.013429991	-1.17381265
STAP1	3.660861156	7.64E-04	0.013429991	-0.4287837
YTHDF2	3.660269925	7.65E-04	0.013429991	-0.353055
G6PC2	-3.661817585	7.62E-04	0.013429991	0.3544906
5430432M24RIK	-3.660377811	7.65E-04	0.013429991	0.47461665
GSK3B	-3.662079492	7.61E-04	0.013429991	0.47502775
OLFR267	-3.661270095	7.63E-04	0.013429991	0.5815068
DNASE1L2	-3.660544991	7.64E-04	0.013429991	0.7479207
SLC22A2	-3.659872766	7.66E-04	0.01343231	0.8836077
FGF4	-3.659435613	7.67E-04	0.013436187	0.7835089
ATP4B	-3.657125476	7.72E-04	0.013512647	0.5372997
HSD17B12	3.656229161	7.74E-04	0.013521357	-1.10115315
IVL	-3.656515143	7.73E-04	0.013521357	0.69824255
PCDHGA6	-3.653797152	7.79E-04	0.013603075	0.2036808
SH3YL1	3.652680331	7.82E-04	0.013607437	-1.0745708
RAB30	-3.653049572	7.81E-04	0.013607437	0.66199495
V1RC32	-3.652715265	7.82E-04	0.013607437	0.8595235
OLFR52	-3.649932209	7.88E-04	0.013681858	0.36817545
BAT2	-3.649779472	7.88E-04	0.013681858	0.7280486
PPM2C	-3.649955005	7.88E-04	0.013681858	0.9115287
LY75	-3.647759784	7.93E-04	0.013748281	0.49004435
BC031853	3.647183646	7.94E-04	0.013757871	-1.18384985
GPR135	3.646646849	7.96E-04	0.013765924	-0.5487029
LCE1M	-3.644459475	8.01E-04	0.01383943	0.7433817
OLFR159	-3.643803855	8.02E-04	0.013852275	0.6961738
OLFR653	-3.642298227	8.06E-04	0.013877706	0.28781315
CFL2	-3.642787705	8.04E-04	0.013877706	0.4622365
RHBDD2	-3.642169196	8.06E-04	0.013877706	0.6482572
GPR114	3.641491151	8.07E-04	0.013878332	-0.6919605
SHROOM3	3.641686907	8.07E-04	0.013878332	-0.58687135
CD207	3.640409112	8.10E-04	0.013908292	-0.4665646
OLFR1222	-3.63952864	8.12E-04	0.013930263	0.2814724
TOE1	3.63886914	8.14E-04	0.013943435	-0.70510085
GPR75	3.63654508	8.19E-04	0.014011127	-0.3773689
TRIM32	3.636462658	8.19E-04	0.014011127	-0.33829225
GNAT1	-3.636192448	8.20E-04	0.014011127	0.84100245
MAGOH	3.63561035	8.21E-04	0.014021303	-0.6822294
CPNE2	3.633689563	8.26E-04	0.014085477	-1.00130675
ANXA10	-3.632637215	8.28E-04	0.014114748	0.8533274
FKTN	3.629709646	8.35E-04	0.014220338	-0.74339285
KCNJ9	-3.628456663	8.38E-04	0.014258094	0.5711668
BCL7A	3.627719745	8.40E-04	0.014274827	-1.1918644
PPP2R5B	3.626911138	8.42E-04	0.014294526	-0.5896872
GAB1	3.622586457	8.52E-04	0.014384927	-0.8765973
CCDC90B	3.622426776	8.53E-04	0.014384927	-0.74781195
CCDC51	3.622721988	8.52E-04	0.014384927	-0.59057455
OLFR1307	-3.623640677	8.50E-04	0.014384927	0.419945
MOS	-3.622680931	8.52E-04	0.014384927	0.44785865
GNAI3	-3.624069796	8.49E-04	0.014384927	0.4486377
OLFR2	-3.623681381	8.50E-04	0.014384927	0.59614865
A830007P12RIK	3.621638898	8.55E-04	0.014404005	-0.85479085
HIP2	3.619262362	8.61E-04	0.014438027	-0.9164538
EFHA1	3.618223926	8.63E-04	0.014438027	-0.64036485
GM249	-3.619381943	8.60E-04	0.014438027	0.33540115
LOC434172	-3.618570413	8.62E-04	0.014438027	0.4342747
A930021C24RIK	-3.618384562	8.63E-04	0.014438027	0.545036
OLFR330	-3.619798236	8.59E-04	0.014438027	0.6103234
AF067063	-3.619598723	8.60E-04	0.014438027	0.6468599
GTF3C6	-3.618925833	8.61E-04	0.014438027	0.76301655
GPR107	3.615587857	8.70E-04	0.014499323	-0.92305055
IER5L	3.616275425	8.68E-04	0.014499323	-0.92234785
IL23R	-3.615455347	8.70E-04	0.014499323	0.2336448
CTSJ	-3.615563162	8.70E-04	0.014499323	0.56952865
6430411K18RIK	-3.61443922	8.73E-04	0.01452818	0.63985065
SPP1	3.614073635	8.74E-04	0.014530023	-1.00969945
CENPL	3.612845368	8.77E-04	0.014558049	-0.90629935
LOC622408	-3.612758657	8.77E-04	0.014558049	0.50146555
CHRNE	-3.612362987	8.78E-04	0.014561184	0.98034725
HYDIN	3.612002017	8.79E-04	0.014562885	-0.42496325
LOC100045981	3.610453107	8.83E-04	0.014577485	-0.75155035
UROS	3.610373977	8.83E-04	0.014577485	-0.6652242
TMPRSS11C	3.610383433	8.83E-04	0.014577485	-0.46024565
MCM2	-3.610664175	8.82E-04	0.014577485	0.80875155
PROM1	-3.609387163	8.85E-04	0.014605373	0.8506183
TCF7L2	3.608630913	8.87E-04	0.014623674	-0.83768295
LOC100046861	-3.608198531	8.88E-04	0.01462845	0.8288375
TCFEB	-3.607648273	8.90E-04	0.014638173	0.4858719
MINPP1	-3.606267174	8.93E-04	0.014682761	0.4702612
SEMA3C	-3.605092431	8.96E-04	0.014718801	0.34183605
DDX58	-3.604504512	8.98E-04	0.014723443	0.65380845
EG434171	-3.604348018	8.98E-04	0.014723443	0.7813603
ADAMTS20	3.603418098	9.01E-04	0.014749282	-0.4151296
PSMA1	-3.602513957	9.03E-04	0.014774086	0.56482595
IGTP	3.601533379	9.05E-04	0.014787976	-1.0918488
PRDM9	3.600628029	9.08E-04	0.014787976	-0.6043887
GM97	-3.600761593	9.07E-04	0.014787976	0.3362175
FUSIP1	-3.600946923	9.07E-04	0.014787976	0.47651535
FBXW12	-3.600607242	9.08E-04	0.014787976	0.6275416
GM784	-3.600179436	9.09E-04	0.014792754	0.30498395
PBX3	-3.599592303	9.10E-04	0.014804284	0.4653185
TRAM1	3.598582023	9.13E-04	0.014820456	-0.8321375
OLFR1306	-3.598861539	9.12E-04	0.014820456	0.3192612
APOC2	-3.596268095	9.19E-04	0.014905397	0.440655
SLC25A35	3.595040535	9.22E-04	0.014909275	-0.6916241
SLC30A5	3.595340361	9.22E-04	0.014909275	-0.64004055
SELL	3.595357454	9.22E-04	0.014909275	-0.5765303
KRTAP15	3.59487431	9.23E-04	0.014909275	-0.4088953
NFASC	-3.594612135	9.23E-04	0.014909275	0.284019
CEACAM2	-3.592570883	9.29E-04	0.014983084	0.87713305
CSPP1	3.591653555	9.31E-04	0.01498331	-0.87567245
FOXN3	3.591782282	9.31E-04	0.01498331	-0.4025903
CCDC93	-3.591630525	9.31E-04	0.01498331	0.3361433
9030625A04RIK	3.590543011	9.34E-04	0.014991589	-0.81664275
GPR45	3.590696299	9.34E-04	0.014991589	-0.50518725
SLITRK3	-3.590504394	9.34E-04	0.014991589	0.7088278
NR2C2AP	3.589000953	9.38E-04	0.015029426	-0.8942762
IL3	-3.589299686	9.38E-04	0.015029426	0.62020375
EDEM1	3.588016225	9.41E-04	0.015058406	-0.3212272
WDR55	3.587497678	9.42E-04	0.015067389	-0.63402545
SESN3	3.586466749	9.45E-04	0.01509845	-0.2851155
CMKLR1	-3.58576203	9.47E-04	0.015102188	0.31997215
GM826	-3.585762007	9.47E-04	0.015102188	0.66920455
DMRT1	3.58503754	9.49E-04	0.015114168	-0.3935482
LOC100048071	-3.58471955	9.50E-04	0.015114168	0.39156045
LMX1A	-3.584559066	9.50E-04	0.015114168	0.46872715
OLFR1314	3.582105039	9.57E-04	0.015206995	-0.3056058
KLF15	3.58138587	9.59E-04	0.015213714	-0.65977685
LYRM2	-3.581310826	9.59E-04	0.015213714	0.44075605
2610318N02RIK	-3.581028	9.60E-04	0.015213714	0.902067
OTTMUSG00000015643	3.580275313	9.62E-04	0.015233071	-0.4891571
EDG8	3.57731691	9.70E-04	0.015348695	-0.554805
ID2	3.575427567	9.75E-04	0.015409534	-0.8709694
FGB	3.57501056	9.77E-04	0.015409534	-0.2399527
D130040H23RIK	-3.575219027	9.76E-04	0.015409534	0.2384277
LANCL3	-3.574441447	9.78E-04	0.015421107	0.59501275
USP7	3.573471978	9.81E-04	0.015442853	-1.01144695
CLEC4A3	3.573031302	9.82E-04	0.015442853	-0.47001155
TTC8	-3.573073323	9.82E-04	0.015442853	0.5846636
2610034E13RIK	-3.572384598	9.84E-04	0.01545791	0.8090224
CCDC49	-3.571776087	9.86E-04	0.015471307	0.79284265
COG6	3.568279758	9.96E-04	0.015608317	-0.73727195
ZIK1	-3.568072939	9.96E-04	0.015608317	0.50365445
E530011F12RIK	-3.567609345	9.97E-04	0.01561542	0.7490118
FPR2	3.567199804	9.99E-04	0.015620133	-1.1052735
MAP1LC3B	3.566485454	1.00E-03	0.015624934	-1.06486065
ELOVL5	3.566666215	1.00E-03	0.015624934	-0.53082875
GABRQ	-3.566013724	1.00E-03	0.01563245	0.8278589
4933402N03RIK	-3.563760676	1.01E-03	0.015719507	0.2968053
DAZAP2	3.562841814	1.01E-03	0.015720061	-1.08533585
CABLES2	3.563099347	1.01E-03	0.015720061	-0.64635425
S100A7A	-3.562979253	1.01E-03	0.015720061	0.3117314
SLC25A33	3.561542785	1.01E-03	0.015724261	-0.9941499
YWHAB	3.562437105	1.01E-03	0.015724261	-0.6401929
EPHA4	-3.561667869	1.01E-03	0.015724261	0.6988426
HS1BP3	-3.561904171	1.01E-03	0.015724261	0.77195115
KLHDC4	-3.561241608	1.02E-03	0.015724284	0.5357799
ALOX8	3.560462706	1.02E-03	0.015745711	-0.30744135
COL9A1	-3.560059992	1.02E-03	0.015750306	0.2786307
OLFR1337	3.557209624	1.03E-03	0.015830596	-0.5800781
SMCHD1	3.556476749	1.03E-03	0.015830596	-0.33246985
CRYGB	-3.55682363	1.03E-03	0.015830596	0.4742614
D930040M24RIK	-3.556836241	1.03E-03	0.015830596	0.7050891
OTTMUSG00000000494	-3.556561389	1.03E-03	0.015830596	0.75260625
BCL9	-3.557918713	1.03E-03	0.015830596	1.48022195
DSTN	3.554189422	1.04E-03	0.01590908	-1.03362615
GALNT2	3.554141188	1.04E-03	0.01590908	-0.53192195
TUBGCP4	3.552079657	1.04E-03	0.015989058	-0.33443245
8430432M10RIK	-3.551359798	1.04E-03	0.016008251	0.62414995
CHEK1	-3.551054946	1.05E-03	0.016008577	0.41231525
IL17F	-3.550102559	1.05E-03	0.016038411	0.64568815
LIPE	-3.548559108	1.05E-03	0.016095327	0.7408872
RABGAP1L	-3.547744826	1.06E-03	0.016119006	0.5317194
ADPRHL1	-3.547435667	1.06E-03	0.016119572	0.5424349
TSEN34	3.54655108	1.06E-03	0.016146531	-0.75292235
2810008M24RIK	3.544775727	1.06E-03	0.016214528	-0.7089515
IFI47	3.543745323	1.07E-03	0.016246957	-0.8065223
1810026J23RIK	3.543223247	1.07E-03	0.016246957	-0.629063
AMAC1	3.543184647	1.07E-03	0.016246957	-0.6256464
CHCHD4	3.542312747	1.07E-03	0.016273581	-0.7307586
PNPO	-3.540265158	1.08E-03	0.016354772	0.5929836
CHRNB4	3.539399102	1.08E-03	0.016381311	-0.44789595
TAS2R121	-3.537520009	1.09E-03	0.016452228	0.2911607
V1RH5	-3.537288095	1.09E-03	0.016452228	0.7601135
TCSTV1	-3.536127609	1.09E-03	0.016492725	0.7412133
MRPS6	3.53539124	1.09E-03	0.016513436	-0.79069585
ITGA2B	-3.53502065	1.09E-03	0.016517027	0.7654613
IDH2	3.534356248	1.10E-03	0.016520643	-1.0366381
8030462N17RIK	-3.534630759	1.10E-03	0.016520643	0.30748655
TADA1L	3.533482893	1.10E-03	0.016547859	-0.7542192
USP27X	-3.532382455	1.10E-03	0.016585811	0.37920065
ARRDC3	3.531600631	1.10E-03	0.016608836	-1.6565985
TRMU	3.531020857	1.11E-03	0.016622371	-0.6214994
RGL3	3.530379942	1.11E-03	0.016638811	-0.5404888
SLC1A6	-3.528563093	1.11E-03	0.01671092	0.9724559
PIM2	-3.527808135	1.12E-03	0.016732874	0.2229469
TXN1	3.526896233	1.12E-03	0.016762323	-0.41124445
ROR1	3.525540769	1.12E-03	0.016799079	-0.36267785
ZFP28	-3.525802471	1.12E-03	0.016799079	0.6097166
CLRN3	-3.52513307	1.13E-03	0.016804631	0.42632545
2810485I05RIK	3.524009993	1.13E-03	0.01683183	-1.20436185
BEST3	-3.523980953	1.13E-03	0.01683183	0.24189035
RPL6	-3.523680514	1.13E-03	0.016832305	0.679585
IHPK2	3.522796839	1.13E-03	0.016846787	-0.8724424
CSRP2BP	3.522957941	1.13E-03	0.016846787	-0.7197355
MYC	-3.522080598	1.14E-03	0.01686716	0.58412535
PGAM5	3.521748388	1.14E-03	0.016869198	-0.57549905
SH3PXD2A	3.51842851	1.15E-03	0.016982849	-0.50668655
H2-M10.1	3.518222364	1.15E-03	0.016982849	-0.3464518
SSTR5	-3.518343435	1.15E-03	0.016982849	0.3909428
DBNDD1	-3.518382466	1.15E-03	0.016982849	0.5468948
PGLYRP4	3.517442213	1.15E-03	0.017006516	-0.3460496
HIST1H3E	3.516493496	1.15E-03	0.017022168	-0.6189348
SOD1	3.516556166	1.15E-03	0.017022168	-0.5264797
EG547347	-3.516253156	1.15E-03	0.017022168	0.89739685
ATP8B1	3.515730818	1.16E-03	0.017030237	-1.11306735
ZFP91	-3.51551074	1.16E-03	0.017030237	0.62912765
CEPT1	3.514498124	1.16E-03	0.017065256	-0.49565755
TTC30A1	-3.511437407	1.17E-03	0.017199793	0.31206735
ENTPD7	3.510061153	1.17E-03	0.017246494	-0.51944425
LOC626854	-3.50990589	1.17E-03	0.017246494	0.27676585
SULT5A1	-3.509116798	1.18E-03	0.017271045	0.96879785
RNF215	3.506870132	1.19E-03	0.017367115	-0.7121208
USMG5	3.506218384	1.19E-03	0.017378663	-0.56612
RAB27B	-3.506063233	1.19E-03	0.017378663	0.4395754
TFB2M	3.505094494	1.19E-03	0.017384192	-0.48735375
LOC100042179	3.505499638	1.19E-03	0.017384192	-0.4750053
OLFR531	-3.505364853	1.19E-03	0.017384192	0.55168055
ABCC6	-3.504248306	1.19E-03	0.017411809	0.5084617
C1RL	3.501259339	1.20E-03	0.017489144	-0.5111139
KRTAP8-2	3.501509231	1.20E-03	0.017489144	-0.4747129
EIF2B4	-3.501577018	1.20E-03	0.017489144	0.52212195
RFXDC2	-3.502379208	1.20E-03	0.017489144	0.69823825
B4GALNT3	-3.501447635	1.20E-03	0.017489144	0.76049815
MAPK7	-3.499997531	1.21E-03	0.017537573	0.60737915
RPS3A	3.498205732	1.21E-03	0.017570266	-1.00720415
RAB24	3.498628913	1.21E-03	0.017570266	-0.55582325
OLFR960	-3.498485469	1.21E-03	0.017570266	0.4183175
WWP2	-3.498634269	1.21E-03	0.017570266	0.4222381
KLRE1	-3.497473252	1.22E-03	0.017592616	0.3431403
MGAT4B	3.495885367	1.22E-03	0.017615458	-0.67911035
RNASE13	-3.49671646	1.22E-03	0.017615458	0.4177141
1700019E19RIK	-3.496101621	1.22E-03	0.017615458	0.42847775
CYP26B1	-3.495925063	1.22E-03	0.017615458	0.60726465
ALDH8A1	-3.493142715	1.23E-03	0.017738365	0.27611485
GDNF	-3.492386205	1.23E-03	0.017762181	0.6463098
TSPAN12	3.491088067	1.24E-03	0.01780902	-1.22779375
GJD3	-3.490891333	1.24E-03	0.01780902	0.8273185
KIF13A	3.489947233	1.24E-03	0.017842404	-0.4216755
MATN3	-3.48939783	1.25E-03	0.017855946	0.2529043
NOL14	3.488698854	1.25E-03	0.017870416	-0.9017603
CSNK2B	-3.488269997	1.25E-03	0.017870416	0.42783995
PLCH1	-3.488529044	1.25E-03	0.017870416	0.7131548
EXOSC8	3.48765292	1.25E-03	0.017887436	-0.926204
GM1967	-3.486260262	1.26E-03	0.017943722	0.6210516
D17WSU92E	-3.485896132	1.26E-03	0.017948008	0.57861855
2810422O20RIK	3.484441312	1.26E-03	0.017971856	-0.67231375
OLFR498	3.484676574	1.26E-03	0.017971856	-0.3906203
MLLT10	-3.484309677	1.26E-03	0.017971856	0.52413825
LOC100047762	-3.484824695	1.26E-03	0.017971856	0.90360675
IL3RA	-3.483434492	1.27E-03	0.018002143	0.74023655
KLK1B22	-3.481625714	1.27E-03	0.018055113	0.47327385
CREBL2	-3.481855908	1.27E-03	0.018055113	0.6887992
POLR3F	-3.481558882	1.27E-03	0.018055113	0.8808682
MTUS1	3.480784056	1.28E-03	0.018080452	-0.5740402
MTIF2	3.477400114	1.29E-03	0.018236395	-0.24865625
2410015M20RIK	-3.477184132	1.29E-03	0.018236395	0.678552
MLYCD	3.47659728	1.29E-03	0.018252326	-0.8893951
AGXT	-3.475530047	1.29E-03	0.018293037	0.7093807
ASCL1	-3.474923743	1.30E-03	0.018310037	0.67367355
BRP44	3.473177715	1.30E-03	0.018386032	-0.4625914
EVI2B	-3.472617915	1.31E-03	0.018400721	0.3736513
CUL1	3.47180378	1.31E-03	0.018428635	-0.8537337
BC031575	3.471302907	1.31E-03	0.018440313	-0.8863867
SUPT5H	-3.468910313	1.32E-03	0.018550615	0.41456505
SLC25A17	3.468558307	1.32E-03	0.018554602	-0.9865337
SCYL1	3.467884735	1.32E-03	0.018575418	-0.82312345
BRCA2	-3.467481633	1.32E-03	0.018582105	0.5490569
RBP4	3.466195823	1.33E-03	0.018606249	-1.4334665
GM2A	3.466203268	1.33E-03	0.018606249	-0.97085625
SPRR1A	-3.466583466	1.33E-03	0.018606249	0.49562165
GTF3C5	3.465376667	1.33E-03	0.018620589	-0.45876145
RHOX12	3.465373383	1.33E-03	0.018620589	-0.4449266
PPP5C	3.46458748	1.34E-03	0.018641085	-0.538837
ACCS	-3.464434621	1.34E-03	0.018641085	0.7404539
OLFR214	-3.463767665	1.34E-03	0.018661734	0.6320777
OLFR1040	3.462229168	1.34E-03	0.018723554	-0.3558552
2610034B18RIK	-3.46204595	1.34E-03	0.018723554	0.39747005
4833423E24RIK	-3.460705685	1.35E-03	0.018773188	0.58631385
COX8B	-3.460559188	1.35E-03	0.018773188	2.4280446
STAM	-3.460206301	1.35E-03	0.018777419	0.5464261
CLK1	3.459646015	1.35E-03	0.018778226	-0.75897185
WTAP	-3.459866172	1.35E-03	0.018778226	0.3637787
DIRC2	3.459160159	1.36E-03	0.018789519	-0.5785415
RECQL5	3.458358254	1.36E-03	0.018799276	-0.8660611
SEPHS1	3.458195172	1.36E-03	0.018799276	-0.6009688
IFT80	3.458160215	1.36E-03	0.018799276	-0.3592856
AA517853	-3.456660253	1.37E-03	0.018864363	0.84376165
AHR	3.456125223	1.37E-03	0.018878365	-0.3031993
TMEM120B	3.455297523	1.37E-03	0.018893544	-1.0833701
4933429F08RIK	-3.455390044	1.37E-03	0.018893544	0.43660445
STEAP4	3.454825899	1.37E-03	0.018904225	-0.37194795
1810031K17RIK	3.454284932	1.37E-03	0.018907251	-0.66866845
HIBCH	-3.454228189	1.37E-03	0.018907251	0.45657705
CYLD	3.453620789	1.38E-03	0.018910835	-1.1505689
OLFR592	-3.453761173	1.38E-03	0.018910835	0.2361597
V1RC16	-3.450652657	1.39E-03	0.019054853	0.87740995
CDCA7	3.445483484	1.41E-03	0.019319031	-0.66641375
BPHL	-3.444349024	1.41E-03	0.019361042	0.3977549
ZFAND2B	-3.444171293	1.41E-03	0.019361042	0.45924435
THAP7	-3.443892285	1.42E-03	0.019361576	0.38239785
1200014M14RIK	-3.443431366	1.42E-03	0.019372016	0.37042965
POLR3A	-3.442201792	1.42E-03	0.019424358	0.3706015
OLFR1113	-3.441880935	1.42E-03	0.019427206	0.633017
ISY1	3.44094532	1.43E-03	0.019463636	-0.49126745
CSGALNACT2	-3.440099634	1.43E-03	0.019495216	0.79055865
SLTM	3.438585244	1.44E-03	0.01953413	-0.6992804
IFT81	3.438573571	1.44E-03	0.01953413	-0.53675585
RSL1D1	3.438318029	1.44E-03	0.01953413	-0.4735252
NLRP9A	-3.438542415	1.44E-03	0.01953413	0.4177726
TC2N	-3.438049537	1.44E-03	0.019534192	0.5871876
XPNPEP3	3.437491278	1.44E-03	0.019550159	-0.71673835
TRP53	3.436626401	1.44E-03	0.019582993	-0.9824315
D9ERTD402E	-3.436100194	1.45E-03	0.019597254	0.5520015
CASK	3.433929217	1.46E-03	0.019681815	-1.00265295
IGF2BP2	3.433463796	1.46E-03	0.019681815	-0.7456649
5430419D17RIK	3.432968933	1.46E-03	0.019681815	-0.6259466
SETDB2	3.433717388	1.46E-03	0.019681815	-0.386885
SIGLECE	-3.432968616	1.46E-03	0.019681815	0.3254293
CMA1	-3.432969094	1.46E-03	0.019681815	0.54988885
TSPAN31	3.43188804	1.46E-03	0.019712186	-0.4970247
CLCN6	-3.432049115	1.46E-03	0.019712186	0.4836114
VHLH	3.431499139	1.47E-03	0.019719028	-0.4870539
V1RH1	3.431111021	1.47E-03	0.019725839	-0.4795713
1110038D17RIK	3.429524708	1.47E-03	0.019725858	-1.2102929
NUTF2	3.430770204	1.47E-03	0.019725858	-0.41994375
ARSJ	3.429691234	1.47E-03	0.019725858	-0.3223732
OLFR64	-3.430003624	1.47E-03	0.019725858	0.4014636
BC008155	-3.429551383	1.47E-03	0.019725858	0.43870105
OLFR54	-3.429565756	1.47E-03	0.019725858	0.71697665
CDH3	-3.427738318	1.48E-03	0.019810255	0.49553795
HIVEP1	-3.425890554	1.49E-03	0.019883742	0.51840905
OLFR1093	-3.426036827	1.49E-03	0.019883742	0.56368275
SEC16B	3.424573243	1.49E-03	0.019927875	-1.38035065
B930011P16RIK	-3.424687375	1.49E-03	0.019927875	0.7490594
XPO7	-3.422697585	1.50E-03	0.020018139	0.3671691
GPR61	3.421721457	1.51E-03	0.02005819	-0.4105345
ENTPD3	-3.420379719	1.51E-03	0.02011892	0.6927871
TAS2R113	-3.419950011	1.51E-03	0.02012835	0.28909175
AURKAIP1	-3.419527674	1.52E-03	0.020137378	0.33088485
EIF2AK1	3.419164967	1.52E-03	0.020142096	-0.4659458
AKTIP	-3.418920109	1.52E-03	0.020142096	0.6597807
PRUNE	3.418365003	1.52E-03	0.020158654	-0.36276235
DEFCR4	-3.418072645	1.52E-03	0.020160396	0.32242705
9930023K05RIK	-3.416485796	1.53E-03	0.02023536	0.8733356
DDEF2	3.413676715	1.54E-03	0.020380201	-0.4062483
SH3BGRL	3.409557303	1.56E-03	0.020428265	-0.86379945
CPSF1	3.409741311	1.56E-03	0.020428265	-0.7232851
GLDN	3.410009482	1.56E-03	0.020428265	-0.52383295
5630401D24RIK	3.409990801	1.56E-03	0.020428265	-0.48714905
OLFR307	3.411560112	1.55E-03	0.020428265	-0.25335565
NPL	-3.410231265	1.56E-03	0.020428265	0.40242855
DLST	-3.409584017	1.56E-03	0.020428265	0.42848905
OLFR1099	-3.411462116	1.55E-03	0.020428265	0.4720306
TATDN1	-3.410903009	1.55E-03	0.020428265	0.5140483
OLFR1249	-3.411402642	1.55E-03	0.020428265	0.5595649
DRP2	-3.409652305	1.56E-03	0.020428265	0.59570185
OLFR1234	-3.409454787	1.56E-03	0.020428265	0.6985986
DNALC1	-3.411991021	1.55E-03	0.020428265	0.98682685
NNMT	-3.408483707	1.56E-03	0.020469009	0.79926755
LOC100045617	3.407161445	1.57E-03	0.020529994	-1.132699
FKBP9	3.406375552	1.57E-03	0.020560298	-1.0084181
OLFR1426	-3.405603322	1.58E-03	0.020589866	0.23777755
MIF4GD	3.405241104	1.58E-03	0.020595859	-0.57085675
FEZ2	3.403497381	1.59E-03	0.020626003	-1.20734985
EXOSC7	3.403429949	1.59E-03	0.020626003	-0.6873837
ARPC5L	3.403900744	1.58E-03	0.020626003	-0.5857065
CBX6	-3.403630626	1.58E-03	0.020626003	0.2818617
BB287469	-3.404214207	1.58E-03	0.020626003	0.57759025
1700049G17RIK	3.402610607	1.59E-03	0.020653389	-0.33936825
SLC25A31	-3.402441252	1.59E-03	0.020653389	0.2270409
SGSM3	3.401813406	1.59E-03	0.020660002	-0.8328927
ZFP319	-3.401911798	1.59E-03	0.020660002	0.34573425
SLC38A4	3.401350489	1.59E-03	0.020668832	-0.90539815
UBFD1	3.400934861	1.60E-03	0.020668832	-0.54320575
TMEM74	-3.400891839	1.60E-03	0.020668832	0.24069265
NOLA3	3.399423954	1.60E-03	0.020679822	-0.8367521
C87499	3.399775941	1.60E-03	0.020679822	-0.23688555
RCVRN	-3.399547894	1.60E-03	0.020679822	0.57684985
PIRA11	-3.39956555	1.60E-03	0.020679822	0.64328265
GDF9	-3.399524736	1.60E-03	0.020679822	0.89629315
LOC100041466	-3.397941473	1.61E-03	0.020750861	0.3237385
BC038156	3.396261186	1.62E-03	0.020762266	-0.79806695
CAMK1D	3.396274136	1.62E-03	0.020762266	-0.31407275
MAGEB18	-3.396299651	1.62E-03	0.020762266	0.41198325
KCND1	-3.396218098	1.62E-03	0.020762266	0.57136525
HES5	-3.39640707	1.62E-03	0.020762266	0.73214635
MTMR6	-3.397421447	1.61E-03	0.020762266	0.9119452
LOC100048589	3.394188485	1.63E-03	0.020792684	-0.7766216
ACTR1B	3.393415381	1.63E-03	0.020792684	-0.6504333
OXSR1	3.393899294	1.63E-03	0.020792684	-0.48660455
HOXA9	3.393820948	1.63E-03	0.020792684	-0.34854645
COL24A1	-3.394910324	1.62E-03	0.020792684	0.31076215
AURKC	-3.39483088	1.62E-03	0.020792684	0.3441355
ADAM8	-3.393627283	1.63E-03	0.020792684	0.35648255
NOBOX	-3.393624893	1.63E-03	0.020792684	0.6672562
OLFR965	-3.395037337	1.62E-03	0.020792684	0.8196458
SAMD4	-3.391544297	1.64E-03	0.020886861	0.33973845
OLFR902	-3.391032243	1.64E-03	0.020889405	0.39832615
PSG28	-3.390996428	1.64E-03	0.020889405	0.6505454
SP2	-3.390616165	1.64E-03	0.020896893	0.5559548
AZI1	3.389923917	1.65E-03	0.020914445	-0.8629035
SMARCC1	-3.389812125	1.65E-03	0.020914445	0.35215435
EMP2	3.388935093	1.65E-03	0.020936312	-0.84598755
E430002D04RIK	-3.389010933	1.65E-03	0.020936312	0.7923121
CXCL11	-3.385901309	1.66E-03	0.021099489	0.3454206
LOC100045644	3.384349462	1.67E-03	0.021176187	-0.3507212
FABP1	-3.384095704	1.67E-03	0.02117636	0.44180745
CCDC97	-3.382939953	1.68E-03	0.021229876	0.63264805
FCF1	3.38082984	1.69E-03	0.02130938	-1.0097779
RAE1	3.379874168	1.69E-03	0.02130938	-0.5252058
ZFP583	3.38029004	1.69E-03	0.02130938	-0.41737045
ANKRD55	3.379740298	1.69E-03	0.02130938	-0.25963575
OLFR577	-3.379599542	1.69E-03	0.02130938	0.32721495
1700028K03RIK	-3.380576831	1.69E-03	0.02130938	0.35885565
A530016O06RIK	-3.380536791	1.69E-03	0.02130938	0.4114675
LOC100041290	-3.380022734	1.69E-03	0.02130938	1.00768115
SLC29A3	3.379136278	1.70E-03	0.021322096	-0.87158945
OLFR114	3.377941807	1.70E-03	0.021363523	-0.28087805
A4GNT	-3.377969204	1.70E-03	0.021363523	0.2884066
AR	3.376715028	1.71E-03	0.021421824	-0.7788055
OLFR195	-3.376430811	1.71E-03	0.021423949	0.25483445
LCE1A2	-3.375726708	1.71E-03	0.021451163	0.6615539
HIST1H2BN	3.37409535	1.72E-03	0.021533503	-0.8335507
CPNE9	3.37360689	1.72E-03	0.021533503	-0.49479785
LOC192758	3.373769331	1.72E-03	0.021533503	-0.4901501
LYPD5	-3.372617275	1.73E-03	0.021578034	0.48638305
SMR2	-3.372355825	1.73E-03	0.021578859	0.50898685
GABARAPL2	-3.370767516	1.74E-03	0.021659572	0.67455305
MCM7	3.370474867	1.74E-03	0.021662299	-0.72114555
ST5	3.368641613	1.75E-03	0.021746927	-1.0266745
KCNA2	3.368579851	1.75E-03	0.021746927	-0.5566792
LMAN1L	-3.367367327	1.75E-03	0.021805448	0.36054085
TIMM17B	3.366504768	1.76E-03	0.021827852	-0.6753244
DNAJB7	3.366546553	1.76E-03	0.021827852	-0.5791239
GLO1	3.365673546	1.76E-03	0.021831443	-1.0435142
TMEM49	3.365256979	1.76E-03	0.021831443	-0.7644496
BCAP31	3.365258866	1.76E-03	0.021831443	-0.7367953
BC022623	-3.365076614	1.76E-03	0.021831443	0.3392926
OLFR32	-3.364723181	1.77E-03	0.021831443	0.5582712
TRP53RK	-3.364796914	1.77E-03	0.021831443	0.62774055
ZFP777	-3.366182729	1.76E-03	0.021831443	0.71276565
1700065D16RIK	-3.363689542	1.77E-03	0.021864444	0.50945175
ERCC5	-3.36384826	1.77E-03	0.021864444	0.6904839
OLFR1261	-3.363024559	1.77E-03	0.021889996	0.6257044
CTSB	3.3607489	1.79E-03	0.021984723	-1.751861
TAS2R105	3.36100568	1.78E-03	0.021984723	-0.4700942
PRDM8	-3.360737499	1.79E-03	0.021984723	0.18432435
2610039C10RIK	3.35985529	1.79E-03	0.022008778	-0.8029685
PCDHB14	3.359994695	1.79E-03	0.022008778	-0.30216535
DHRSX	3.359100596	1.79E-03	0.022040036	-0.46419705
B3GNT2	3.358171925	1.80E-03	0.022082023	-0.27466625
EDA2R	-3.356966242	1.80E-03	0.022141135	0.8328562
NDRL	3.355997841	1.81E-03	0.02218577	-0.90591755
U2AF1L4	-3.354163066	1.82E-03	0.02228408	0.67171835
CP	3.353821306	1.82E-03	0.02229016	-0.8992666
WDR68	3.353040387	1.82E-03	0.022323471	-0.3244076
IFT57	3.352528709	1.83E-03	0.022340122	-0.2125746
SLC37A4	3.35089624	1.84E-03	0.022426503	-0.8919795
4930502E18RIK	-3.350227794	1.84E-03	0.022453017	0.70859545
LOC100048613	3.349468867	1.84E-03	0.022457583	-1.892593
FADD	-3.349530197	1.84E-03	0.022457583	0.3740096
ERAS	-3.349426394	1.84E-03	0.022457583	0.70124745
STK17B	3.349113565	1.84E-03	0.022461974	-0.82887255
GFRA2	3.348645575	1.85E-03	0.022476058	-0.28463355
CPLX1	-3.34838162	1.85E-03	0.022477421	0.67667645
REX3	3.347304432	1.85E-03	0.022529605	-0.4257284
JPH1	3.346772016	1.86E-03	0.02253478	-0.4607022
FANCC	3.346496671	1.86E-03	0.02253478	-0.3885038
DEPDC1B	-3.346510822	1.86E-03	0.02253478	0.3731076
TPCN2	3.346216883	1.86E-03	0.022537183	-0.9300307
V1RE13	-3.345907967	1.86E-03	0.022540486	0.30218135
DDX59	-3.345681829	1.86E-03	0.022540486	0.3697554
2310065K24RIK	3.34458792	1.87E-03	0.022548695	-0.47963565
HCK	-3.344828524	1.87E-03	0.022548695	0.36063355
V1RC15	-3.344671026	1.87E-03	0.022548695	0.48337895
ZFP647	-3.344764138	1.87E-03	0.022548695	0.50129865
SPRR2D	-3.343844092	1.87E-03	0.022580225	0.48310055
ANKRD13A	3.33983253	1.89E-03	0.022737967	-0.8217577
TMEM66	3.340472384	1.89E-03	0.022737967	-0.72132535
MYG1	3.33998256	1.89E-03	0.022737967	-0.5419195
SAS	3.34016695	1.89E-03	0.022737967	-0.44689955
C5AR1	-3.339983905	1.89E-03	0.022737967	0.2891371
OLFR1200	-3.339656627	1.89E-03	0.022737967	0.56037895
SLC25A25	-3.33994964	1.89E-03	0.022737967	0.9570737
ALG2	3.33846014	1.90E-03	0.022794123	-0.68012345
ZMAT2	3.338289002	1.90E-03	0.022794123	-0.44543715
TXK	-3.337978867	1.90E-03	0.022798626	0.661842
SCCPDH	3.336976694	1.91E-03	0.022816737	-0.71315105
RRN3	3.337043607	1.91E-03	0.022816737	-0.67775335
MT1	-3.337071459	1.91E-03	0.022816737	1.21398475
OLFR808	-3.335266413	1.92E-03	0.022910038	0.5182529
TBKBP1	-3.33502067	1.92E-03	0.022910517	0.79875415
PDCD5	3.334426435	1.92E-03	0.022933148	-0.42087055
DND1	3.333851496	1.92E-03	0.02295458	-0.5873685
2700055A20RIK	3.333255352	1.93E-03	0.022964809	-1.0389364
GRINL1A	-3.333047042	1.93E-03	0.022964809	0.30276695
C1R	-3.332977885	1.93E-03	0.022964809	0.58987145
HSPD1	3.331377176	1.94E-03	0.023037246	-1.03013285
DLX4	3.33136681	1.94E-03	0.023037246	-0.21248865
3110023B02RIK	3.330486244	1.94E-03	0.023048088	-0.562292
TLOC1	-3.330645277	1.94E-03	0.023048088	0.2493266
4930430A15RIK	-3.330914848	1.94E-03	0.023048088	0.83483745
SNRPD3	3.330106249	1.94E-03	0.023057244	-0.5700317
IFI44	3.329325933	1.95E-03	0.023076893	-0.2698402
TNFSF8	-3.329416533	1.95E-03	0.023076893	0.429072
9530091C08RIK	-3.327923778	1.96E-03	0.023151537	0.7458593
RBM6	-3.327419663	1.96E-03	0.023168728	0.3898293
NOS2	3.326782924	1.96E-03	0.023194457	-0.5298246
HMGB2L1	3.326504884	1.96E-03	0.02319717	-0.53063205
IL1RL2	-3.325513319	1.97E-03	0.023245771	0.87484795
NAIP1	3.325195235	1.97E-03	0.023251084	-0.38984445
MTMR9	3.324872529	1.97E-03	0.023256705	-0.54624835
RXFP1	-3.324149973	1.98E-03	0.023288099	0.22331185
CRBN	3.322741924	1.98E-03	0.023363828	-0.46622705
SLC7A1	-3.322348262	1.99E-03	0.023374089	0.6544225
V1RI8	-3.321845865	1.99E-03	0.023391401	0.4247961
AGTRAP	3.32043324	2.00E-03	0.023452536	-0.8275493
COL1A2	-3.320624625	2.00E-03	0.023452536	0.83804785
OLFR788	3.319394224	2.00E-03	0.023504797	-0.4222462
OLFR538	-3.318975468	2.00E-03	0.023516792	0.5193019
PAFAH1B1	3.317912417	2.01E-03	0.023558592	-0.5486544
SHCBP1	-3.317865171	2.01E-03	0.023558592	0.27560935
RASSF7	3.316991601	2.02E-03	0.023559614	-0.99920755
RAB6	3.316409407	2.02E-03	0.023559614	-0.37107365
4930511H11RIK	3.315810235	2.02E-03	0.023559614	-0.28585105
IFIT1	-3.317114929	2.02E-03	0.023559614	0.26425655
DISC1	-3.316186431	2.02E-03	0.023559614	0.394087
OLFR765	-3.316209027	2.02E-03	0.023559614	0.43061385
MRM1	-3.31574926	2.02E-03	0.023559614	0.5089805
GPAM	-3.317426753	2.01E-03	0.023559614	0.88047335
MYL2	-3.316289994	2.02E-03	0.023559614	2.30591765
NOPE	3.315170593	2.03E-03	0.023567011	-0.7866888
SLK	3.315226777	2.03E-03	0.023567011	-0.3406795
ZCCHC14	3.313918283	2.03E-03	0.023602124	-0.82292475
LRIG1	3.313703463	2.03E-03	0.023602124	-0.723302
OLFR1057	-3.314316281	2.03E-03	0.023602124	0.32557045
OLFR1106	-3.314052328	2.03E-03	0.023602124	0.72866165
MOAP1	3.313349646	2.04E-03	0.023610086	-0.40858615
CYP4F15	-3.312683812	2.04E-03	0.023638438	0.6935543
NCOR1	-3.311869821	2.04E-03	0.023676523	0.6715449
MAPKAPK3	3.31130141	2.05E-03	0.023698584	-0.7998262
SGK2	-3.309138709	2.06E-03	0.0238254	0.53113315
SLC19A1	3.308514687	2.06E-03	0.02385127	-0.88232555
B020004J07RIK	-3.30712995	2.07E-03	0.023927401	0.3435956
NLRP9C	-3.305260764	2.08E-03	0.024035904	0.4873095
LOC100040402	-3.304689081	2.09E-03	0.024043211	0.5148966
OLFR799	-3.304889167	2.08E-03	0.024043211	0.55912405
GUCY2G	-3.303711188	2.09E-03	0.024092871	0.73385355
SLC25A42	3.301929107	2.10E-03	0.024180908	-1.2100028
DGKQ	3.302139324	2.10E-03	0.024180908	-1.14228605
EEF1A1	3.301064726	2.11E-03	0.024223269	-0.73047265
LIAS	-3.300282453	2.11E-03	0.024244816	0.52006335
OLFR419	-3.300332086	2.11E-03	0.024244816	0.58732665
4732473B16RIK	-3.299605817	2.12E-03	0.024274726	0.62952635
LEAP2	-3.29859027	2.12E-03	0.024301899	0.3929159
LRRFIP1	-3.298899898	2.12E-03	0.024301899	0.4440296
PNP1	-3.298511581	2.12E-03	0.024301899	0.71119655
PCDHGA5	-3.298114684	2.12E-03	0.024313138	0.5019986
MARK1	-3.297835802	2.13E-03	0.024316471	0.5609185
XLR3B	-3.297599661	2.13E-03	0.024316947	0.656576
ERMP1	3.295632732	2.14E-03	0.02441809	-0.875846
EG666085	-3.295826398	2.14E-03	0.02441809	0.37423385
9130218O11RIK	-3.295179937	2.14E-03	0.02441809	0.7630067
GM1040	-3.295306458	2.14E-03	0.02441809	0.85685125
BMPR1A	3.29473471	2.14E-03	0.024432695	-0.376771
PCYOX1	3.294252945	2.15E-03	0.02444978	-0.5471609
MINA	3.293791277	2.15E-03	0.024465528	-0.8814283
2310022B05RIK	3.293344211	2.15E-03	0.024480309	-0.7087928
LOC100043391	3.292597269	2.16E-03	0.024515368	-0.55587445
ETFA	3.291602993	2.16E-03	0.024567225	-1.036438
CMTM8	-3.291000061	2.17E-03	0.024592652	0.5623589
GPRASP1	3.290470029	2.17E-03	0.024613165	-0.53175835
GFM1	3.290064995	2.17E-03	0.024625218	-0.58157555
ATPBD3	3.28913764	2.18E-03	0.024672774	-0.39199705
IK	3.28745419	2.19E-03	0.024771977	-0.40096325
GRHPR	3.28674576	2.19E-03	0.02480485	-1.5700527
PNRC2	3.285895472	2.20E-03	0.02484748	-0.6136764
BC030396	-3.285380567	2.20E-03	0.024867204	0.7245565
TMEM16D	-3.284939317	2.20E-03	0.024881903	0.3858485
BC005682	3.283476214	2.21E-03	0.024885648	-1.00178465
ZC3H15	3.28364962	2.21E-03	0.024885648	-0.6775759
TM9SF4	3.283971412	2.21E-03	0.024885648	-0.48246295
OLFR921	3.283376903	2.21E-03	0.024885648	-0.2489344
KLK1B11	-3.283525904	2.21E-03	0.024885648	0.55971065
TMEM47	-3.283301476	2.21E-03	0.024885648	0.65136365
OLFR386	-3.283326734	2.21E-03	0.024885648	0.69223915
ENSMUSG00000068790	-3.282440105	2.22E-03	0.024929248	0.76482395
CFI	3.281729362	2.22E-03	0.024931622	-1.6753196
CHUK	3.281974407	2.22E-03	0.024931622	-1.07270085
4930515G01RIK	3.281895273	2.22E-03	0.024931622	-0.4823664
COX6B1	3.280255271	2.23E-03	0.025017488	-0.50274725
ZFP108	-3.279708384	2.23E-03	0.02503966	0.70973285
QSOX2	-3.279351581	2.24E-03	0.025048752	0.48580175
PSMB3	3.278689944	2.24E-03	0.025078886	-1.00858715
PON1	3.277500601	2.25E-03	0.025130016	-1.769961
SMPD4	3.277593178	2.25E-03	0.025130016	-0.6086147
NICN1	3.276881025	2.25E-03	0.025137848	-0.68225565
GPR44	-3.276879072	2.25E-03	0.025137848	0.3397388
ZFP512	-3.276714505	2.25E-03	0.025137848	0.3840123
FRAT2	3.27627993	2.26E-03	0.025144437	-0.4630929
ISOC2B	-3.276171334	2.26E-03	0.025144437	0.56896435
PRRT3	-3.274755295	2.27E-03	0.025227039	0.2648227
ETV5	-3.273774677	2.27E-03	0.025279614	1.0575978
CLCA4	-3.27323141	2.27E-03	0.02530185	0.4831822
DPEP2	-3.271330191	2.29E-03	0.025418845	0.7602013
MRPL50	3.271014802	2.29E-03	0.025425278	-0.69133815
GP1BB	-3.270365758	2.29E-03	0.025455058	0.4991273
SLC19A3	-3.270111795	2.29E-03	0.025457217	0.4082285
PLEK	3.269753496	2.30E-03	0.025466689	-0.3585817
PTGES3	3.268213075	2.31E-03	0.025479799	-0.84038575
TMEM106A	3.268228667	2.31E-03	0.025479799	-0.8178345
GOLIM4	3.268710612	2.30E-03	0.025479799	-0.5407508
PSME4	3.267853176	2.31E-03	0.025479799	-0.3408788
LGR6	-3.269128547	2.30E-03	0.025479799	0.27745905
RNF111	-3.267787033	2.31E-03	0.025479799	0.4534186
SEMA3B	-3.268380633	2.31E-03	0.025479799	0.54236815
PRSS36	-3.26906985	2.30E-03	0.025479799	0.5522654
SPIC	3.265609832	2.32E-03	0.02560146	-0.4117336
2310003H01RIK	-3.26580353	2.32E-03	0.02560146	0.653923
GRM7	-3.265258734	2.33E-03	0.025610568	0.3973896
OLFR472	-3.264063452	2.33E-03	0.025674163	0.388844
FGF15	-3.263913002	2.33E-03	0.025674163	0.6005431
BC026782	-3.263277399	2.34E-03	0.025703396	0.3202173
POLR2G	3.262487866	2.34E-03	0.025743549	-0.85253125
2700007P21RIK	3.262180554	2.34E-03	0.025749649	-0.4548207
PUS3	3.261582904	2.35E-03	0.025760678	-0.7864242
SLC14A1	-3.261683639	2.35E-03	0.025760678	0.32738045
PRB1	-3.261132767	2.35E-03	0.025761311	0.3858884
DAZL	-3.261157122	2.35E-03	0.025761311	0.60628565
ZHX3	3.258518972	2.37E-03	0.025886628	-0.8836265
OLFR1371	3.258878725	2.37E-03	0.025886628	-0.36028425
OVOL1	-3.258638604	2.37E-03	0.025886628	0.5904287
SLC4A10	-3.258484064	2.37E-03	0.025886628	0.61043265
GLUL	3.257353988	2.38E-03	0.025951368	-0.64753715
ZBTB44	-3.256308807	2.38E-03	0.026010208	0.6276097
PHF15	-3.254790845	2.39E-03	0.026103015	0.6649937
OLFR283	-3.254564179	2.39E-03	0.026103516	0.3337161
PRTG	-3.253719588	2.40E-03	0.026148311	0.46110225
RFC3	3.25199256	2.41E-03	0.026225093	-0.51154115
TMEM178	3.252206087	2.41E-03	0.026225093	-0.50644225
KLHL28	-3.252259616	2.41E-03	0.026225093	0.2192845
PPP2R2D	3.251316092	2.42E-03	0.026251708	-0.74665875
GM1673	-3.251184596	2.42E-03	0.026251708	0.95731775
ZFP688	3.249377203	2.43E-03	0.026310646	-0.73850645
CRCP	-3.250012438	2.42E-03	0.026310646	0.6054843
LOC234911	-3.249411466	2.43E-03	0.026310646	0.71290625
TAS1R2	-3.249829168	2.43E-03	0.026310646	0.8950778
USP2	-3.249273618	2.43E-03	0.026310646	1.0355975
HOXB13	3.248986061	2.43E-03	0.026315645	-0.37320745
2810021B07RIK	3.247407137	2.44E-03	0.026413981	-0.7548112
RREB1	3.24554282	2.45E-03	0.026482106	-0.62470865
1700021F05RIK	-3.245378135	2.46E-03	0.026482106	0.4059948
OLFR60	-3.245591756	2.45E-03	0.026482106	0.70478295
PCDHB19	-3.245841739	2.45E-03	0.026482106	0.74187725
TMEM161B	-3.245851572	2.45E-03	0.026482106	0.7510511
PRTN3	3.244941576	2.46E-03	0.0264887	-1.47063195
BARX2	-3.244754669	2.46E-03	0.0264887	0.449452
HIVEP3	-3.244635297	2.46E-03	0.0264887	0.5409475
CDK6	-3.242922511	2.47E-03	0.026581647	0.6660527
OLFR714	-3.243044646	2.47E-03	0.026581647	0.6940917
CCDC53	3.242678312	2.47E-03	0.026583637	-0.6445481
9630033F20RIK	-3.242139937	2.48E-03	0.026607063	0.88029355
LSM3	3.241259508	2.48E-03	0.026655474	-0.6339539
SLAIN2	3.240989532	2.49E-03	0.026659375	-0.66679445
ZFP142	3.240473151	2.49E-03	0.026681281	-0.2945315
KEAP1	-3.240244726	2.49E-03	0.026682167	0.34651895
CSN2	-3.239862527	2.49E-03	0.026694298	0.7496512
OLFR813	-3.239449225	2.50E-03	0.026708716	0.27985375
TIPARP	3.23912856	2.50E-03	0.026716374	-0.4879552
5031408O05RIK	3.238510016	2.50E-03	0.026745843	-0.2858168
LOC100046355	-3.238194727	2.50E-03	0.026753134	0.3453138
1600014C10RIK	3.236668128	2.51E-03	0.026817426	-0.95103695
IFRD2	3.236547773	2.52E-03	0.026817426	-0.6298893
TMEM101	-3.236456015	2.52E-03	0.026817426	0.6002723
UGT1A2	-3.236971296	2.51E-03	0.026817426	0.6447266
CASP7	3.236176344	2.52E-03	0.026822162	-0.43657655
PUS1	-3.235866912	2.52E-03	0.026829092	0.4658152
4933440H19RIK	-3.233623784	2.54E-03	0.026978383	0.46595965
LRDD	3.232826484	2.54E-03	0.027005534	-0.62413215
CTSS	3.233025918	2.54E-03	0.027005534	-0.3319371
sep-03	-3.232591323	2.54E-03	0.027007051	0.45402585
SYT6	-3.231992071	2.55E-03	0.027035487	0.4674472
CASS4	-3.231710488	2.55E-03	0.027040455	0.5871766
ATP2A1	-3.231355351	2.55E-03	0.027050874	2.7473019
RBM16	-3.230576735	2.56E-03	0.027092661	0.4197052
OBOX3	3.229974847	2.56E-03	0.027105546	-0.248062
DCTN2	-3.229982474	2.56E-03	0.027105546	0.32238595
2310009E04RIK	3.227733401	2.58E-03	0.027256212	-0.81394175
IL23A	-3.227501829	2.58E-03	0.027257539	0.66368975
E330026B02RIK	-3.226780831	2.58E-03	0.027295363	0.6672725
NECAB1	-3.226037526	2.59E-03	0.027311727	0.2981424
BRF1	-3.226222271	2.59E-03	0.027311727	0.5341799
SPRR3	-3.225921251	2.59E-03	0.027311727	0.7300533
PCDHB13	-3.225508313	2.59E-03	0.027326639	0.4367645
E130009J12RIK	-3.225021672	2.60E-03	0.027347073	0.58846065
MYO1G	3.224116884	2.60E-03	0.027398814	-0.656479
PTPN21	3.222958036	2.61E-03	0.02744395	-0.72646215
BHMT	-3.222876063	2.61E-03	0.02744395	0.4298071
PTPLAD2	-3.223285454	2.61E-03	0.02744395	0.5949997
UBXD8	3.222277135	2.62E-03	0.02747293	-0.89616305
HPCAL4	3.222048576	2.62E-03	0.027474141	-0.4795796
YTHDF1	3.221381782	2.62E-03	0.027508264	-0.2277749
SLC2A5	-3.221014881	2.62E-03	0.027519888	0.2865816
GTF2H2	3.219360011	2.64E-03	0.027532863	-0.4134378
DIMT1	-3.219928535	2.63E-03	0.027532863	0.3187419
TRMT11	-3.220573999	2.63E-03	0.027532863	0.34708135
CEND1	-3.219809809	2.63E-03	0.027532863	0.6216719
KIF12	-3.219599027	2.63E-03	0.027532863	0.62251965
DSCR1L2	-3.219643812	2.63E-03	0.027532863	0.69996175
ARID3A	-3.219424681	2.64E-03	0.027532863	0.8516326
FZD10	-3.218730217	2.64E-03	0.02756434	0.46982255
TGIF2	-3.217930899	2.65E-03	0.027592728	0.48922715
BATF	-3.218024469	2.65E-03	0.027592728	0.64696375
ARNT2	3.216678426	2.66E-03	0.02767128	-0.354007
POLR1E	3.215299326	2.67E-03	0.027750123	-0.548899
DLGAP1	3.21521419	2.67E-03	0.027750123	-0.39670025
ARL4D	-3.214813625	2.67E-03	0.027764505	0.80137815
TTK	-3.213973608	2.68E-03	0.027812228	0.39150915
IGSF11	3.213538294	2.68E-03	0.027829294	-0.49763875
ATP5E	3.213218369	2.68E-03	0.027837613	-0.7037525
LOC666904	3.212216259	2.69E-03	0.027877506	-1.77294135
PCGF5	3.211737382	2.69E-03	0.027877506	-0.47580615
HEY2	-3.211643239	2.69E-03	0.027877506	0.45815785
MPP5	-3.211971541	2.69E-03	0.027877506	0.5261984
DACH2	-3.212450406	2.69E-03	0.027877506	0.5466943
KCNQ2	-3.211225917	2.70E-03	0.027893296	0.40101035
NFKBIL1	3.210946915	2.70E-03	0.027898577	-0.64937065
TCF21	3.210235497	2.70E-03	0.027926995	-0.6799971
CENTD2	-3.210154731	2.70E-03	0.027926995	0.3580775
EDNRA	3.209178374	2.71E-03	0.027985469	-0.42292675
4930478A21RIK	-3.207658282	2.72E-03	0.028085663	0.321077
MGAT4A	-3.206155899	2.73E-03	0.02816879	0.2352953
PVALB	-3.206333595	2.73E-03	0.02816879	2.60091615
ANKMY1	-3.20568415	2.74E-03	0.028188976	0.4244871
SMG5	3.203953986	2.75E-03	0.028293058	-0.58990455
D930020B18RIK	-3.203914102	2.75E-03	0.028293058	0.49417905
9530015I07RIK	-3.203575438	2.75E-03	0.028303085	0.85288565
GM776	-3.203351015	2.75E-03	0.028304313	0.7048943
GTF2F1	-3.202587278	2.76E-03	0.028347166	0.6650497
CTNNAL1	3.201261119	2.77E-03	0.028417491	-0.59610565
IRS1	-3.20137718	2.77E-03	0.028417491	0.89094645
AI467606	3.200713538	2.77E-03	0.028443777	-0.7982126
OLFR1295	-3.200054822	2.78E-03	0.028478711	0.26676435
TCF1	3.199547676	2.78E-03	0.028501927	-0.2393956
PLLP	3.198361614	2.79E-03	0.028551762	-0.8504044
ZFP64	3.19846723	2.79E-03	0.028551762	-0.43239435
IQSEC3	-3.198282998	2.79E-03	0.028551762	0.50969305
E130016E03RIK	3.197734388	2.80E-03	0.02857829	-0.59758255
SLMAP	3.196984258	2.80E-03	0.028620544	-0.55281295
PRKRIR	3.193942045	2.83E-03	0.028835851	-0.79841985
ANKS6	3.193815725	2.83E-03	0.028835851	-0.3311148
ALDH1A1	3.192550761	2.84E-03	0.028918955	-1.4291249
AOF2	3.191543601	2.84E-03	0.028981961	-0.8388531
SDCCAG10	3.191322335	2.85E-03	0.028983089	-0.41469065
RHBDD3	3.190937759	2.85E-03	0.028997101	-1.0022652
SLC35E1	3.189383763	2.86E-03	0.029054535	-0.72790885
ANKRD7	3.189561502	2.86E-03	0.029054535	-0.5118873
ISX	-3.189628245	2.86E-03	0.029054535	0.3567041
CACYBP	-3.18982504	2.86E-03	0.029054535	0.4123601
TXNDC12	3.188883523	2.86E-03	0.029077763	-0.76098755
ATPAF1	-3.188462954	2.87E-03	0.029094713	0.6753154
1110054O05RIK	-3.187986892	2.87E-03	0.02909977	0.3842448
RPL22L1	-3.187994044	2.87E-03	0.02909977	0.4432206
FGF22	-3.187656727	2.87E-03	0.029109602	0.59228595
SUMO1	3.185982523	2.89E-03	0.029226018	-0.9662744
RBM13	3.185693368	2.89E-03	0.029232645	-0.4192993
DOK7	-3.185214623	2.89E-03	0.02925435	0.55460365
GUCY1A2	3.18451961	2.90E-03	0.029293287	-0.4278186
4432416J03RIK	3.184270768	2.90E-03	0.029296743	-0.8371033
2410091C18RIK	-3.18359413	2.91E-03	0.029311505	0.4046408
PIK3C2A	-3.183745306	2.91E-03	0.029311505	0.48016815
CLCN4-2	-3.183469721	2.91E-03	0.029311505	0.8296277
EG622339	3.182184041	2.92E-03	0.029330074	-0.7100356
CENPJ	3.182507066	2.91E-03	0.029330074	-0.46942645
AIRE	-3.182727894	2.91E-03	0.029330074	0.4105404
ZFP652	-3.18211707	2.92E-03	0.029330074	0.5065817
ZFP59	-3.182385654	2.92E-03	0.029330074	0.5293025
SLC6A12	-3.182008189	2.92E-03	0.029330074	0.68302445
CAR9	-3.181618683	2.92E-03	0.029344828	0.4343731
UGDH	-3.181207745	2.93E-03	0.029345925	0.32203075
PPP1R8	-3.181196511	2.93E-03	0.029345925	0.7198863
OLFR345	3.180542837	2.93E-03	0.029380209	-0.37635595
APOOL	-3.180358607	2.93E-03	0.029380209	0.3444081
1600021P15RIK	3.17993456	2.94E-03	0.02938843	-0.49740505
OLFR1351	-3.179848006	2.94E-03	0.02938843	0.41317895
AI661453	3.177976813	2.95E-03	0.02950548	-0.5290578
GPR87	-3.178048287	2.95E-03	0.02950548	0.53134075
NAGA	-3.177424624	2.96E-03	0.029533425	0.4035658
OTTMUSG00000000990	3.176179858	2.97E-03	0.029617025	-0.72191765
OLFR1015	-3.175024331	2.97E-03	0.029693661	0.34177445
ACP5	3.172730332	2.99E-03	0.029862583	-0.6668602
PAQR7	3.17114403	3.01E-03	0.029954254	-1.136444
SIRT6	-3.171279717	3.00E-03	0.029954254	0.35059685
N6AMT2	-3.170991131	3.01E-03	0.029954254	0.58121815
GNG3	-3.170380335	3.01E-03	0.02998741	0.63448785
PCDHB2	-3.169889195	3.02E-03	0.030010869	0.27792895
IL2RB	3.168884433	3.02E-03	0.030076208	-0.33323705
RPE	3.167797976	3.03E-03	0.030148363	-0.547596
V1RG5	-3.166704255	3.04E-03	0.030180018	0.3746166
CML3	-3.166971041	3.04E-03	0.030180018	0.5652868
KREMEN2	-3.166892116	3.04E-03	0.030180018	0.81004775
SGSH	-3.166601378	3.04E-03	0.030180018	0.94496445
PNKP	-3.166078878	3.05E-03	0.030206236	0.3611425
TAS2R109	-3.165197491	3.05E-03	0.030261901	0.6340823
1700021K19RIK	3.164637509	3.06E-03	0.030262832	-0.54209655
C8A	3.164580671	3.06E-03	0.030262832	-0.37834405
OLFR354	-3.164592125	3.06E-03	0.030262832	0.46828555
4833436C18RIK	3.16394074	3.07E-03	0.030298795	-0.60954655
MAP3K7	-3.162896179	3.07E-03	0.030368075	0.4857874
ZNRD1	-3.162355976	3.08E-03	0.030395956	0.29299205
0610038F07RIK	3.16191064	3.08E-03	0.030399476	-0.6819325
9030425E11RIK	3.162047867	3.08E-03	0.030399476	-0.6023232
EBPL	3.161049785	3.09E-03	0.030453842	-1.5488007
ZFP428	3.160576422	3.09E-03	0.030476309	-0.43910915
LOC100044089	3.159483798	3.10E-03	0.030533372	-0.33902145
2410018C20RIK	-3.15950745	3.10E-03	0.030533372	0.78463
SAMD3	-3.15909837	3.11E-03	0.030548642	0.53501355
2010106E10RIK	-3.158186158	3.11E-03	0.030590931	0.32017505
BCKDHA	-3.158289504	3.11E-03	0.030590931	0.46397795
0610011L14RIK	-3.157857739	3.12E-03	0.030601528	0.6696916
PPP1R12C	-3.157572055	3.12E-03	0.030608595	0.48455175
PCOLCE	-3.156681461	3.13E-03	0.030665842	0.6760228
ATP6AP1	3.156185767	3.13E-03	0.030690377	-1.6436458
AFF4	3.155468253	3.14E-03	0.030700139	-0.67178575
ZBTB33	3.15562642	3.14E-03	0.030700139	-0.53084405
EZH2	-3.155485766	3.14E-03	0.030700139	0.41820755
OLFR744	-3.1547995	3.14E-03	0.030739122	0.3984402
OLFR832	-3.154234356	3.15E-03	0.030769532	0.23434155
BNIP1	3.152982003	3.16E-03	0.030819576	-0.87529445
NADSYN1	3.152268552	3.16E-03	0.030819576	-0.49675545
TM2D1	-3.151840665	3.17E-03	0.030819576	0.2857114
PCP4	-3.152056296	3.17E-03	0.030819576	0.32064535
MRPL23	-3.151974624	3.17E-03	0.030819576	0.45017765
OLFR1378	-3.151952629	3.17E-03	0.030819576	0.459506
STAM2	-3.152731694	3.16E-03	0.030819576	0.51325
PTPN20	-3.152690701	3.16E-03	0.030819576	0.600626
V1RA1	-3.152454081	3.16E-03	0.030819576	0.61714235
NOX4	3.150468226	3.18E-03	0.030884372	-0.7586629
D030056L22RIK	3.150499981	3.18E-03	0.030884372	-0.563274
AMBRA1	-3.150728375	3.18E-03	0.030884372	0.3219354
ZBTB24	3.149717175	3.19E-03	0.030930557	-0.4956874
BARHL1	3.148885999	3.19E-03	0.030983525	-0.39735705
CYP2E1	3.146251295	3.22E-03	0.031144397	-0.86925125
QK	3.146704865	3.21E-03	0.031144397	-0.27917095
LOC619597	-3.146503861	3.21E-03	0.031144397	0.2043361
PTDSS2	-3.146177587	3.22E-03	0.031144397	0.45179945
LOC100043536	-3.145367996	3.22E-03	0.031195921	0.32584815
GM962	3.143743069	3.24E-03	0.03126631	-0.5049395
1700019G17RIK	-3.144073218	3.23E-03	0.03126631	0.35872985
LOC100044160	-3.143830674	3.24E-03	0.03126631	0.5934556
LTB4R2	-3.144199563	3.23E-03	0.03126631	0.64936675
PIBF1	3.142842126	3.25E-03	0.031300902	-0.27949655
CDKL4	-3.142846533	3.25E-03	0.031300902	0.5096861
EPHB3	-3.142741647	3.25E-03	0.031300902	0.51427325
WSCD1	-3.141972833	3.25E-03	0.03134927	0.428187
ICAM5	-3.141341989	3.26E-03	0.031386017	0.5466277
OLFR699	-3.14070423	3.26E-03	0.031406692	0.52539795
ZC3H13	-3.140824307	3.26E-03	0.031406692	0.95027195
ITGB2L	-3.139109341	3.28E-03	0.031525477	0.37073845
RAET1A	-3.137976908	3.29E-03	0.031605211	0.2181102
LOC100048483	3.137547302	3.29E-03	0.031625089	-1.23192055
REFBP2	3.136163557	3.30E-03	0.031709759	-0.42290765
D530004J12RIK	3.13619854	3.30E-03	0.031709759	-0.3270501
ZSWIM2	3.135553629	3.31E-03	0.03172835	-0.34853145
CTNNBL1	-3.135644253	3.31E-03	0.03172835	0.30405575
9530008L14RIK	3.13470047	3.32E-03	0.031767824	-0.59311005
OLFR329	-3.134762472	3.32E-03	0.031767824	0.56295
ZMYND12	-3.134353995	3.32E-03	0.031775015	0.69127165
9630050M13RIK	-3.134224588	3.32E-03	0.031775015	0.70949915
KRT25	3.132384628	3.34E-03	0.031916255	-0.4435087
BMP10	-3.131794433	3.34E-03	0.031950224	0.38694895
1190002N15RIK	3.131333024	3.35E-03	0.031956263	-0.4726613
ZP3	-3.131341169	3.35E-03	0.031956263	0.2253039
TMEM42	3.1302793	3.36E-03	0.031987842	-0.78303345
UCHL3	3.130562502	3.35E-03	0.031987842	-0.65214515
ABR	3.130337764	3.36E-03	0.031987842	-0.47567115
9930039A11RIK	3.130185241	3.36E-03	0.031987842	-0.3689809
OLFR332	3.128863591	3.37E-03	0.032085144	-0.3917341
FBXO46	3.128246022	3.38E-03	0.032087967	-0.6250239
LOC100045419	3.128297547	3.38E-03	0.032087967	-0.3665273
KCNC3	-3.12833485	3.38E-03	0.032087967	0.42173505
CDKL2	-3.127866547	3.38E-03	0.032103945	0.31450175
HARS2	-3.127604676	3.38E-03	0.032109759	0.24121135
ZFP710	3.127048139	3.39E-03	0.032141098	-0.8596311
ESD	3.125673755	3.40E-03	0.032226568	-0.3999818
OLFR492	-3.12567437	3.40E-03	0.032226568	0.79452035
BNIP2	3.12525959	3.40E-03	0.032243117	-0.49919655
CD70	-3.12509463	3.40E-03	0.032243117	0.4258799
MRGPRF	3.123898782	3.42E-03	0.032246686	-0.7755381
IQCC	3.124458224	3.41E-03	0.032246686	-0.6301685
SLC39A8	-3.124820917	3.41E-03	0.032246686	0.29440715
SDK2	-3.124066054	3.41E-03	0.032246686	0.30713495
FOXN2	-3.123777611	3.42E-03	0.032246686	0.53521205
ESRRBL1	-3.123696431	3.42E-03	0.032246686	0.794963
RGS6	-3.123927849	3.42E-03	0.032246686	0.9135743
BC015286	-3.122395363	3.43E-03	0.032326189	0.470116
LECT1	-3.122581244	3.43E-03	0.032326189	0.59095755
SH2B3	3.122049017	3.43E-03	0.032339514	-0.3610761
CSTA	-3.121574873	3.44E-03	0.032363989	0.5541801
4932441K18RIK	3.12074458	3.44E-03	0.032419566	-0.76496315
LRRC7	-3.120238865	3.45E-03	0.032446869	0.23098065
HADHB	3.119953428	3.45E-03	0.032454947	-0.95958595
NFS1	3.119668254	3.45E-03	0.032463012	-0.50837745
CSF2RA	3.118863408	3.46E-03	0.03249968	-0.7420523
FGFR3	3.11893502	3.46E-03	0.03249968	-0.57035115
SPTLC2	-3.118007132	3.47E-03	0.032540921	0.50705745
OLFR970	-3.118016545	3.47E-03	0.032540921	0.5630424
LRFN3	3.117590259	3.47E-03	0.032560584	-0.83413055
OLFR218	-3.117310385	3.48E-03	0.032568254	0.5646535
MEMO1	-3.116976605	3.48E-03	0.032580661	0.56697195
ADCK4	3.116259809	3.49E-03	0.032609829	-0.8735696
OLFR392	3.116353685	3.49E-03	0.032609829	-0.2897386
CETN3	3.115761643	3.49E-03	0.032636706	-0.85075855
ROPN1L	-3.115546408	3.49E-03	0.032638754	0.4141407
LY9	3.114350541	3.50E-03	0.032727042	-0.42814135
CEP97	3.113322839	3.51E-03	0.032783812	-0.41331585
GABRA6	-3.11335486	3.51E-03	0.032783812	0.3503293
UGT2B35	3.11305901	3.52E-03	0.032790183	-0.8478699
4632434I11RIK	3.112614786	3.52E-03	0.032812479	-0.54146895
CNOT7	3.112039329	3.53E-03	0.032846388	-0.5729241
TAS2R118	-3.111057066	3.54E-03	0.032916325	0.67899825
TAAR7D	-3.11080408	3.54E-03	0.032921789	0.60913025
6330416L07RIK	-3.110046662	3.55E-03	0.03297195	0.30028535
OLFR996	-3.109845522	3.55E-03	0.032972841	0.39076875
ZFP369	-3.109240932	3.55E-03	0.033009524	0.47288945
SLC23A1	-3.108156818	3.56E-03	0.033088873	0.3902138
IFI30	3.10735334	3.57E-03	0.03310998	-0.75728675
RDX	3.107538095	3.57E-03	0.03310998	-0.4442506
RIPK2	-3.107347282	3.57E-03	0.03310998	0.414782
TMEM126A	3.106944601	3.58E-03	0.033112534	-0.85147015
OLFR1118	-3.106937522	3.58E-03	0.033112534	0.20771645
CCDC18	-3.104502567	3.60E-03	0.033312832	0.2046175
LOC100047615	3.102393122	3.62E-03	0.033456549	-1.449808
RCC2	3.102528205	3.62E-03	0.033456549	-0.2994152
FGF18	-3.102328977	3.62E-03	0.033456549	0.4505876
ATP13A2	3.100771054	3.63E-03	0.0335547	-0.8240341
V1RC20	-3.100936282	3.63E-03	0.0335547	0.31549515
THSD7B	-3.100667881	3.64E-03	0.0335547	0.5158682
HTF9C	-3.099947487	3.64E-03	0.033602525	0.37122525
TGFB1	3.099449799	3.65E-03	0.033608853	-0.5569832
OLFR995	-3.099308188	3.65E-03	0.033608853	0.34608505
E030049G20RIK	-3.099600382	3.65E-03	0.033608853	0.47590225
GM1157	3.09832631	3.66E-03	0.033656626	-0.34264775
TCF25	-3.098243701	3.66E-03	0.033656626	0.27595085
OLFR1054	-3.098021355	3.66E-03	0.033656626	0.3304217
UBOX5	-3.098171141	3.66E-03	0.033656626	0.43356515
S100A10	3.097617519	3.67E-03	0.03367602	-0.99214235
CNTD1	-3.097421158	3.67E-03	0.033676676	0.36162215
DDX56	-3.096277831	3.68E-03	0.033763024	0.1959495
RPAP1	3.095683891	3.68E-03	0.033767052	-0.3705091
DOCK3	3.095666789	3.68E-03	0.033767052	-0.24499075
CLDN6	-3.095748118	3.68E-03	0.033767052	0.6199564
EPM2A	3.095465772	3.69E-03	0.03376817	-0.1941276
CAB39L	3.095234314	3.69E-03	0.033772054	-0.3834885
OPN4	-3.094920414	3.69E-03	0.033783417	0.43811675
ZCCHC11	3.094628459	3.70E-03	0.033792802	-0.2734144
SBNO2	-3.094319707	3.70E-03	0.03380372	0.55177645
GALNS	3.094108513	3.70E-03	0.033805801	-0.4750746
SMC5L1	3.093111617	3.71E-03	0.033876239	-0.87269015
PDK1	3.092858427	3.71E-03	0.033876239	-0.60416385
TMEM151A	-3.092768241	3.71E-03	0.033876239	0.45612015
ZFP93	-3.091756614	3.72E-03	0.033951149	0.39490625
FZR1	-3.091236917	3.73E-03	0.03396427	0.2802935
SNRPE	-3.091306768	3.73E-03	0.03396427	0.5933219
NOTCH1	3.090593107	3.74E-03	0.033988735	-0.6394275
2610028A01RIK	-3.090701009	3.73E-03	0.033988735	0.49964275
SLC38A10	3.089906703	3.74E-03	0.033992134	-0.7186378
PET112L	3.089377307	3.75E-03	0.033992134	-0.47746875
GPR18	3.089445181	3.75E-03	0.033992134	-0.44096035
INTS9	-3.089245228	3.75E-03	0.033992134	0.38971965
PGLS	-3.089948373	3.74E-03	0.033992134	0.5114109
EAPA2	-3.089323152	3.75E-03	0.033992134	0.54505565
JSRP1	-3.08952156	3.75E-03	0.033992134	0.912046
TCF23	-3.088539772	3.76E-03	0.034039413	0.5363551
4921511C20RIK	-3.088319193	3.76E-03	0.034042495	0.58828895
C330043M08RIK	-3.08795796	3.76E-03	0.034058421	0.50929395
[truncated: 16,099 more rows]
